# Supplementary material for: Synthesis and Antiproliferative Activity of 2,4,6,7-Tetrasubstituted-2H-pyrazolo[4,3-c]pyridines
Source: MDPI journal article supplement (doi:10.3390/molecules26216747), 2021-11-08
Supplement: s1 [file s1]

## Supplementary Materials

### Synthesis and Antiproliferative Activity of 2,4,6,7-Tetrasubstituted-2*H*-pyrazolo[4,3-*c*]pyridines

Beatričė Razmienė<sup>1,2</sup>, Eva Řezníčková<sup>3</sup>, Vaida Dambrauskienė<sup>1</sup>, Radek Ostruszka<sup>4</sup>, Martin Kubala<sup>4</sup>, Asta Žukauskaitė<sup>5,\*</sup>, Vladimír Kryštof<sup>3,6</sup>, Algirdas Šačkus<sup>1,2</sup>, Eglė Arbačiauskienė<sup>1,\*</sup>

<sup>1</sup> Department of Organic Chemistry, Kaunas University of Technology, Radvilėnų pl. 19, LT-50254 Kaunas, Lithuania

<sup>2</sup> Institute of Synthetic Chemistry, Kaunas University of Technology, K. Baršausko g. 59, LT-51423 Kaunas, Lithuania

<sup>3</sup> Department of Experimental Biology, Palacký University, Šlechtitelů 27, CZ-78371 Olomouc, Czech Republic

<sup>4</sup> Department of Experimental Physics, Faculty of Science, Palacký University, 17. listopadu 12, CZ-77146 Olomouc, Czech Republic

<sup>5</sup> Department of Chemical Biology, Palacký University, Šlechtitelů 27, CZ-78371 Olomouc, Czech Republic

<sup>6</sup> Institute of Molecular and Translational Medicine, Faculty of Medicine and Dentistry, Palacký University, Hněvotínská 5, CZ-77900 Olomouc, Czech Republic

\* Corresponding authors: asta.zukauskaite@upol.cz (A. Žukauskaitė), egle.arbaciauskiene@ktu.lt (E. Arbačiauskienė)

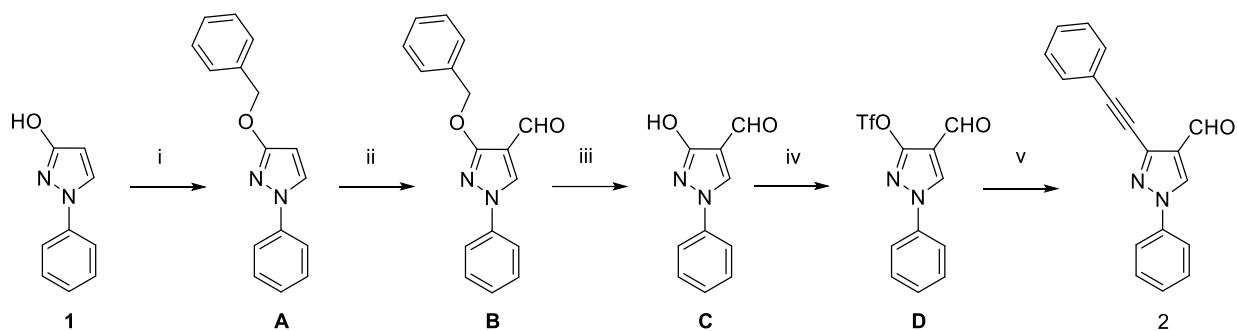

**Scheme S1.** Synthesis of 1-phenyl-3-(phenylethynyl)-1*H*-pyrazole-4-carbaldehyde (**2**) by previously published procedures.

*Reagents and conditions:* i: NaH, BnCl, DMF, argon atmosphere, 60 °C, 1 h; ii: POCl<sub>3</sub>, DMF, 0 °C for 10 min to 60 °C for 30 min; iii: TFA, toluene, rt, 24 h; iv: Tf<sub>2</sub>O, TEA, DCM, rt, 1 h.

**Table S1.** Fundamental absorption and fluorescence characteristics of compounds **18-42** in THF ( $\lambda_{\text{ex}} = 350$  nm)

| Compound  | $\lambda_{\text{abs}}$ (nm) | $\varepsilon \times 10^3$ (dm <sup>3</sup> mol <sup>-1</sup> cm <sup>-1</sup> ) | $\lambda_{\text{em}}$ (nm) | SS (nm) | $\Phi_f$ (%) |
|-----------|-----------------------------|---------------------------------------------------------------------------------|----------------------------|---------|--------------|
| <b>18</b> | 260                         | 30.38                                                                           | 442                        | 130     | 18.9         |
|           | 312                         | 13.23                                                                           |                            |         |              |
| <b>19</b> | 261                         | 34.67                                                                           | 447                        | 136     | 26.2         |
|           | 311                         | 16.86                                                                           |                            |         |              |
| <b>20</b> | 260                         | 35.55                                                                           | 437                        | 126     | 53.2         |
|           | 311                         | 16.29                                                                           |                            |         |              |
| <b>21</b> | 263                         | 31.95                                                                           | 461                        | 151     | 71.8         |
|           | 310                         | 15.80                                                                           |                            |         |              |
|           | 351 shoulder                | 8.07                                                                            |                            |         |              |
| <b>22</b> | 267                         | 32.04                                                                           | 478                        | 167     | 56.8         |
|           | 311                         | 16.09                                                                           |                            |         |              |
|           | 357 shoulder                | 7.74                                                                            |                            |         |              |
| <b>23</b> | 265                         | 28.94                                                                           | 467                        | 202     | 72.7         |
| <b>24</b> | 261                         | 36.46                                                                           | 449                        | 138     | 17.6         |
|           | 311                         | 17.34                                                                           |                            |         |              |
| <b>25</b> | 261                         | 29.68                                                                           | 449                        | 139     | 30.0         |
|           | 310                         | 15.11                                                                           |                            |         |              |
| <b>26</b> | 263                         | 38.05                                                                           | 450                        | 140     | 48.7         |
|           | 310                         | 17.48                                                                           |                            |         |              |
| <b>27</b> | 265                         | 31.58                                                                           | 466                        | 117     | 72.2         |
|           | 317                         | 14.93                                                                           |                            |         |              |
|           | 349 shoulder                | 9.31                                                                            |                            |         |              |
| <b>28</b> | 266                         | 30.31                                                                           | 481                        | 125     | 62.8         |
|           | 316                         | 13.14                                                                           |                            |         |              |
|           | 356 shoulder                | 7.28                                                                            |                            |         |              |
| <b>29</b> | 264                         | 24.96                                                                           | 465                        | 201     | 74.8         |
| <b>30</b> | 262                         | 32.79                                                                           | 449                        | 137     | 21.3         |
|           | 312                         | 14.13                                                                           |                            |         |              |
| <b>31</b> | 265                         | 35.93                                                                           | 464                        | 199     | 73.1         |
| <b>32</b> | 264                         | 39.45                                                                           | 465                        | 201     | 64.7         |
| <b>33</b> | 263                         | 35.01                                                                           | 449                        | 141     | 52.2         |
|           | 308                         | 14.49                                                                           |                            |         |              |
| <b>34</b> | 260                         | 21.84                                                                           | 453                        | 140     | 0.9          |
|           | 313                         | 10.61                                                                           |                            |         |              |
| <b>35</b> | 260                         | 45.49                                                                           | 445                        | 133     | 7.0          |
|           | 312                         | 21.11                                                                           |                            |         |              |
| <b>36</b> | 262                         | 37.32                                                                           | 455                        | 141     | 14.2         |
|           | 314                         | 16.56                                                                           |                            |         |              |
| <b>37</b> | 266                         | 36.30                                                                           | 470                        | 204     | 61.7         |
| <b>38</b> | 265                         | 41.18                                                                           | 467                        | 202     | 68.9         |
| <b>39</b> | 269                         | 29.03                                                                           | 487                        | 118     | 39.7         |
|           | 369                         | 9.84                                                                            |                            |         |              |
| <b>40</b> | 265                         | 48.93                                                                           | 469                        | 204     | 83.5         |
| <b>41</b> | 265                         | 36.45                                                                           | 467                        | 202     | 69.9         |
| <b>42</b> | 265                         | 42.38                                                                           | 470                        | 205     | 84.6         |

**Table S2.** Fundamental absorption\* and fluorescence characteristics of compounds **18-42** in Britton–Robinson buffer at pH 5, 7 and 9 ( $\lambda_{\text{ex}} = 360 \text{ nm}$ )

| Compound  | pH = 5                              |                                    |                       | pH = 7                              |                                    |                       | pH = 9                              |                                    |                       |
|-----------|-------------------------------------|------------------------------------|-----------------------|-------------------------------------|------------------------------------|-----------------------|-------------------------------------|------------------------------------|-----------------------|
|           | $\lambda_{\text{abs}} \text{ (nm)}$ | $\lambda_{\text{em}} \text{ (nm)}$ | $\Phi_f \text{ (\%)}$ | $\lambda_{\text{abs}} \text{ (nm)}$ | $\lambda_{\text{em}} \text{ (nm)}$ | $\Phi_f \text{ (\%)}$ | $\lambda_{\text{abs}} \text{ (nm)}$ | $\lambda_{\text{em}} \text{ (nm)}$ | $\Phi_f \text{ (\%)}$ |
| <b>18</b> | 259                                 | 447                                | 40.4                  | 254                                 | 439                                | 16.0                  | 253                                 | 436                                | 22.1                  |
| <b>19</b> | 258                                 | 455                                | 4.4                   | 253                                 | 459                                | 33.4                  | 253                                 | 458                                | 34.3                  |
| <b>20</b> | 261                                 | 444                                | 2.0                   | 255                                 | 440                                | 6.5                   | 255                                 | 439                                | 5.7                   |
| <b>21</b> | 259                                 | 497                                | 12.2                  | 256                                 | 458                                | 37.2                  | 256                                 | 458                                | 59.9                  |
| <b>22</b> | 257                                 | 507                                | 0.4                   | 256                                 | 511                                | 4.3                   | 256                                 | 495                                | 7.1                   |
| <b>23</b> | 259                                 | 445                                | 0.1                   | 255                                 | 461                                | 0.1                   | 255                                 | 469                                | 0.1                   |
| <b>24</b> | 261                                 | 443                                | 81.3                  | 254                                 | 442                                | 17.7                  | 254                                 | 435                                | 17.7                  |
| <b>25</b> | 259                                 | 486                                | 2.0                   | 253                                 | 456                                | 18.2                  | 252                                 | 455                                | 43.1                  |
| <b>26</b> | 262                                 | 446                                | 0.4                   | 257                                 | 446                                | 6.1                   | 256                                 | 440                                | 6.6                   |
| <b>27</b> | 264                                 | 509                                | 17.0                  | 257                                 | 459                                | 22.0                  | 258                                 | 458                                | 24.0                  |
| <b>28</b> | 257                                 | 499                                | 0.2                   | 256                                 | 504                                | 9.6                   | 255                                 | 495                                | 14.2                  |
| <b>29</b> | 262                                 | 446                                | 0.3                   | 255                                 | 466                                | 0.2                   | 254                                 | 454                                | 0.2                   |
| <b>30</b> | 261                                 | 444                                | 77.5                  | 260                                 | 438                                | 14.0                  | 262                                 | 436                                | 15.3                  |
| <b>31</b> | 262                                 | 511                                | 18.2                  | 269                                 | 457                                | 35.3                  | 267                                 | 457                                | 37.8                  |
| <b>32</b> | 257                                 | 497                                | 1.3                   | 255                                 | 491                                | 13.5                  | 255                                 | 485                                | 14.9                  |
| <b>33</b> | 263                                 | 459                                | 35.7                  | 265                                 | 449                                | 17.9                  | 266                                 | 448                                | 17.4                  |
| <b>34</b> | 264                                 | 438                                | 8.6                   | 266                                 | 439                                | 8.7                   | 264                                 | 440                                | 10.1                  |
| <b>35</b> | 267                                 | 438                                | 10.1                  | 269                                 | 440                                | 9.9                   | 267                                 | 438                                | 11.1                  |
| <b>36</b> | 265                                 | 443                                | 15.3                  | 266                                 | 441                                | 14.1                  | 265                                 | 443                                | 17.6                  |
| <b>37</b> | 264                                 | 443                                | 0.4                   | 254                                 | 495                                | 0.1                   | 255                                 | 475                                | 0.2                   |
| <b>38</b> | 269                                 | 457                                | 28.9                  | 270                                 | 458                                | 35.6                  | 272                                 | 458                                | 36.0                  |
| <b>39</b> | 285                                 | 479                                | 26.6                  | 280                                 | 481                                | 31.5                  | 277                                 | 480                                | 34.3                  |
| <b>40</b> | 266                                 | 493                                | 10.1                  | 269                                 | 481                                | 15.0                  | 268                                 | 482                                | 17.4                  |
| <b>41</b> | 271                                 | 474                                | 11.6                  | 272                                 | 472                                | 17.0                  | 270                                 | 470                                | 19.1                  |
| <b>42</b> | 269                                 | 458                                | 18.5                  | 271                                 | 459                                | 33.6                  | 270                                 | 458                                | 37.5                  |

\*In aqueous solution, the absorption bands above 300 nm become extremely broad, and they are manifested as an extended shoulder, for which it is impossible to identify precise maximum position. Nevertheless, for all species, it was possible to use 360 nm as an excitation wavelength in fluorescence experiments in the examined pH range.



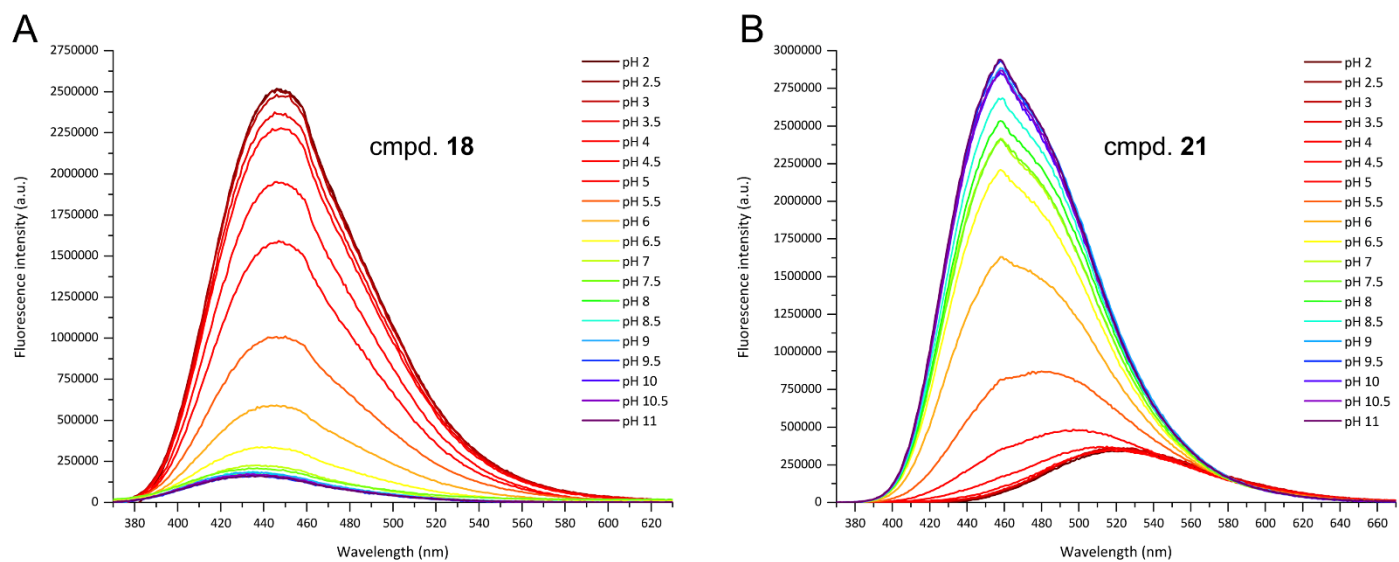

**Figure S1.** Fluorescence spectra ( $\lambda_{\text{ex}} = 360$  nm) and titration profiles for compounds **18** (part A) and **21** (part B) in Britton–Robinson buffer at pH 2–11.

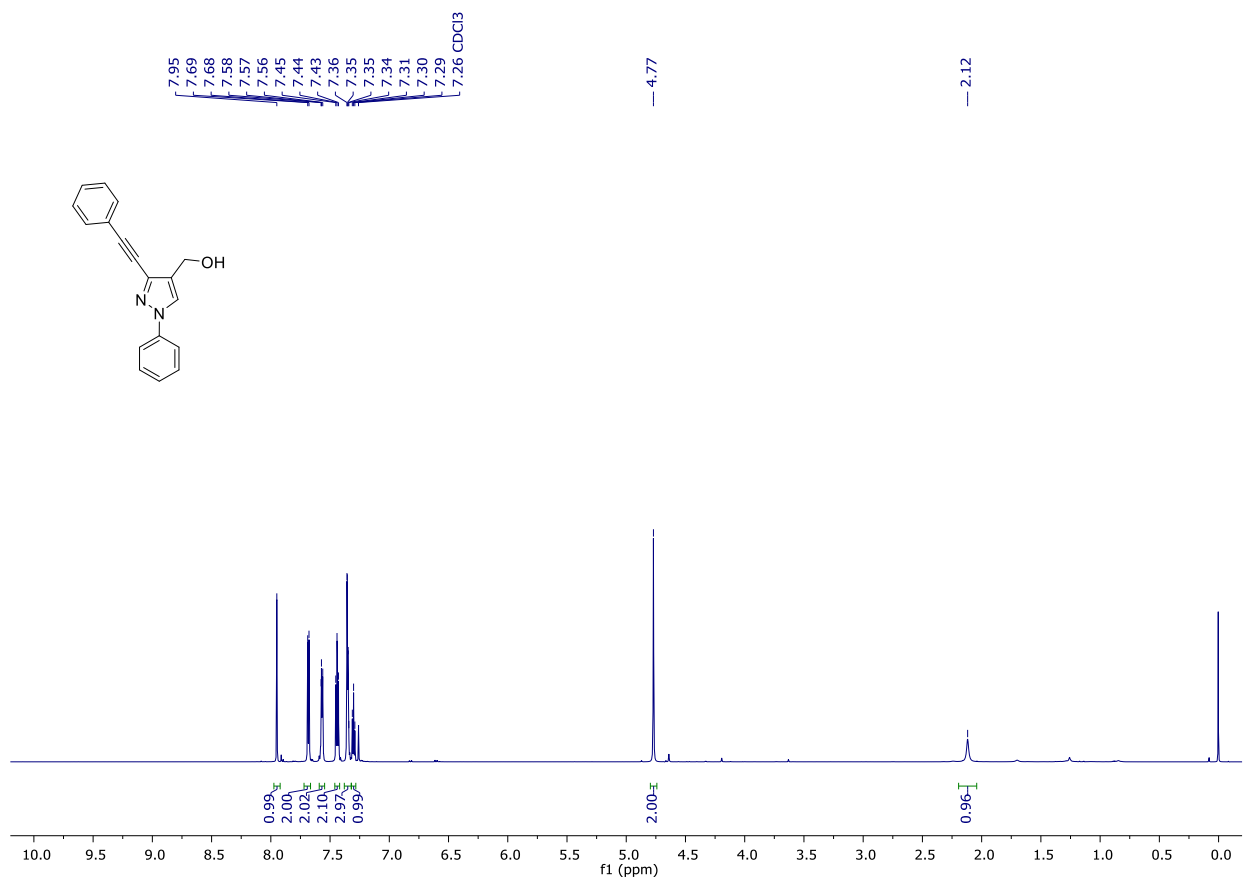

**Figure S2.** [1-Phenyl-3-(phenylethynyl)-1*H*-pyrazol-4-yl]methanol (**3**). <sup>1</sup>H NMR spectrum (700 MHz, CDCl<sub>3</sub>).

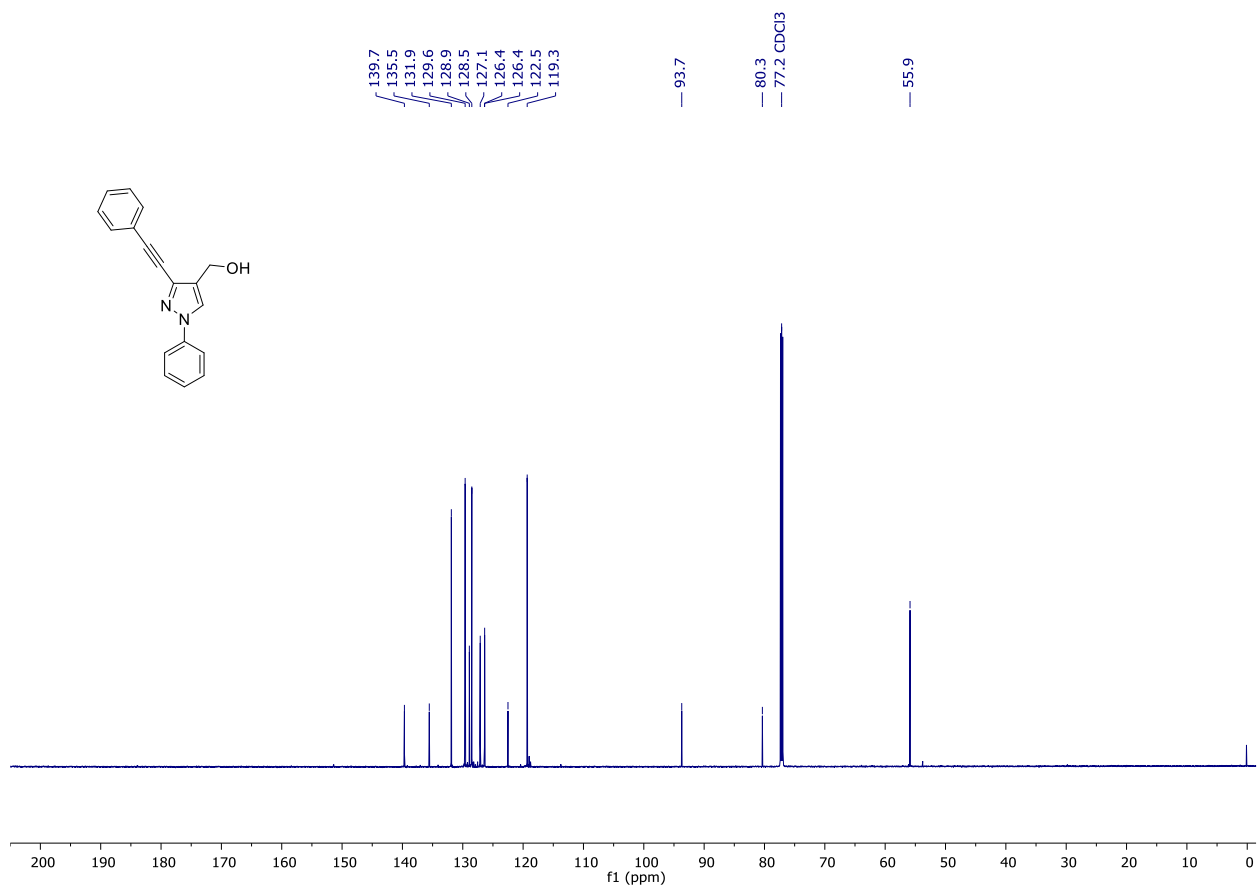

**Figure S3.** [1-Phenyl-3-(phenylethynyl)-1*H*-pyrazol-4-yl]methanol (**3**). <sup>13</sup>C NMR (176 MHz, CDCl<sub>3</sub>).

+MS, 8.6min #514

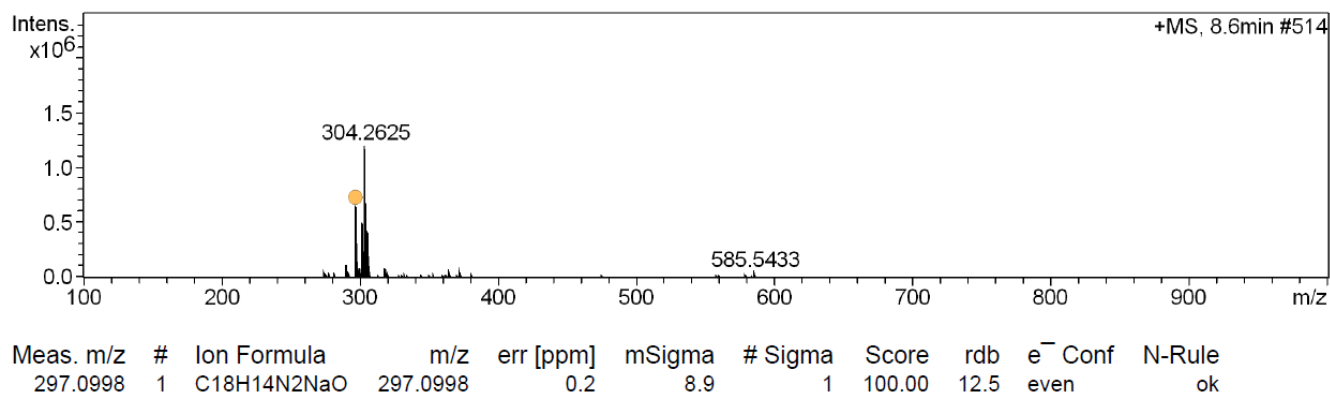

**Figure S4.** [1-Phenyl-3-(phenylethynyl)-1*H*-pyrazol-4-yl]methanol (**3**). HRMS (ESI-TOF).

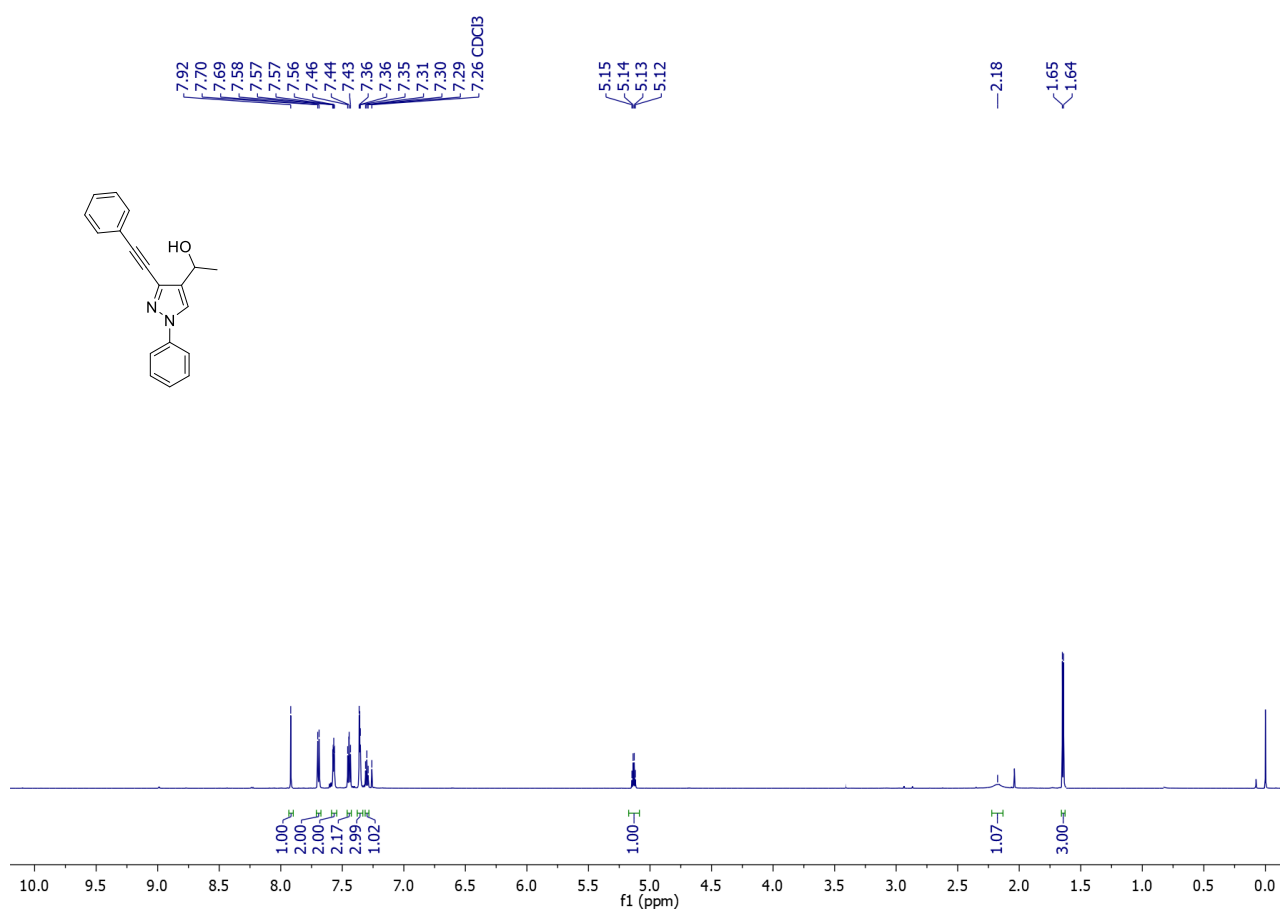

**Figure S5.** 1-[1-Phenyl-3-(phenylethynyl)-1*H*-pyrazol-4-yl]ethanol-1-ol (**4**). <sup>1</sup>H NMR spectrum (700 MHz, CDCl<sub>3</sub>).

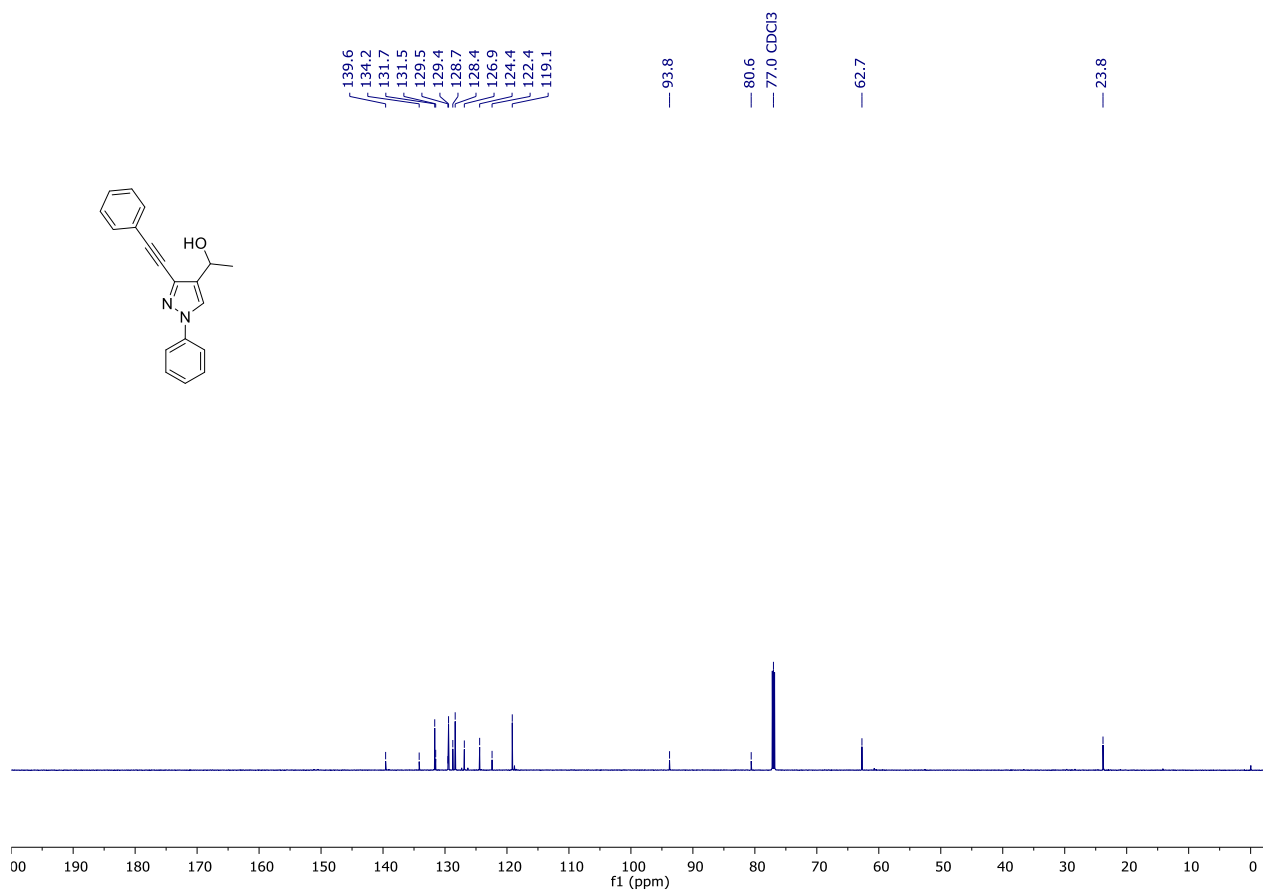

**Figure S6.** 1-[1-Phenyl-3-(phenylethynyl)-1H-pyrazol-4-yl]ethanol-1-ol (**4**). <sup>13</sup>C NMR (176 MHz, CDCl<sub>3</sub>).

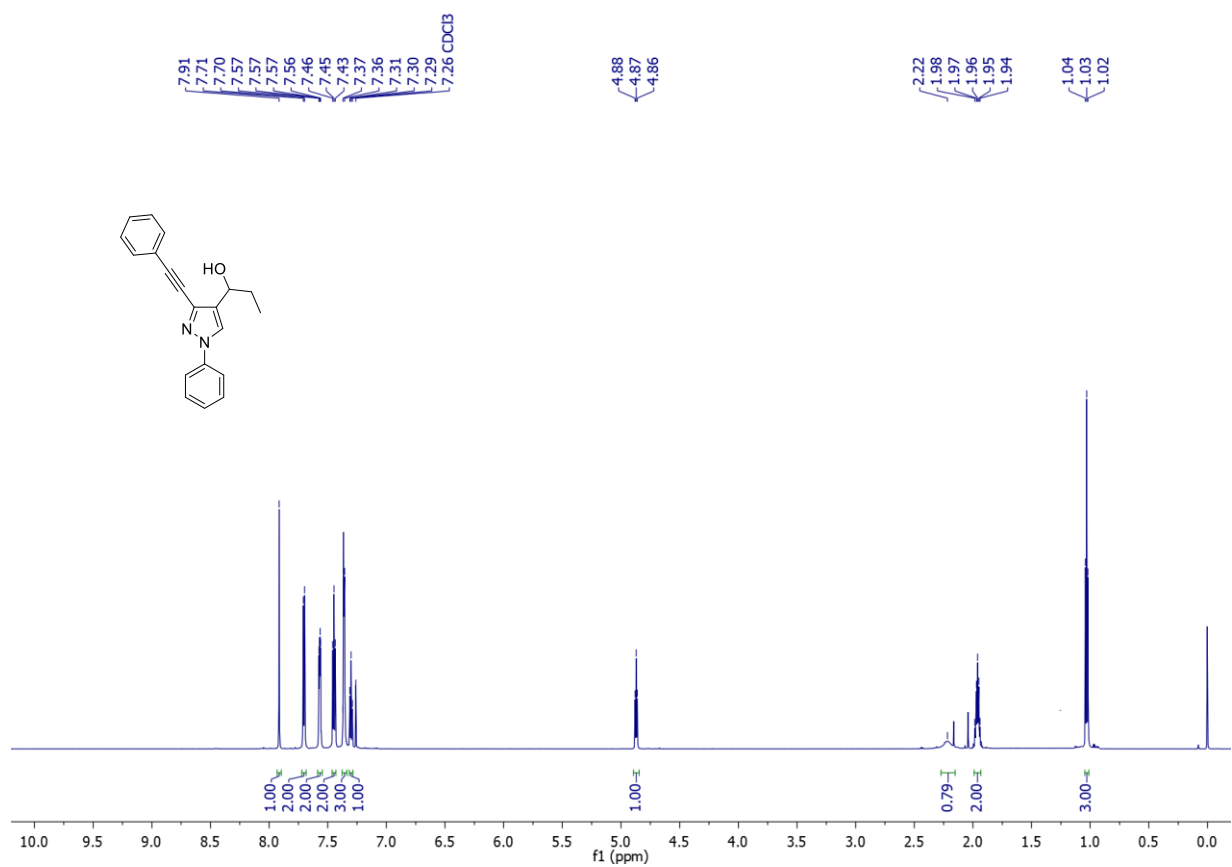

**Figure S7.** 1-(1-phenyl-3-(phenylethynyl)-1H-pyrazol-4-yl)propan-1-ol (**5**). <sup>1</sup>H NMR spectrum (700 MHz, CDCl<sub>3</sub>).

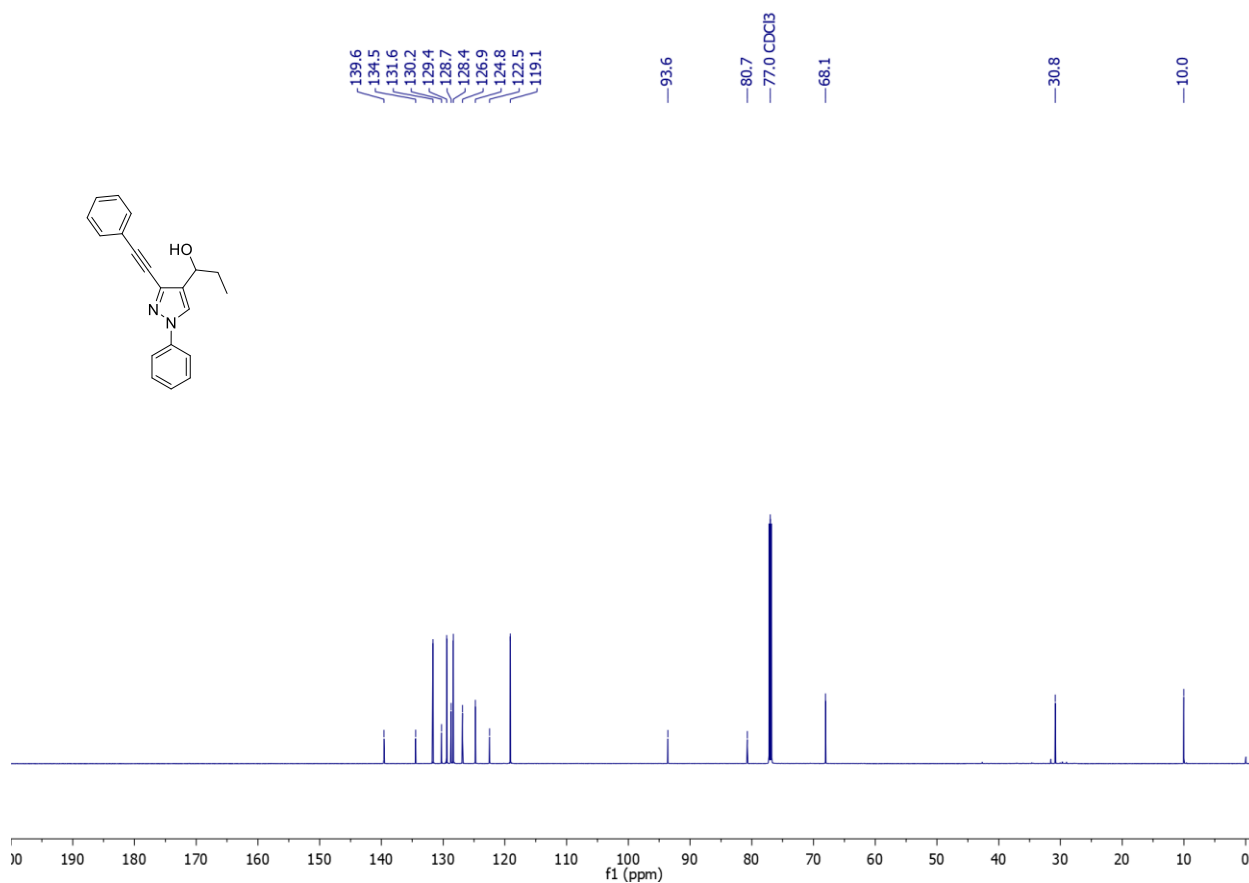

**Figure S8.** 1-(1-phenyl-3-(phenylethynyl)-1H-pyrazol-4-yl)propan-1-ol (**5**). <sup>13</sup>C NMR (176 MHz, CDCl<sub>3</sub>).

**+MS, 5.4min #326**

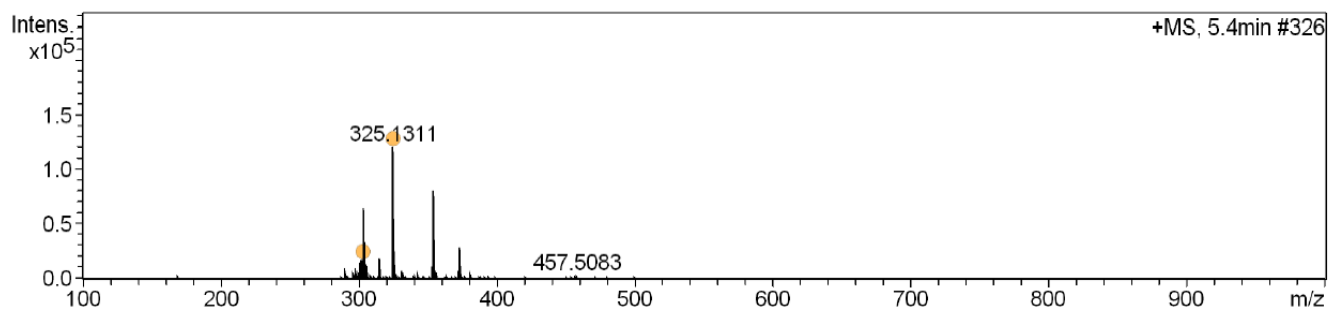

| Meas. m/z | # | Ion Formula                                        | m/z      | err [ppm] | mSigma | # Sigma | Score  | rdb  | e <sup>-</sup> Conf | N-Rule |
|-----------|---|----------------------------------------------------|----------|-----------|--------|---------|--------|------|---------------------|--------|
| 303.1491  | 1 | C <sub>20</sub> H <sub>19</sub> N <sub>2</sub> O   | 303.1492 | -0.2      | 12.3   | 1       | 100.00 | 12.5 | even                | ok     |
| 325.1311  | 1 | C <sub>20</sub> H <sub>18</sub> N <sub>2</sub> NaO | 325.1311 | -0.2      | 4.5    | 1       | 100.00 | 12.5 | even                | ok     |

**Figure S9.** 1-(1-phenyl-3-(phenylethynyl)-1H-pyrazol-4-yl)propan-1-ol (**5**). HRMS (ESI-TOF).

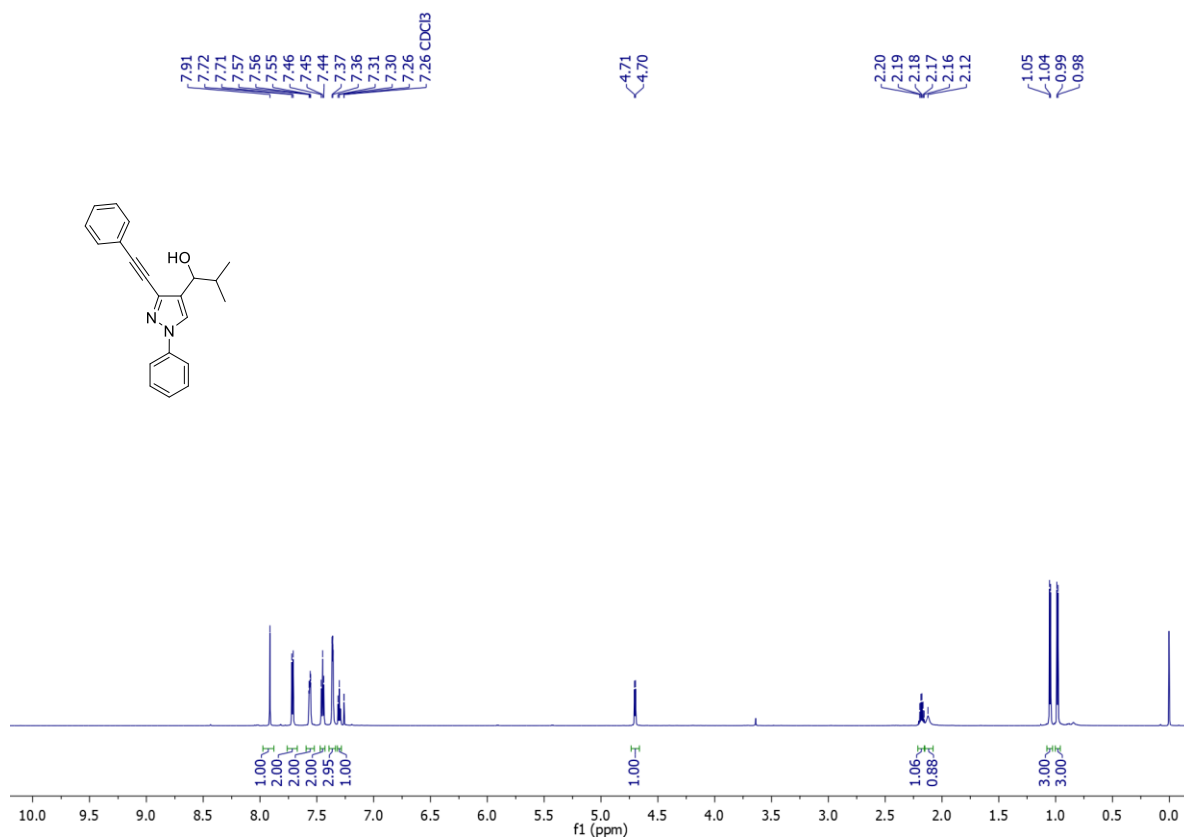

**Figure S10.** 2-Methyl-1-[1-phenyl-3-(phenylethynyl)-1H-pyrazol-4-yl]propan-1-ol (**6**). <sup>1</sup>H NMR spectrum (700 MHz, CDCl<sub>3</sub>).

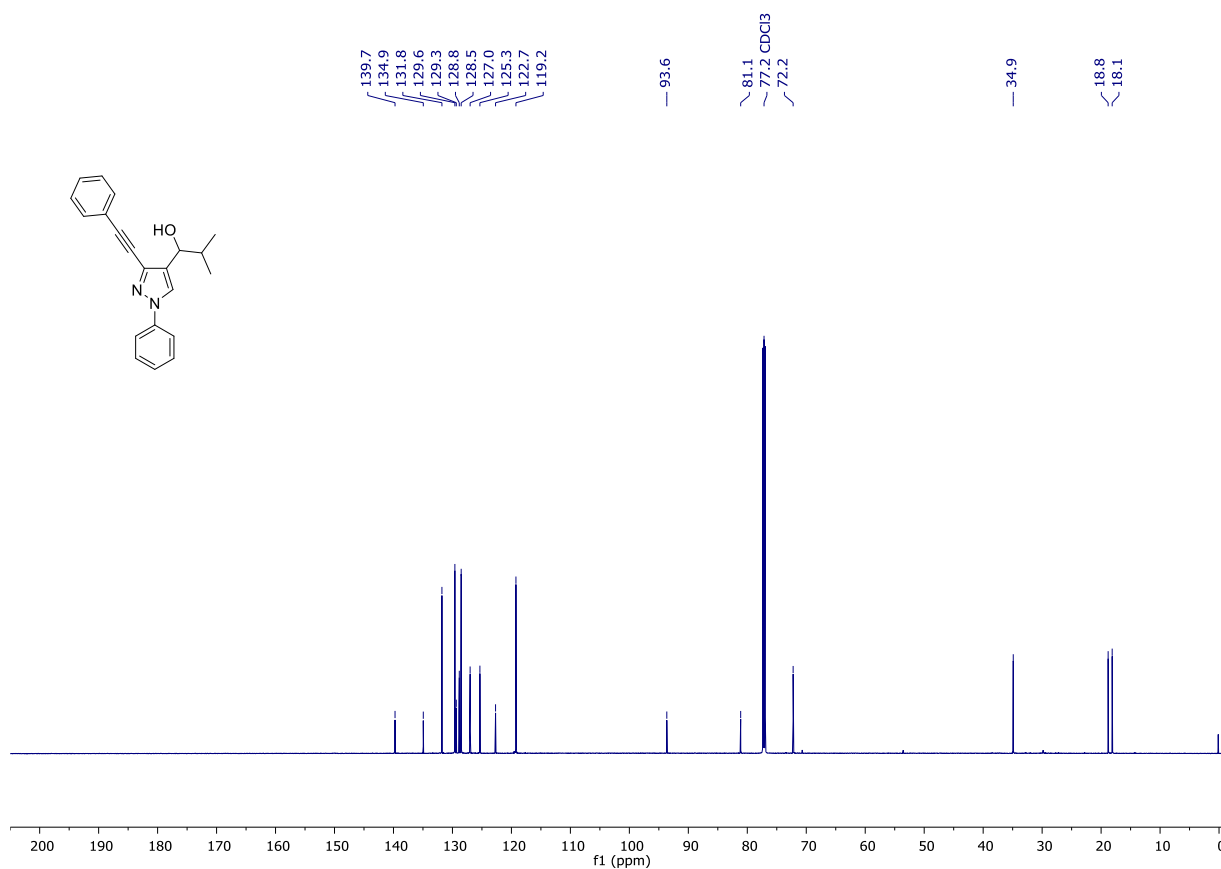

**Figure S11.** 2-Methyl-1-[1-phenyl-3-(phenylethynyl)-1H-pyrazol-4-yl]propan-1-ol (**6**). <sup>13</sup>C NMR (176 MHz, CDCl<sub>3</sub>).

+MS, 2.5min #150

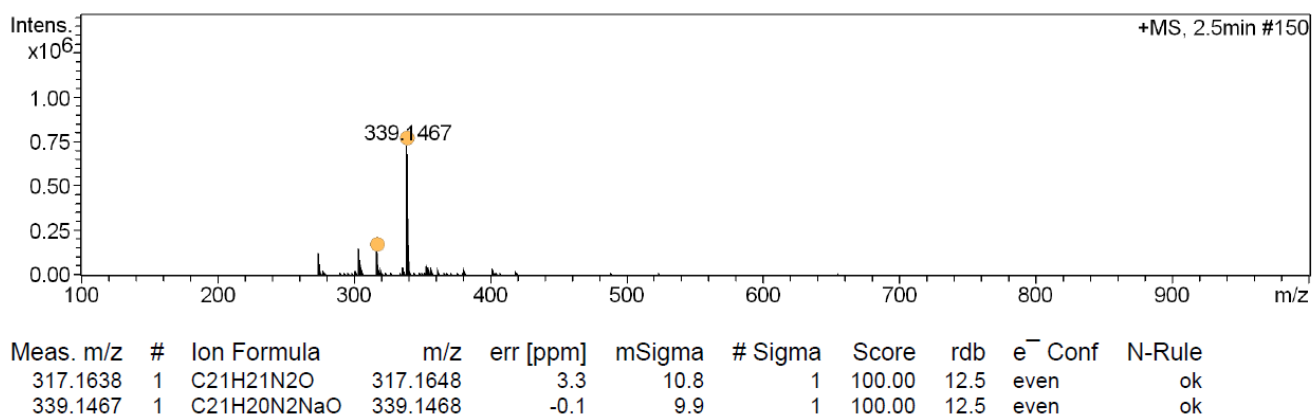

**Figure S12.** 2-Methyl-1-[1-phenyl-3-(phenylethynyl)-1*H*-pyrazol-4-yl]propan-1-ol (**6**). HRMS (ESI-TOF).

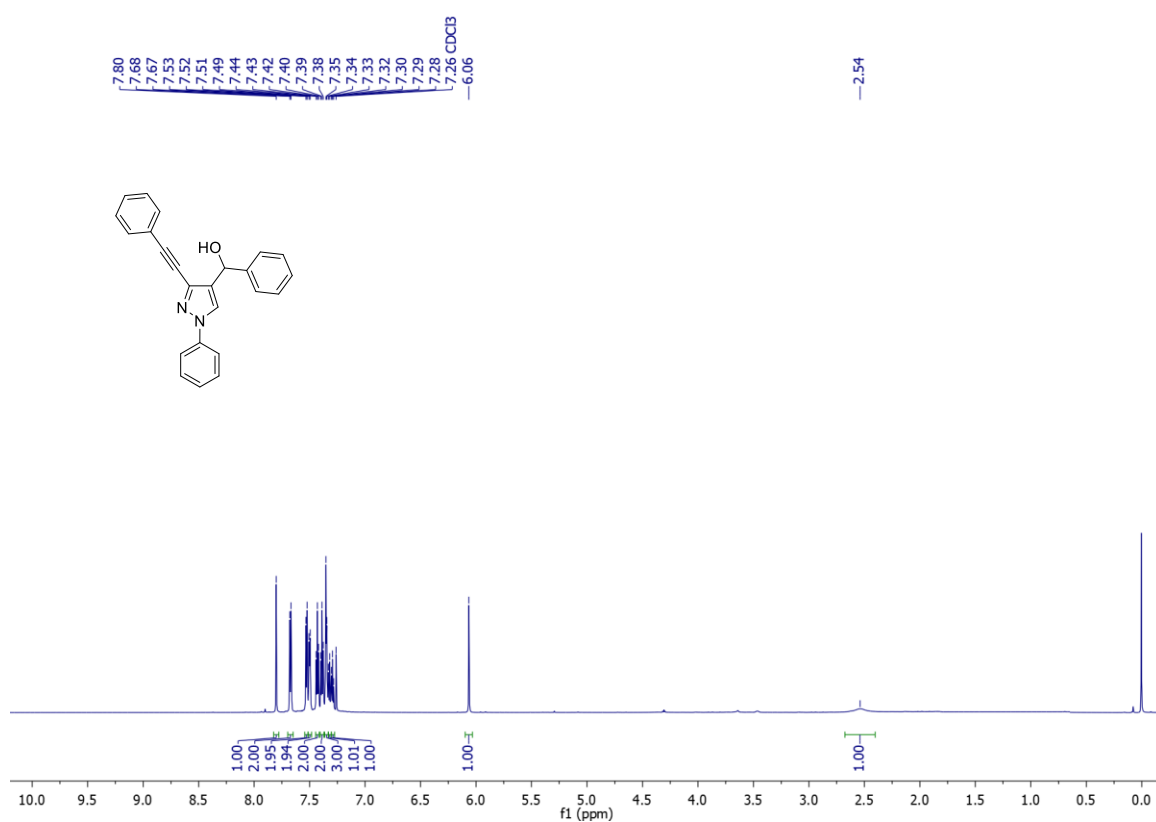

**Figure S13.** Phenyl(1-phenyl-3-(phenylethynyl)-1*H*-pyrazol-4-yl)methanol (**7**). <sup>1</sup>H NMR spectrum (700 MHz, CDCl<sub>3</sub>).





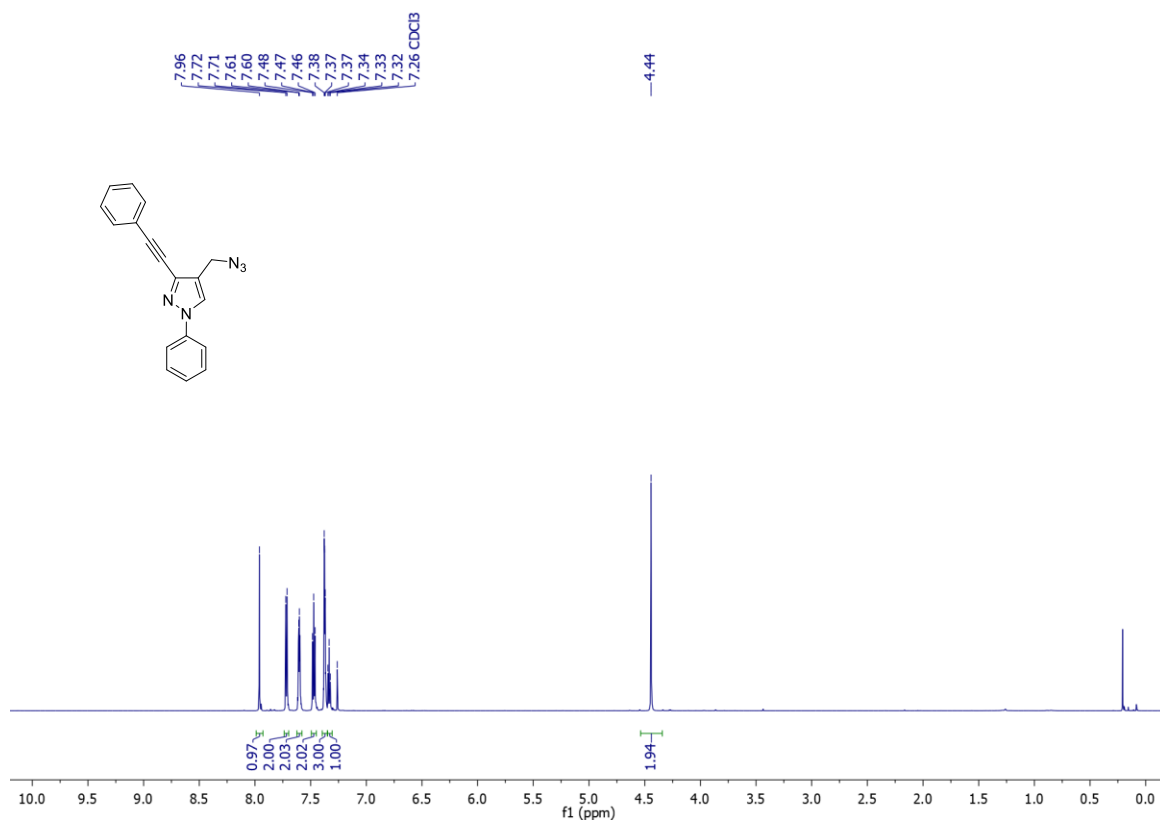

**Figure S16.** 4-(Azidomethyl)-1-phenyl-3-(phenylethynyl)-1*H*-pyrazole (**8**). <sup>1</sup>H NMR spectrum (700 MHz, CDCl<sub>3</sub>).

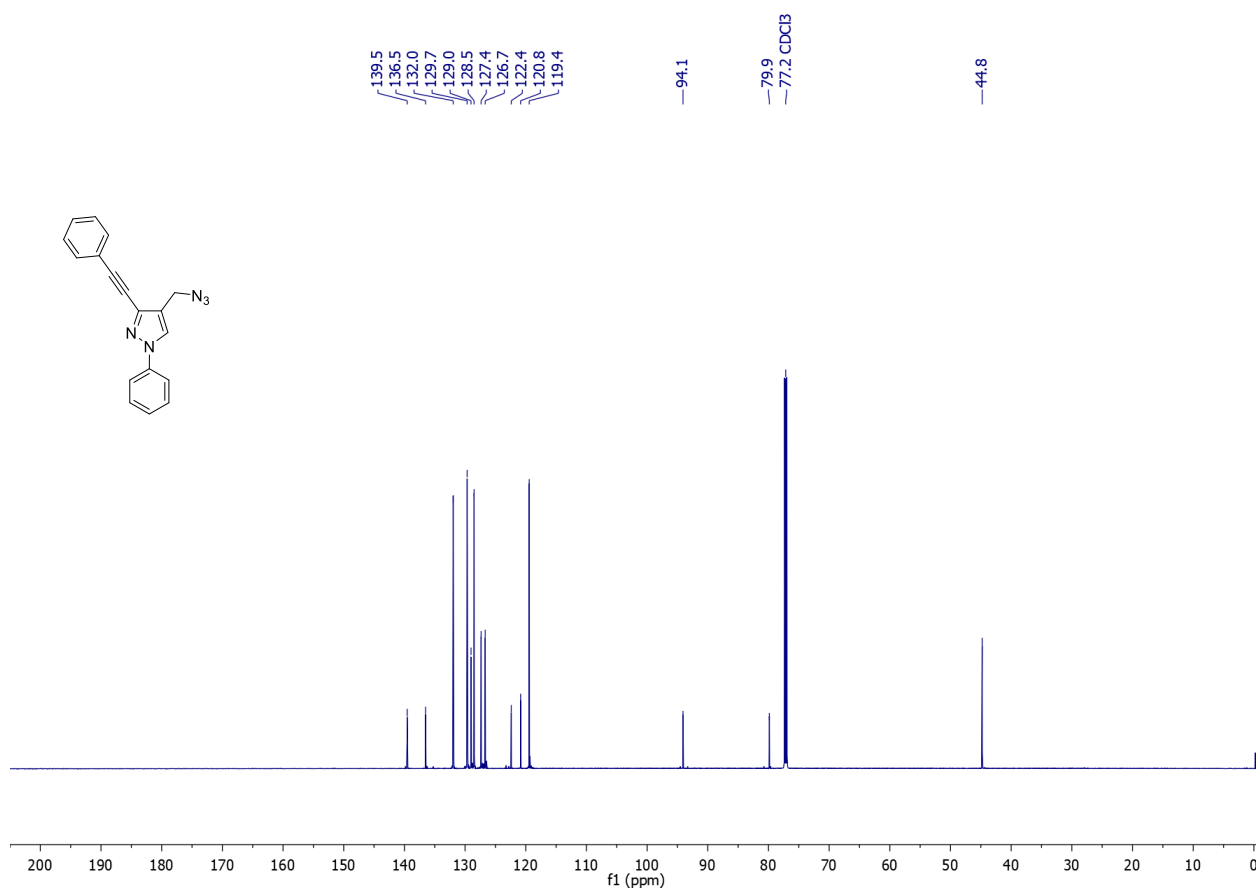

**Figure S17.** 4-(Azidomethyl)-1-phenyl-3-(phenylethynyl)-1*H*-pyrazole (**8**). <sup>13</sup>C NMR (176 MHz, CDCl<sub>3</sub>).

**+MS, 8.3min #500**

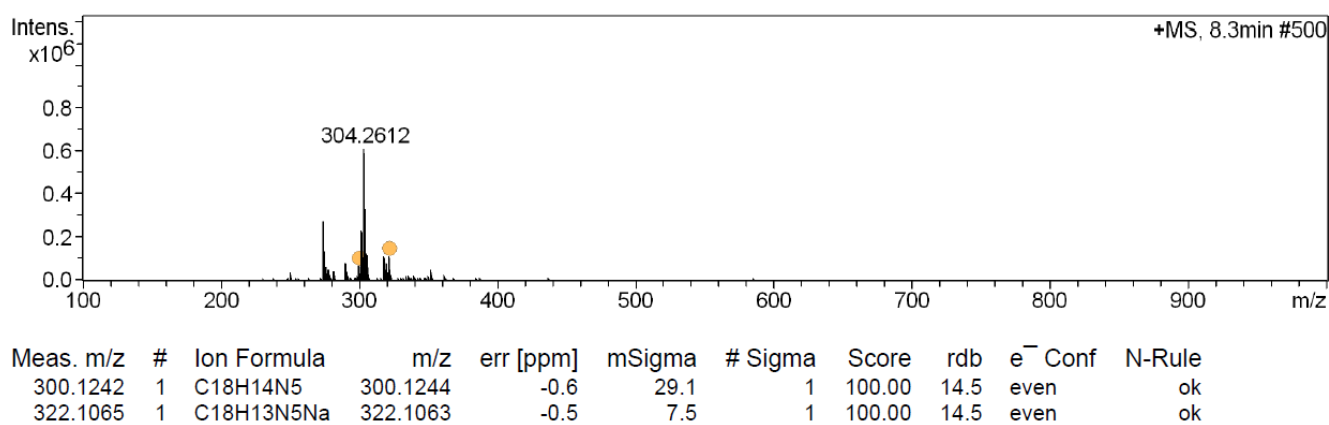

**Figure S18.** 4-(Azidomethyl)-1-phenyl-3-(phenylethynyl)-1*H*-pyrazole (**8**). HRMS (ESI-TOF).

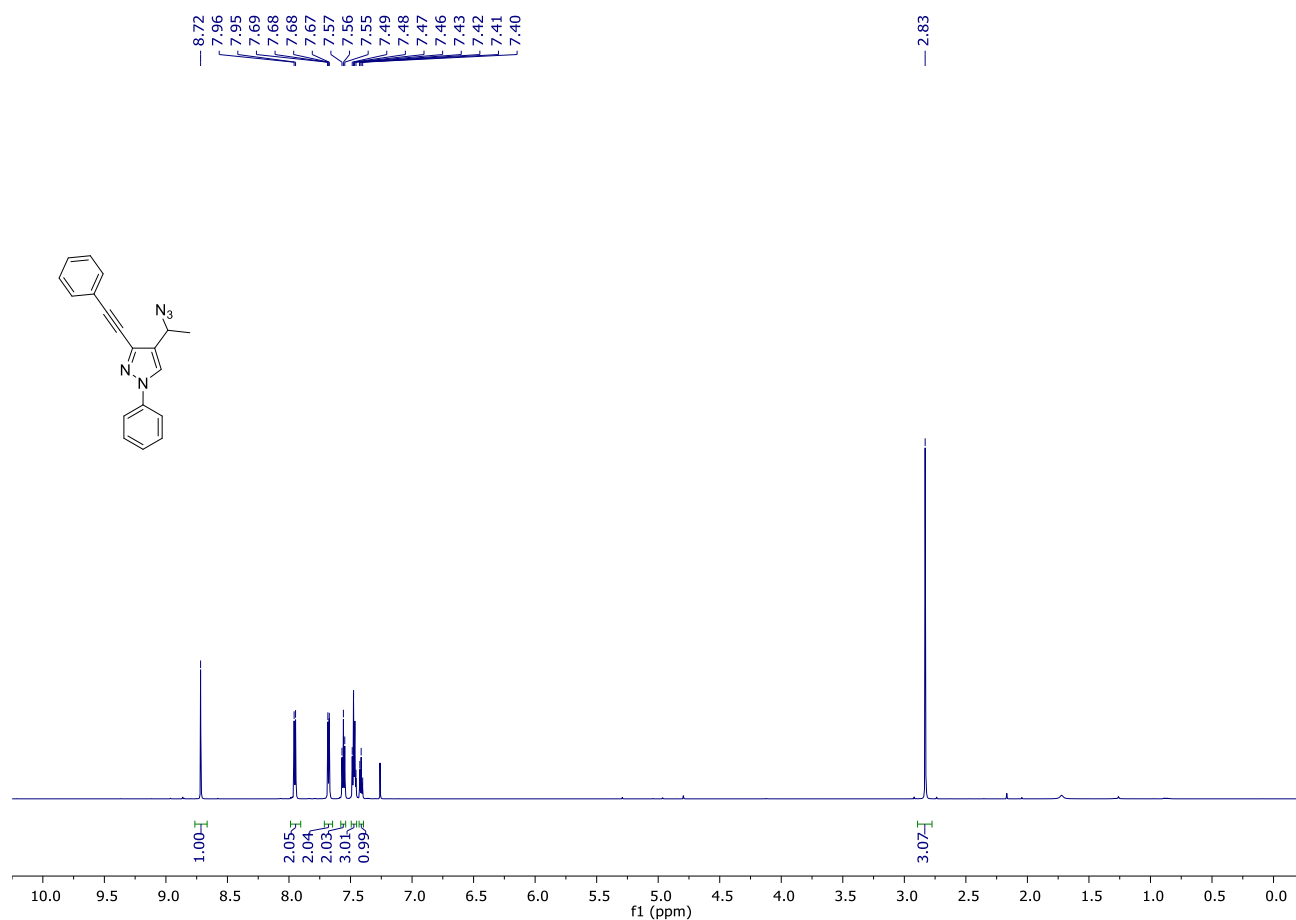

**Figure S19.** 4-(1-Azidoethyl)-1-phenyl-3-(phenylethynyl)-1*H*-pyrazole (**9**). <sup>1</sup>H NMR spectrum (700 MHz, CDCl<sub>3</sub>).

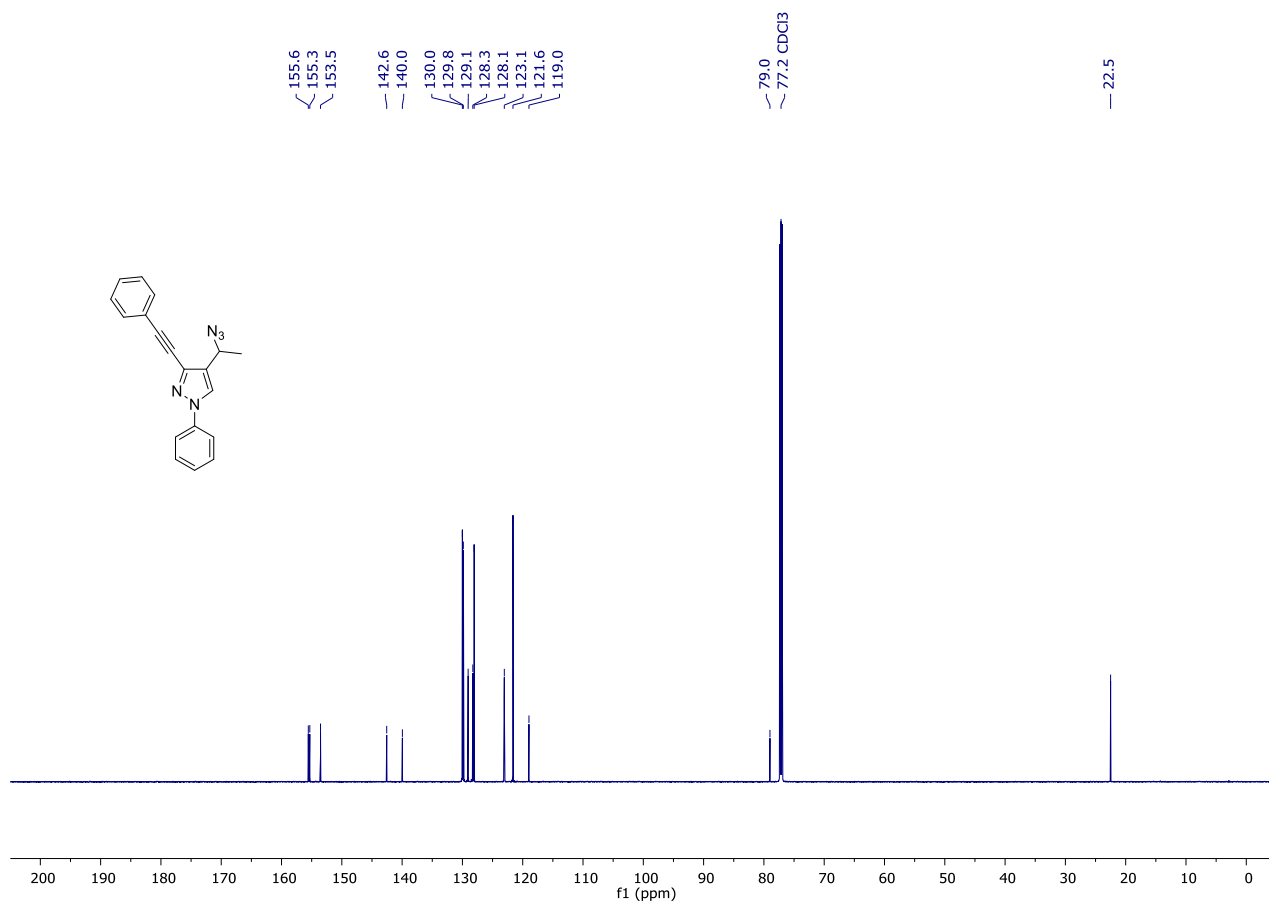

**Figure S20.** 4-(1-Azidoethyl)-1-phenyl-3-(phenylethynyl)-1H-pyrazole (**9**). <sup>13</sup>C NMR (176 MHz, CDCl<sub>3</sub>).

**+MS, 5.8min #345**

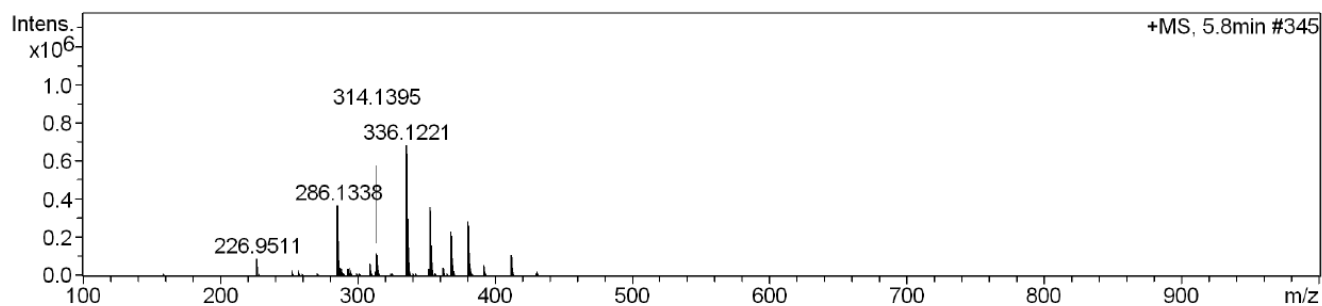

| Meas. m/z | # | Ion Formula                                       | m/z      | err [ppm] | mSigma | # Sigma | Score  | rdb  | e <sup>-</sup> Conf | N-Rule |
|-----------|---|---------------------------------------------------|----------|-----------|--------|---------|--------|------|---------------------|--------|
| 314.1395  | 1 | C <sub>19</sub> H <sub>16</sub> N <sub>5</sub>    | 314.1400 | -1.6      | 42.0   | 1       | 100.00 | 14.5 | even                | ok     |
| 336.1221  | 1 | C <sub>19</sub> H <sub>15</sub> N <sub>5</sub> Na | 336.1220 | -0.4      | 4.5    | 1       | 100.00 | 14.5 | even                | ok     |

**Figure S21.** 4-(1-Azidoethyl)-1-phenyl-3-(phenylethynyl)-1H-pyrazole (**9**). HRMS (ESI-TOF).

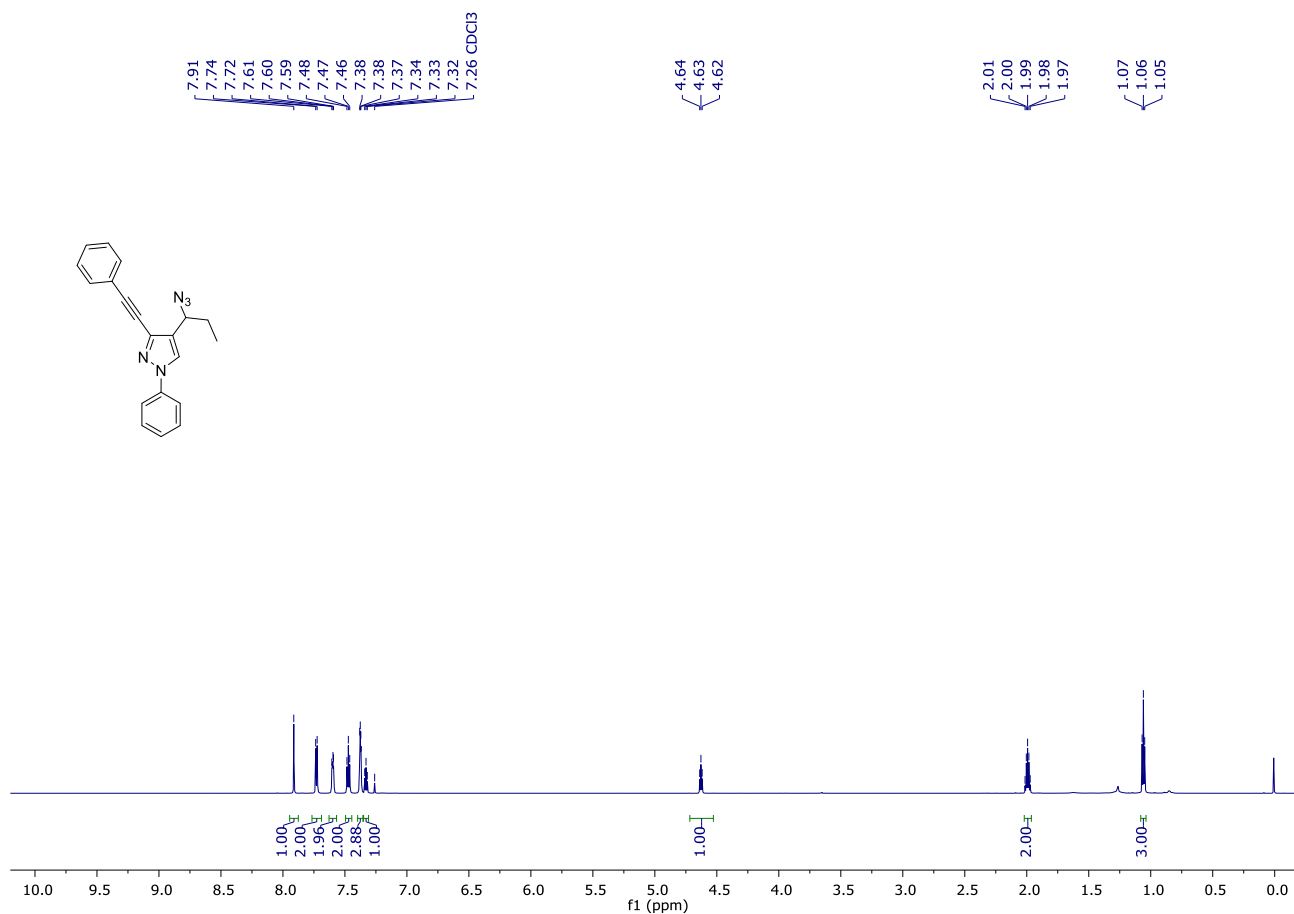

**Figure S22.** 4-(1-Azidopropyl)-1-phenyl-3-(phenylethynyl)-1*H*-pyrazole (**10**). <sup>1</sup>H NMR spectrum (700 MHz, CDCl<sub>3</sub>).

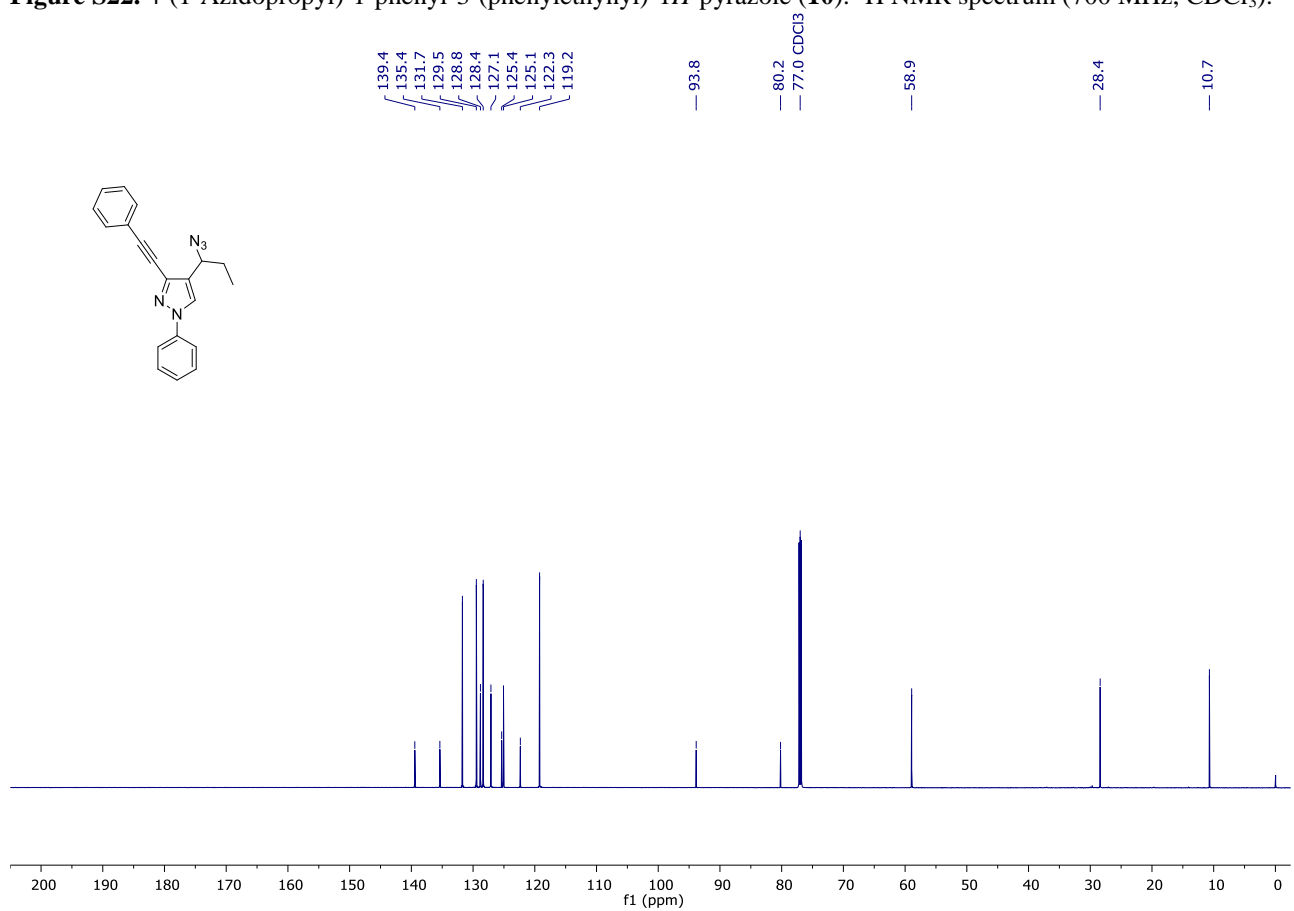

**Figure S23.** 4-(1-Azidopropyl)-1-phenyl-3-(phenylethynyl)-1*H*-pyrazole (**10**). <sup>13</sup>C NMR (176 MHz, CDCl<sub>3</sub>).

+MS, 6.0min #358

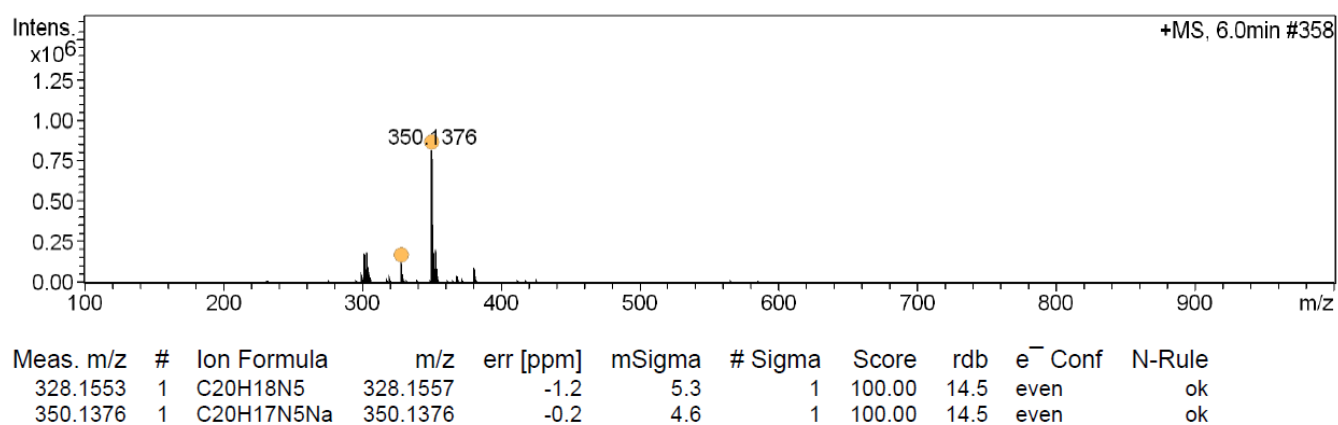

Figure S24. 2,6,7-Triphenyl-2*H*-pyrazolo[4,3-*c*]pyridine (**18**). HRMS (ESI-TOF).

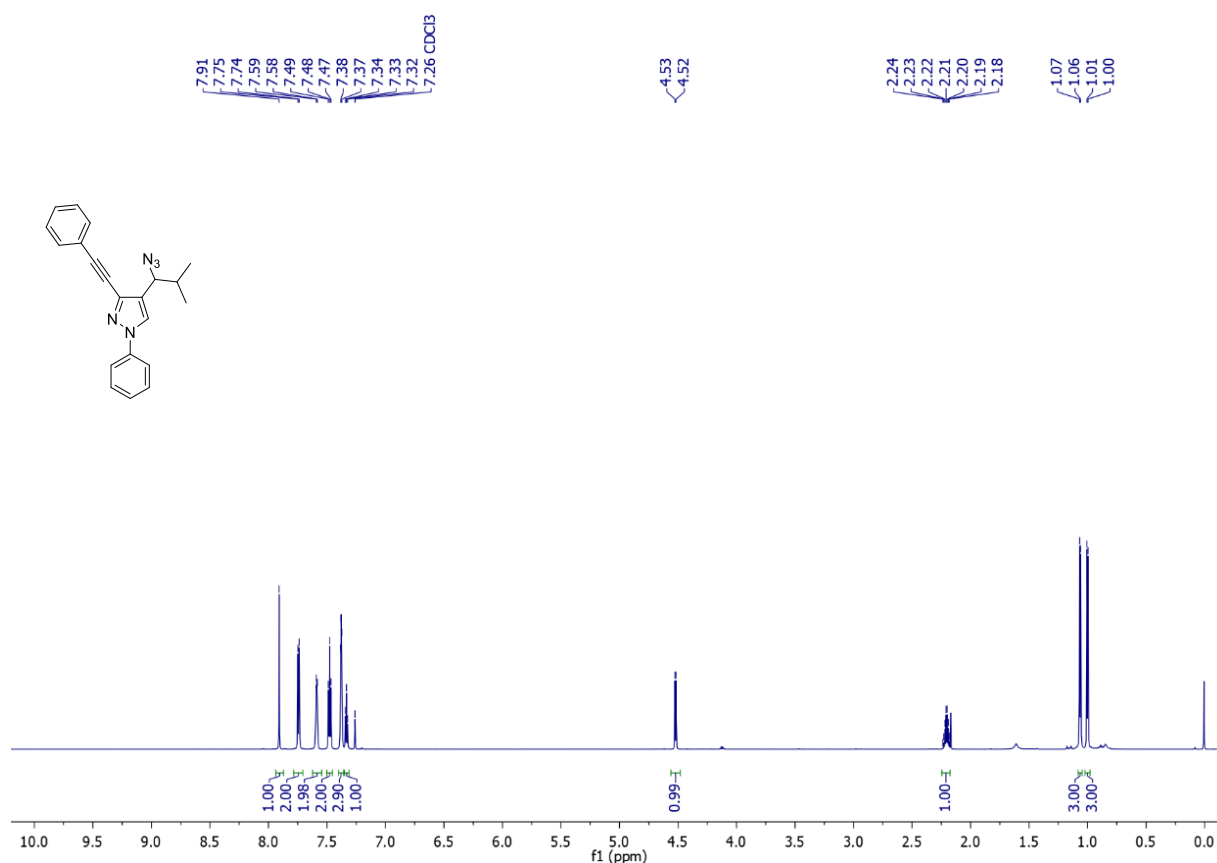

Figure S25. 4-(Azido-2-methylpropyl)-1-phenyl-3-(phenylethynyl)-1*H*-pyrazole (**11**). <sup>1</sup>H NMR spectrum (700 MHz, CDCl<sub>3</sub>).

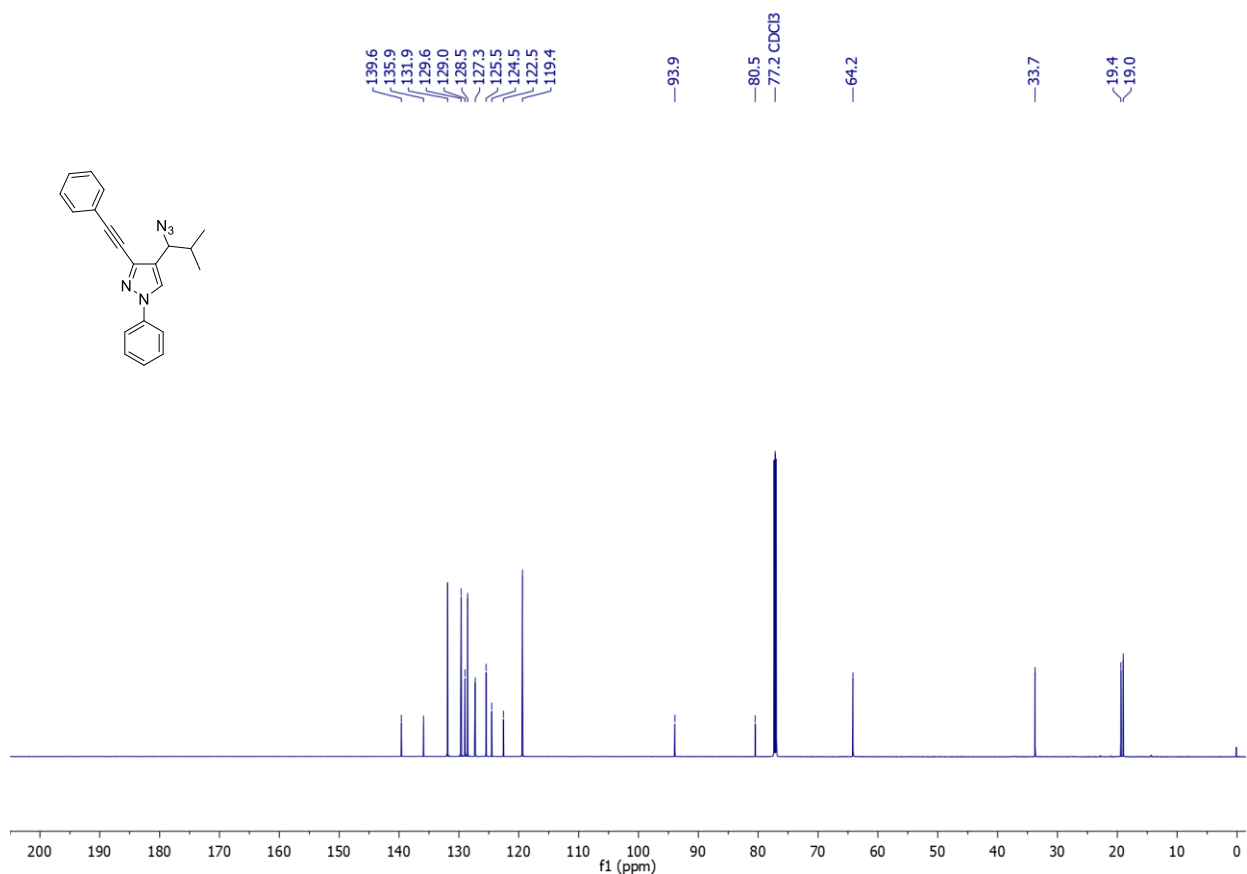

**Figure S26.** 4-(Azido-2-methylpropyl)-1-phenyl-3-(phenylethynyl)-1H-pyrazole (**11**). <sup>13</sup>C NMR (176 MHz, CDCl<sub>3</sub>).

**+MS, 5.3min #318**

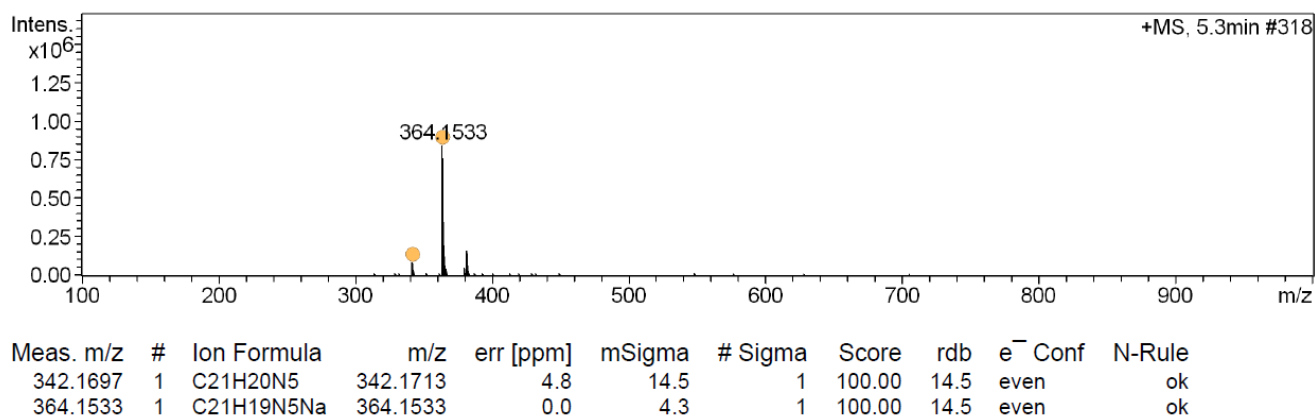

**Figure S27.** 4-(Azido-2-methylpropyl)-1-phenyl-3-(phenylethynyl)-1H-pyrazole (**11**). HRMS (ESI-TOF).

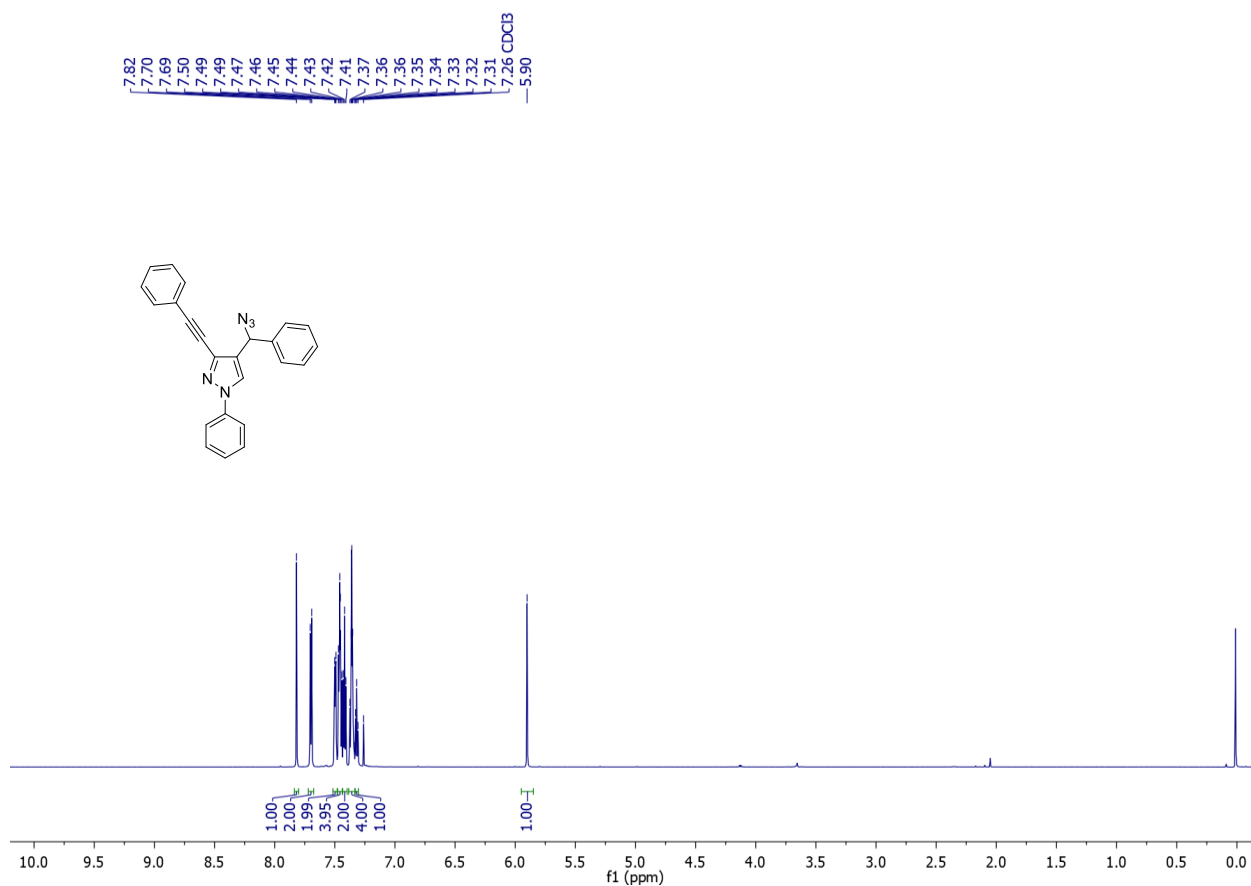

**Figure S28.** 4-(Azido(phenyl)methyl)-1-phenyl-3-(phenylethynyl)-1*H*-pyrazole (**12**). <sup>1</sup>H NMR spectrum (700 MHz, CDCl<sub>3</sub>).

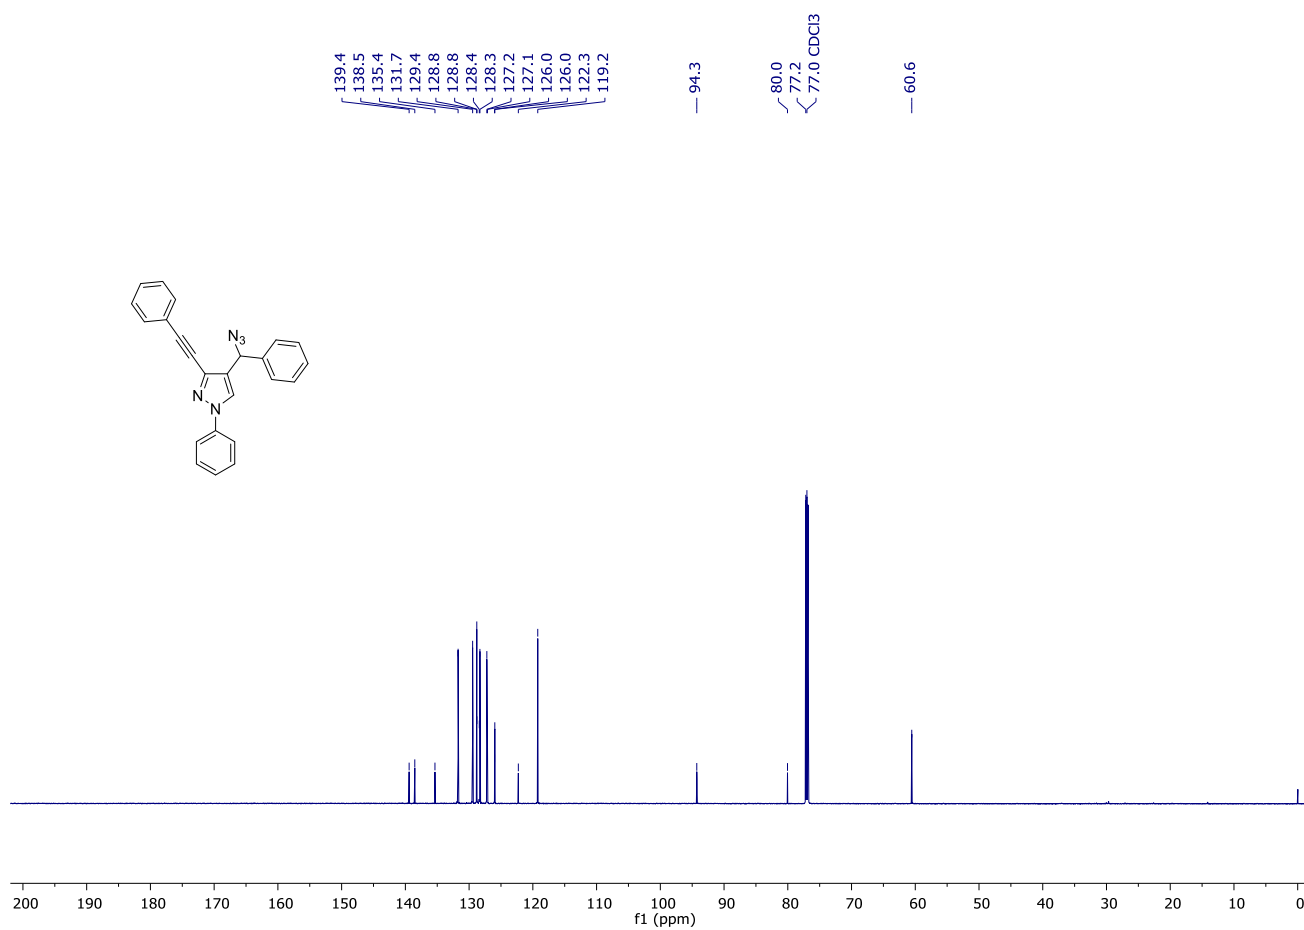

**Figure S29.** 4-(Azido(phenyl)methyl)-1-phenyl-3-(phenylethynyl)-1*H*-pyrazole (**12**). <sup>13</sup>C NMR (176 MHz, CDCl<sub>3</sub>).

+MS, 7.6min #457

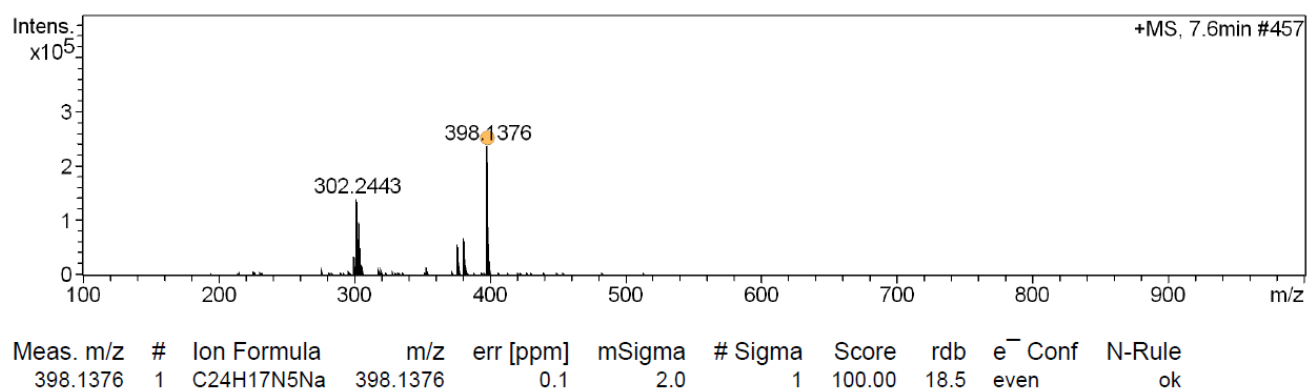

**Figure S30.** 4-(Azido(phenyl)methyl)-1-phenyl-3-(phenylethynyl)-1*H*-pyrazole (**12**). HRMS (ESI-TOF).

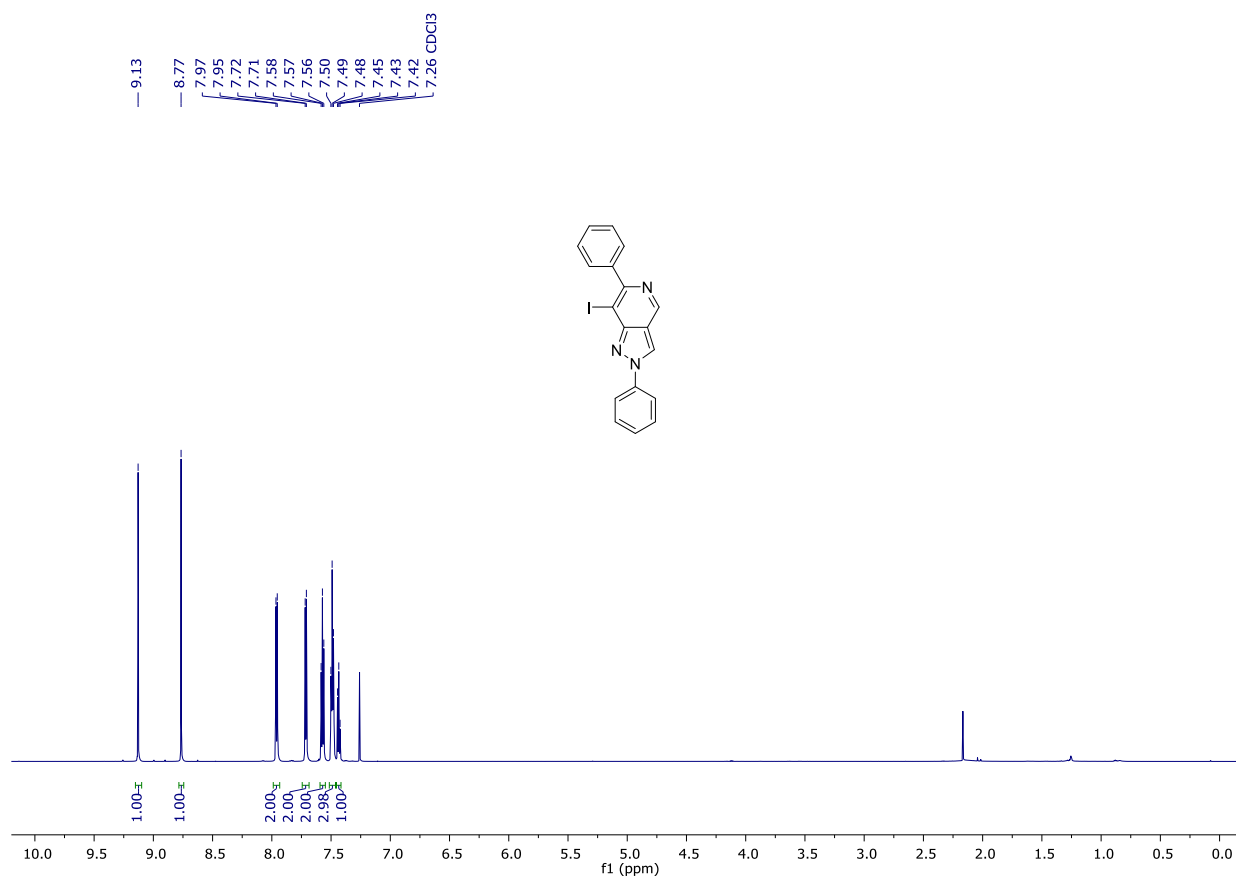

**Figure S31.** 7-Iodo-2,6-diphenyl-2*H*-pyrazolo[4,3-*c*]pyridine (**13**). <sup>1</sup>H NMR spectrum (700 MHz, CDCl<sub>3</sub>).



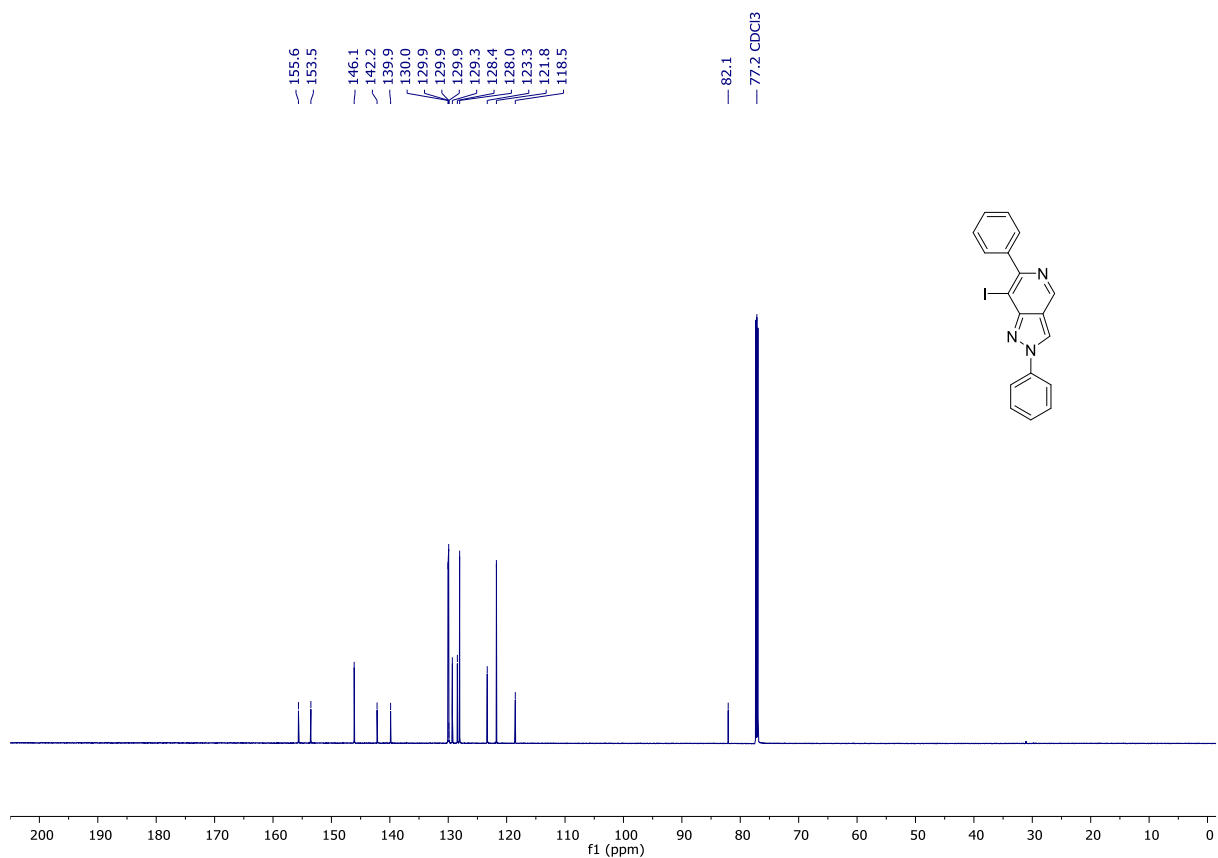

**Figure S32.** 7-Iodo-2,6-diphenyl-2H-pyrazolo[4,3-c]pyridine (**13**). <sup>13</sup>C NMR (176 MHz, CDCl<sub>3</sub>).

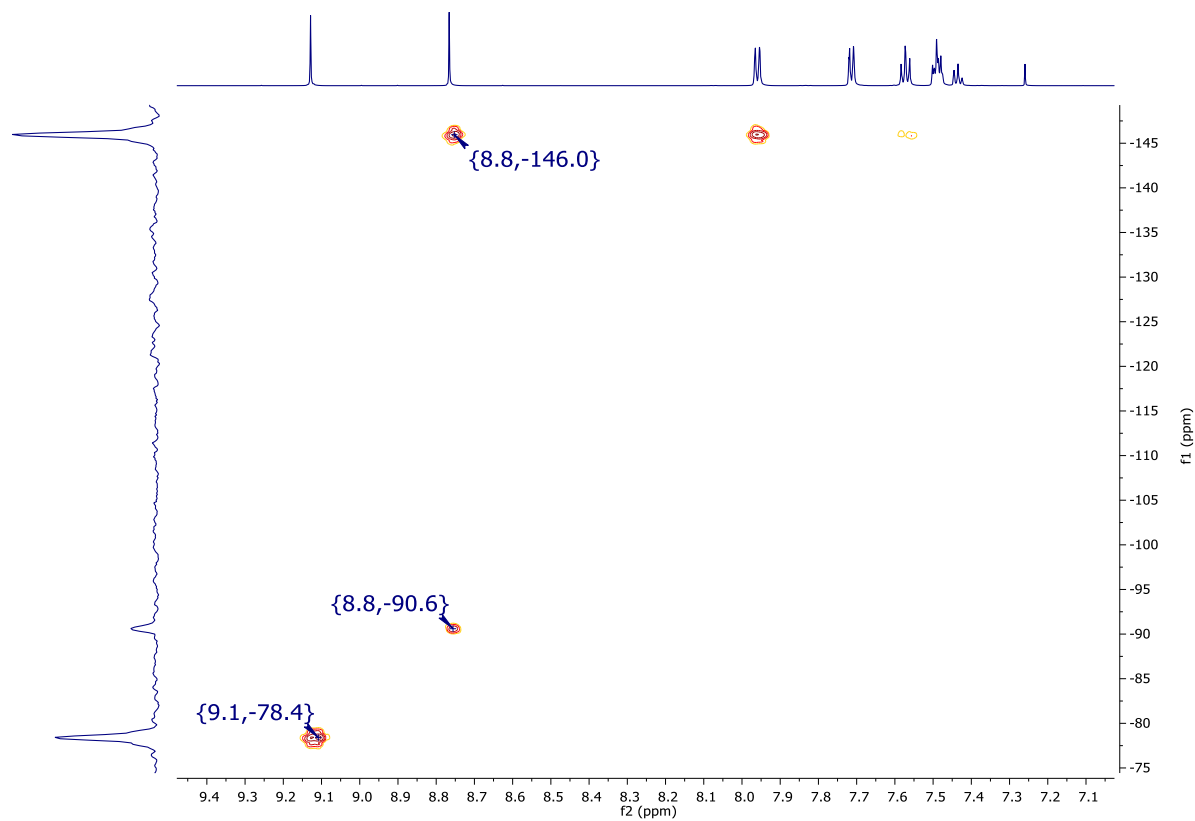

**Figure S33.** 7-Iodo-2,6-diphenyl-2H-pyrazolo[4,3-c]pyridine (**13**). <sup>1</sup>H-<sup>15</sup>N HMBC spectrum (700 MHz, CDCl<sub>3</sub>).

+MS, 4.4min #264

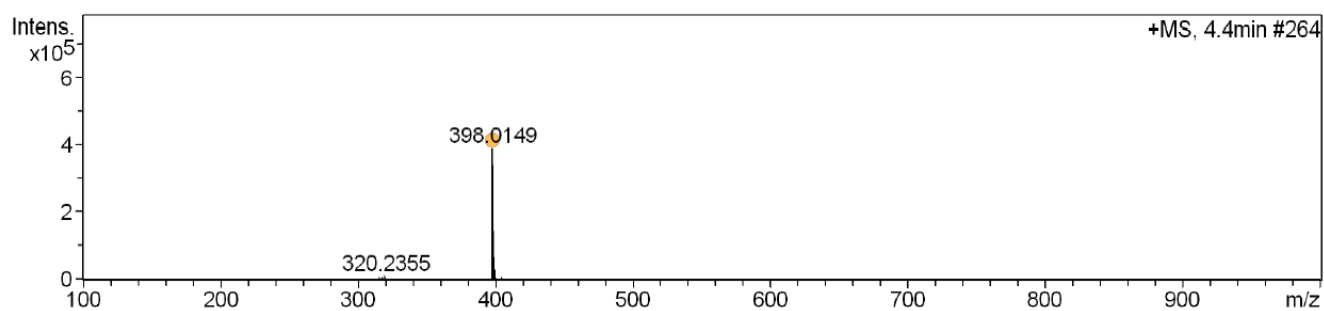

**Figure S34.** 7-Iodo-2,6-diphenyl-2*H*-pyrazolo[4,3-*c*]pyridine (**13**). HRMS (ESI-TOF).

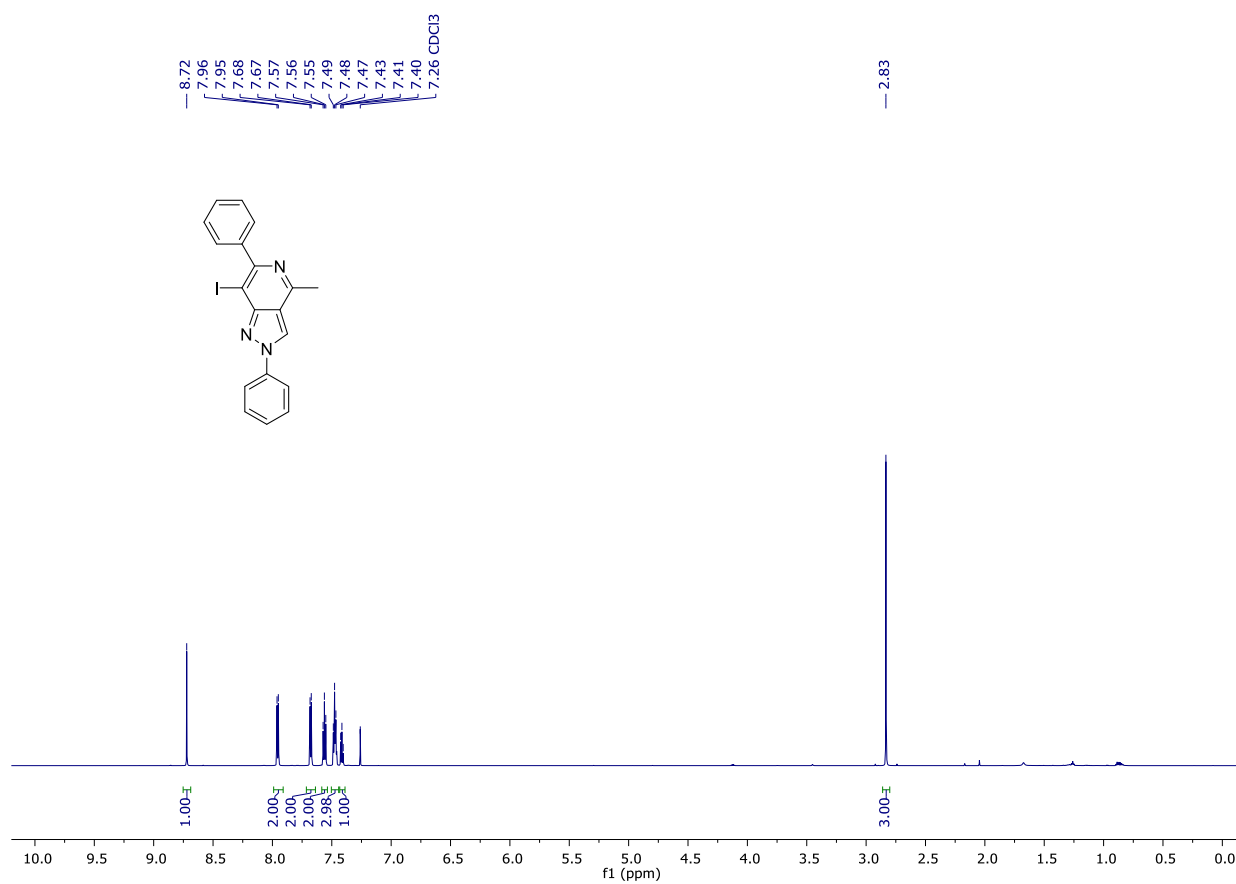

**Figure S35.** 7-Iodo-4-methyl-2,6-diphenyl-2*H*-pyrazolo[4,3-*c*]pyridine (**14**). <sup>1</sup>H NMR spectrum (700 MHz, CDCl<sub>3</sub>).

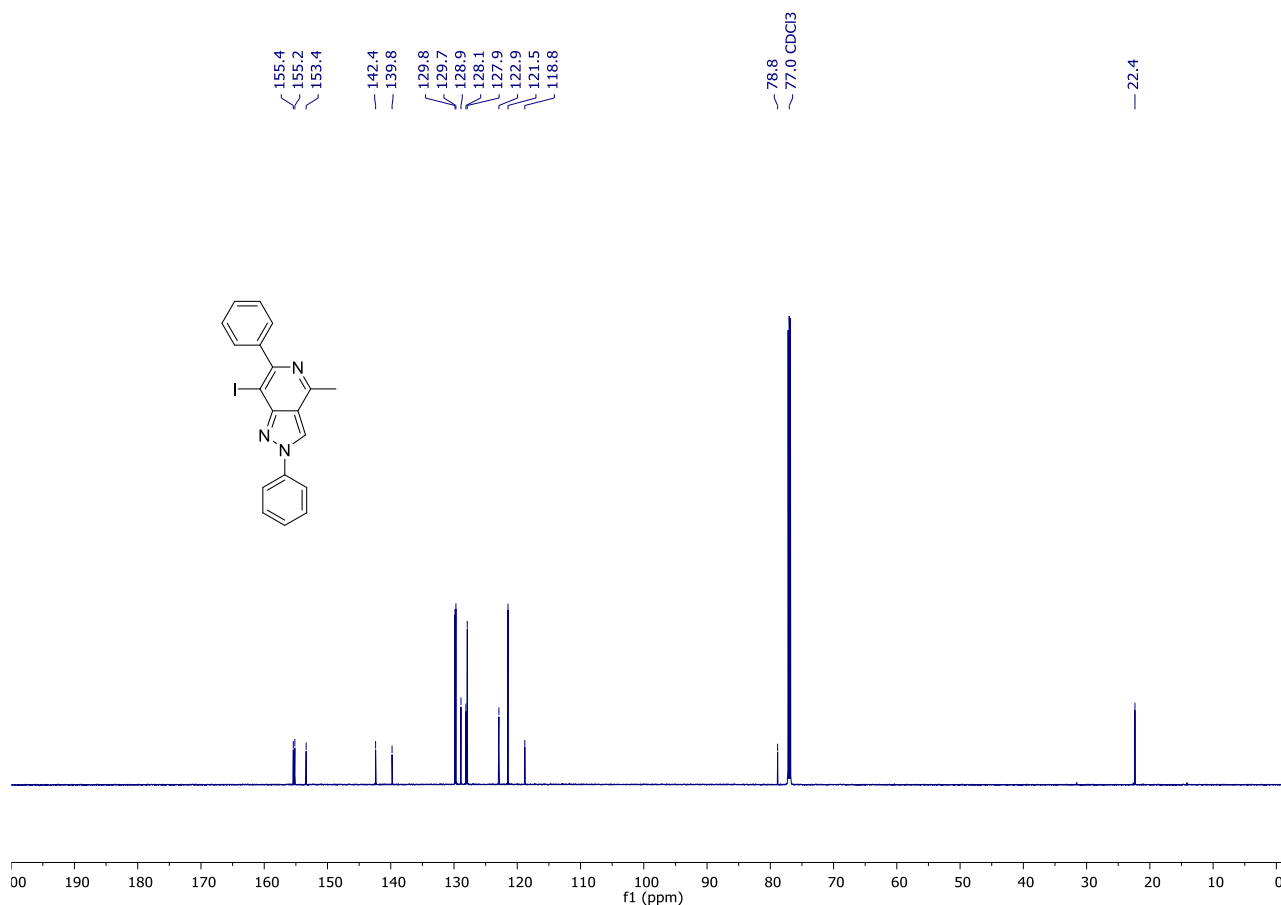

**Figure S36.** 7-Iodo-4-methyl-2,6-diphenyl-2H-pyrazolo[4,3-c]pyridine (**14**). <sup>13</sup>C NMR (176 MHz, CDCl<sub>3</sub>).

**+MS, 4.2min #252**

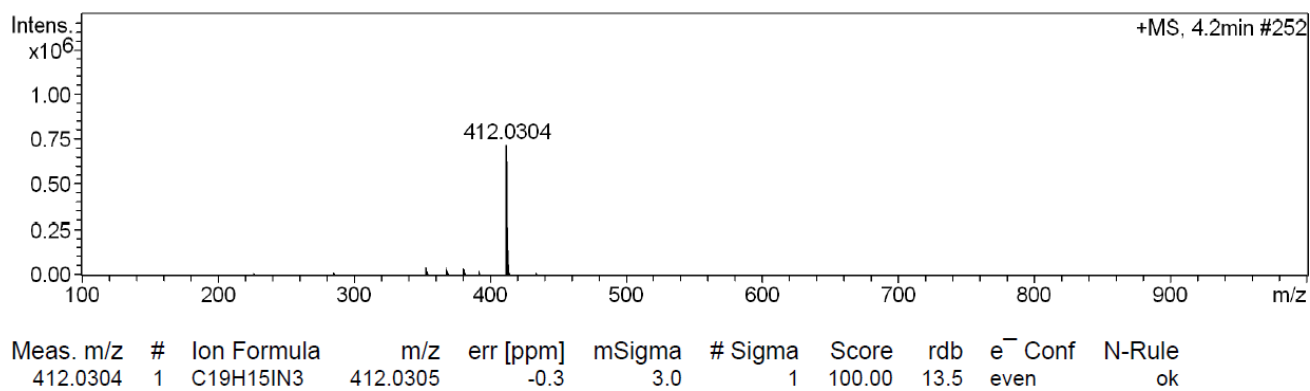

**Figure S37.** 7-Iodo-4-methyl-2,6-diphenyl-2H-pyrazolo[4,3-c]pyridine (**14**). HRMS (ESI-TOF).

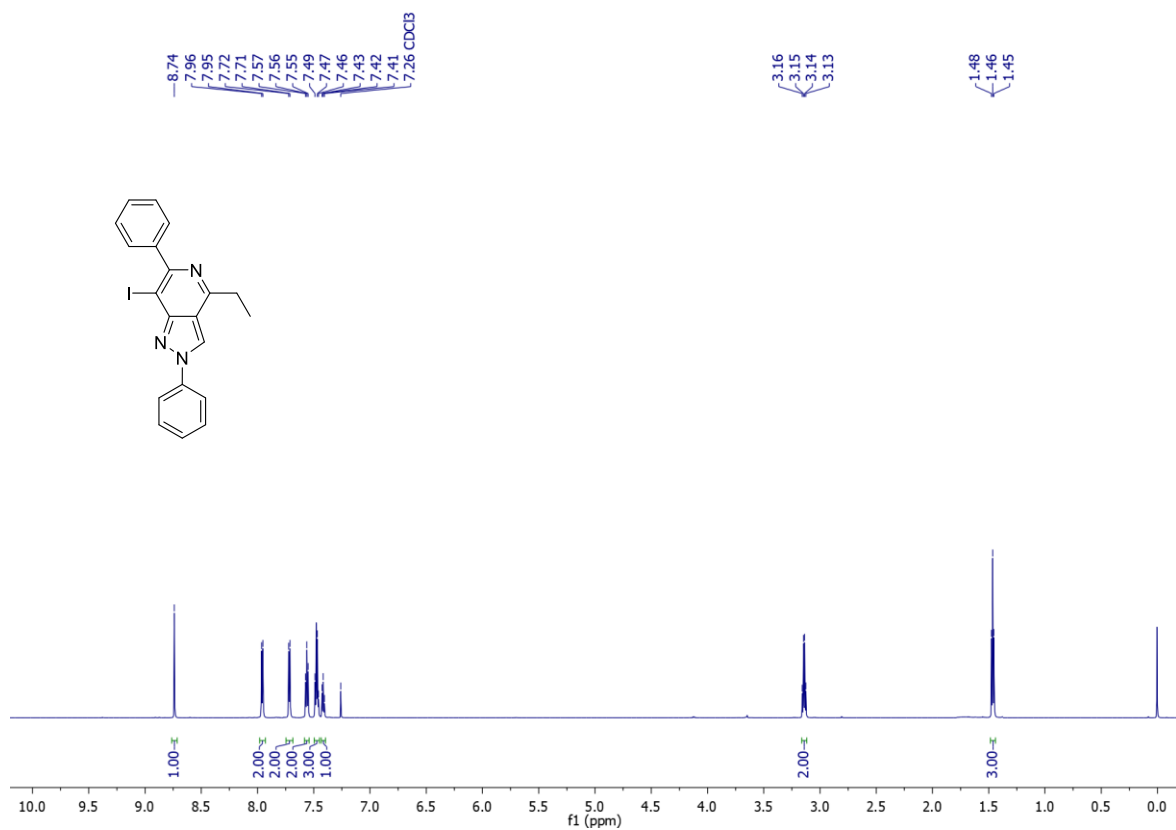

**Figure S38.** 4-Ethyl-7-iodo-2,6-diphenyl-2H-pyrazolo[4,3-c]pyridine (**15**). <sup>1</sup>H NMR spectrum (700 MHz, CDCl<sub>3</sub>).

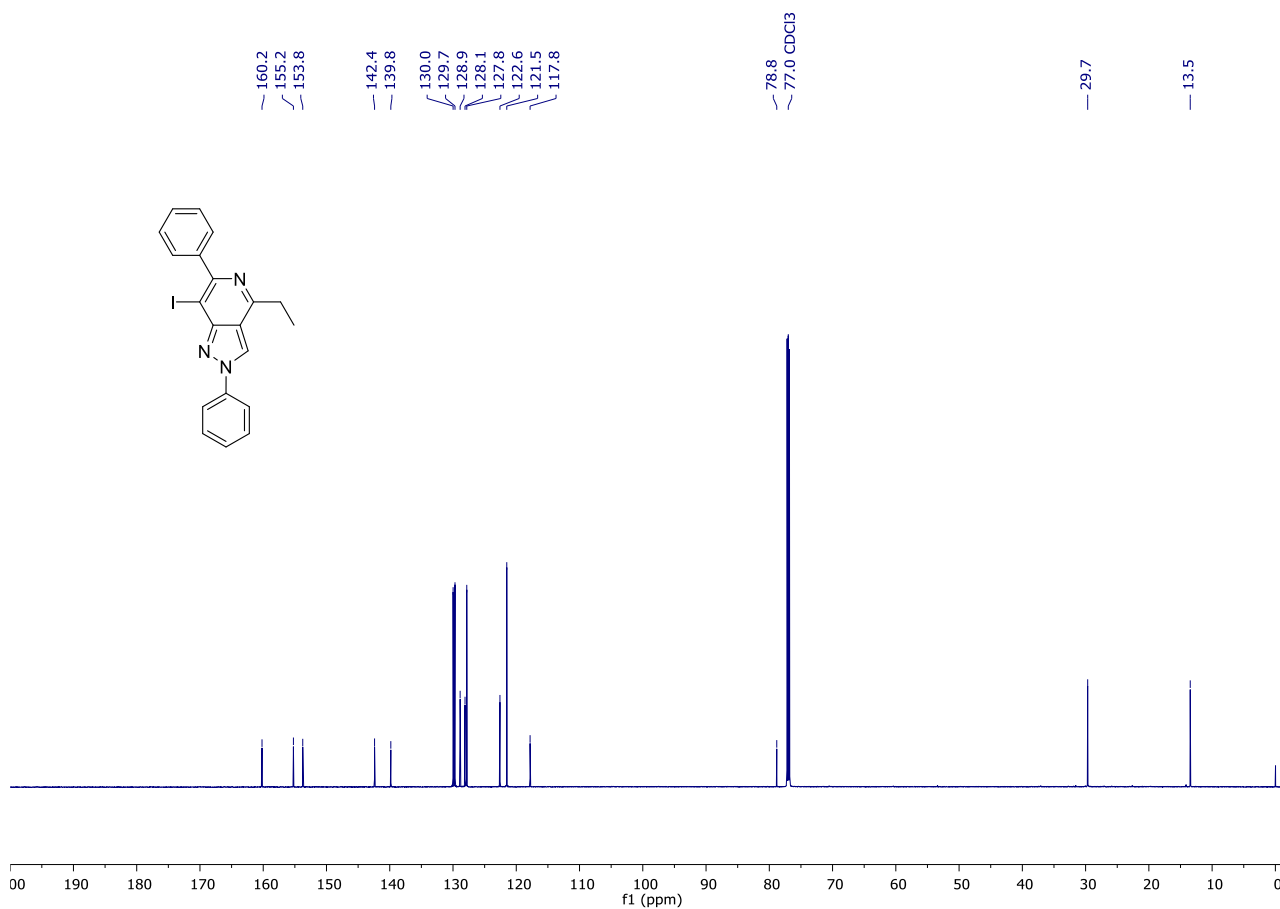

**Figure S39.** 4-Ethyl-7-iodo-2,6-diphenyl-2H-pyrazolo[4,3-c]pyridine (**15**). <sup>13</sup>C NMR (176 MHz, CDCl<sub>3</sub>).

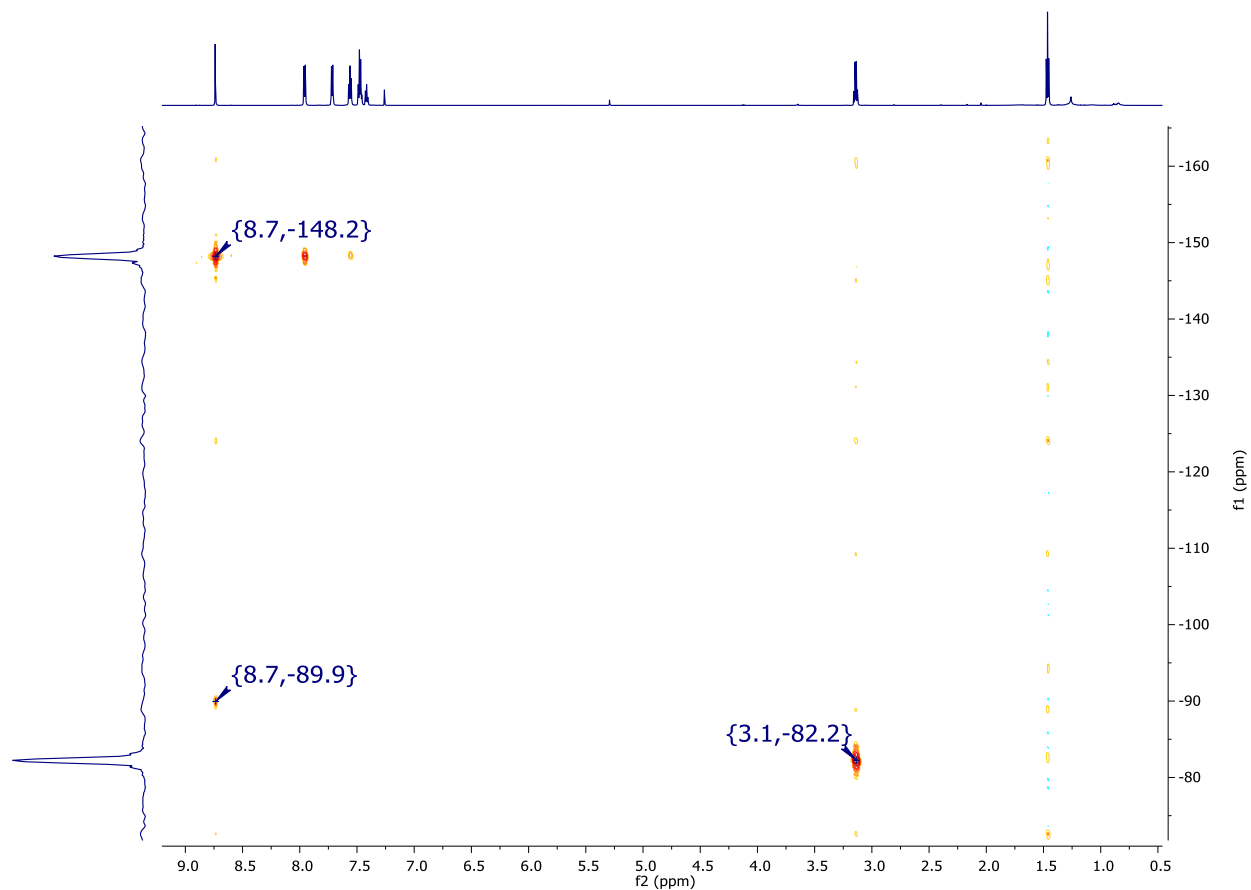

**Figure S40.** 4-Ethyl-7-iodo-2,6-diphenyl-2*H*-pyrazolo[4,3-*c*]pyridine (**15**).  $^1\text{H}$ - $^{15}\text{N}$  HMBC spectrum (700 MHz,  $\text{CDCl}_3$ )

**+MS, 4.7min #279**

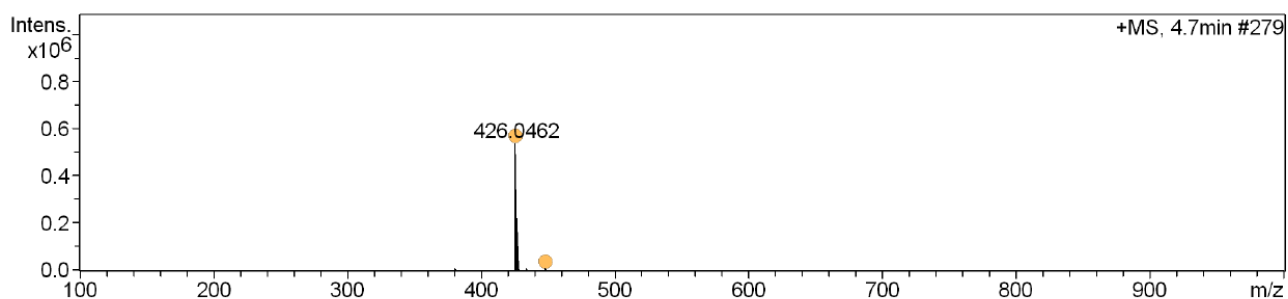

| Meas. m/z | # | Ion Formula                                        | m/z      | err [ppm] | mSigma | # Sigma | Score  | rdb  | e <sup>-</sup> Conf | N-Rule |
|-----------|---|----------------------------------------------------|----------|-----------|--------|---------|--------|------|---------------------|--------|
| 426.0462  | 1 | C <sub>20</sub> H <sub>17</sub> IN <sub>3</sub>    | 426.0462 | 0.0       | 1.6    | 1       | 100.00 | 13.5 | even                | ok     |
| 448.0274  | 1 | C <sub>20</sub> H <sub>16</sub> IN <sub>3</sub> Na | 448.0281 | -1.7      | 14.6   | 1       | 100.00 | 13.5 | even                | ok     |

**Figure S41.** 4-Ethyl-7-iodo-2,6-diphenyl-2*H*-pyrazolo[4,3-*c*]pyridine (**15**). HRMS (ESI-TOF).



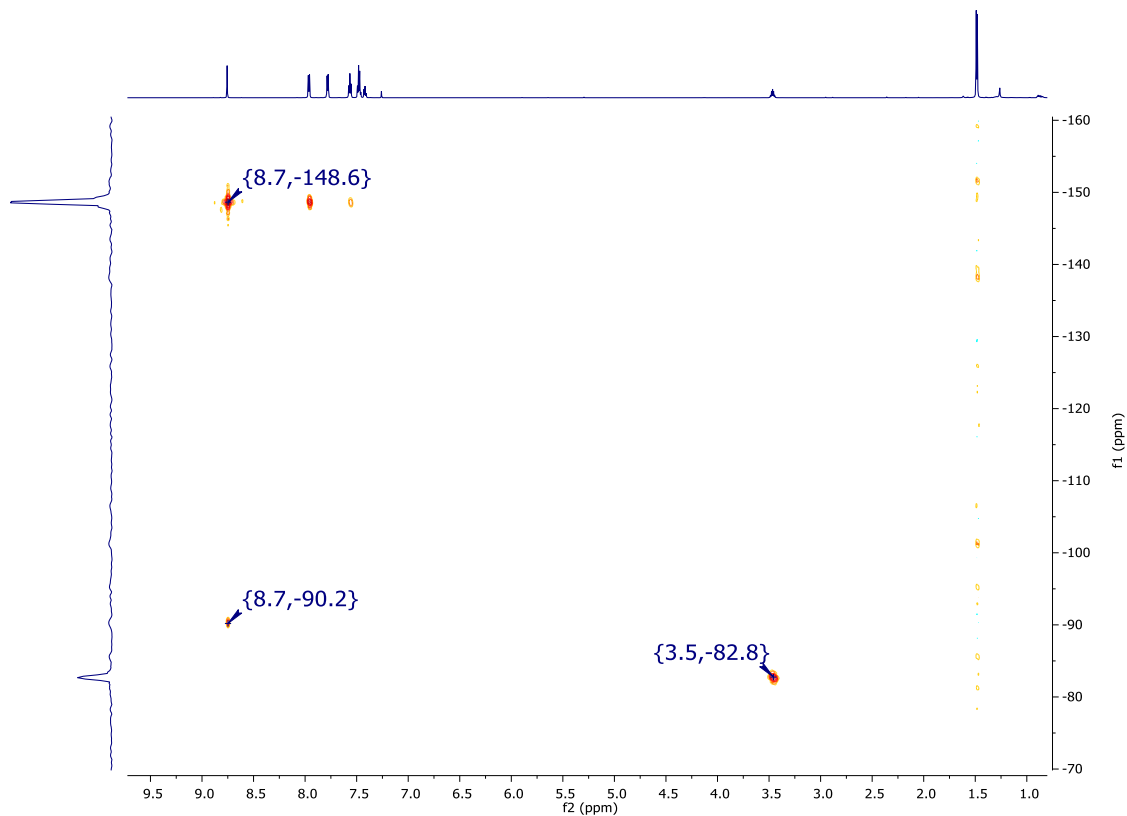

**Figure S44.** 7-Iodo-4-isopropyl-2,6-diphenyl-2*H*-pyrazolo[4,3-*c*]pyridine (**16**).  $^1\text{H}$ - $^{15}\text{N}$  HMBC spectrum (700 MHz,  $\text{CDCl}_3$ )

**+MS, 5.8min #347**

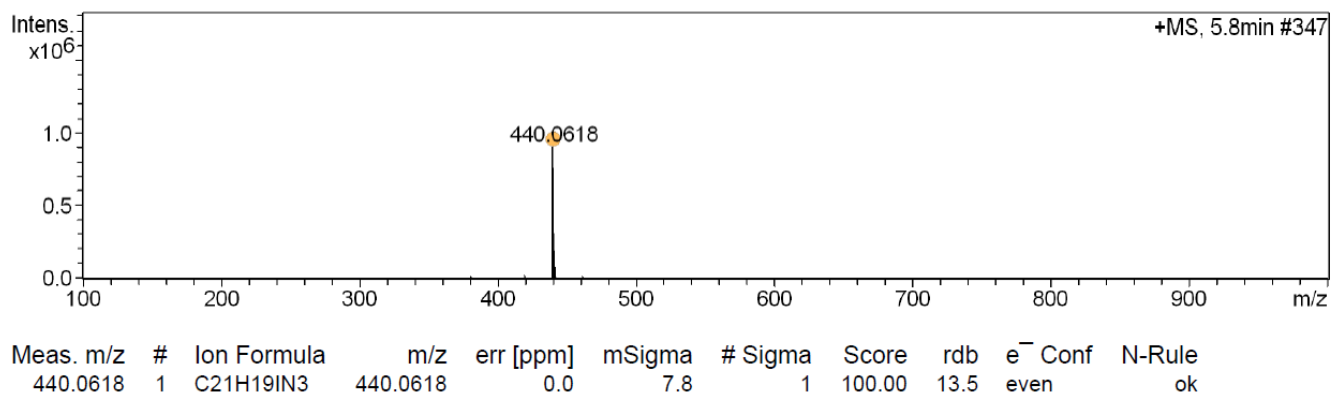

**Figure S45.** 7-Iodo-4-isopropyl-2,6-diphenyl-2*H*-pyrazolo[4,3-*c*]pyridine (**16**). HRMS (ESI-TOF).

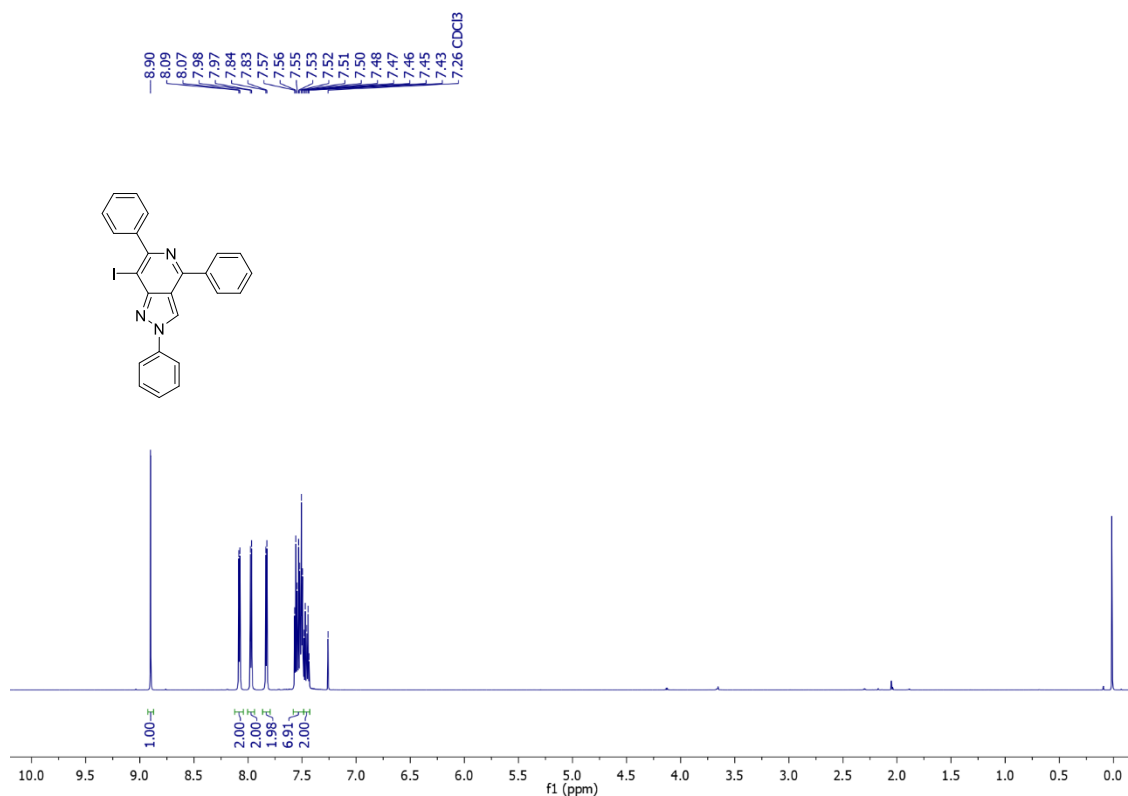

**Figure S46.** 7-Iodo-2,4,6-triphenyl-2H-pyrazolo[4,3-c]pyridine (**17**). <sup>1</sup>H NMR spectrum (700 MHz, CDCl<sub>3</sub>).

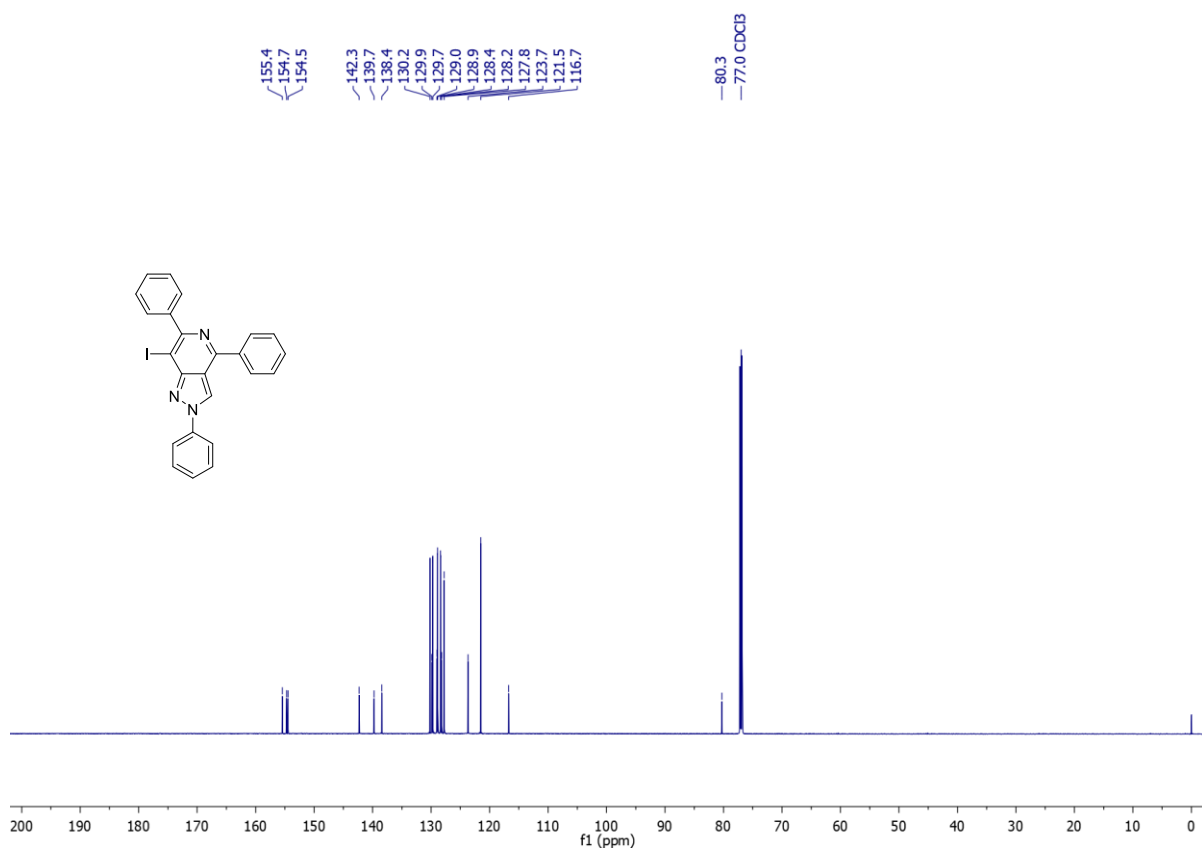

**Figure S47.** 7-Iodo-2,4,6-triphenyl-2H-pyrazolo[4,3-c]pyridine (**17**). <sup>13</sup>C NMR (176 MHz, CDCl<sub>3</sub>).



+MS, 3.5min #212

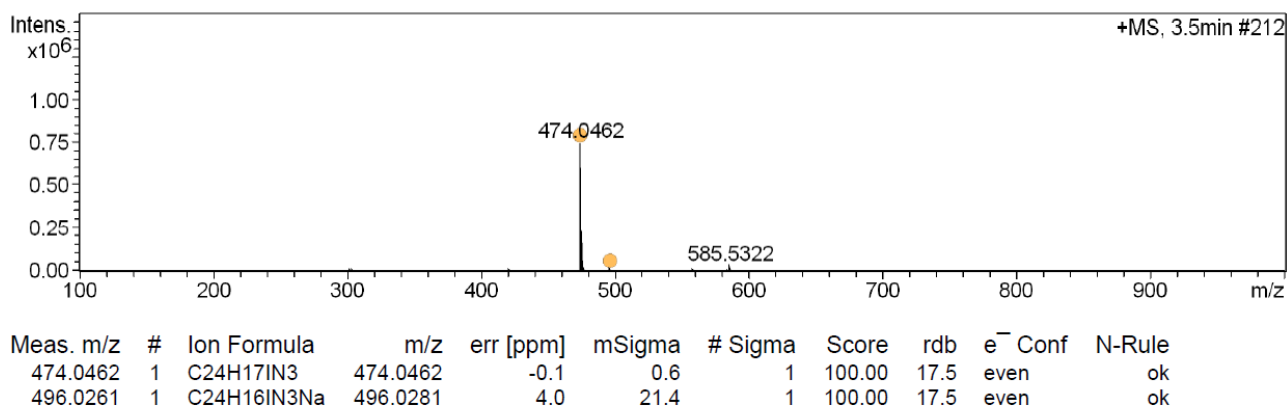

**Figure S48.** 7-Iodo-2,4,6-triphenyl-2H-pyrazolo[4,3-c]pyridine (**17**). HRMS (ESI-TOF).

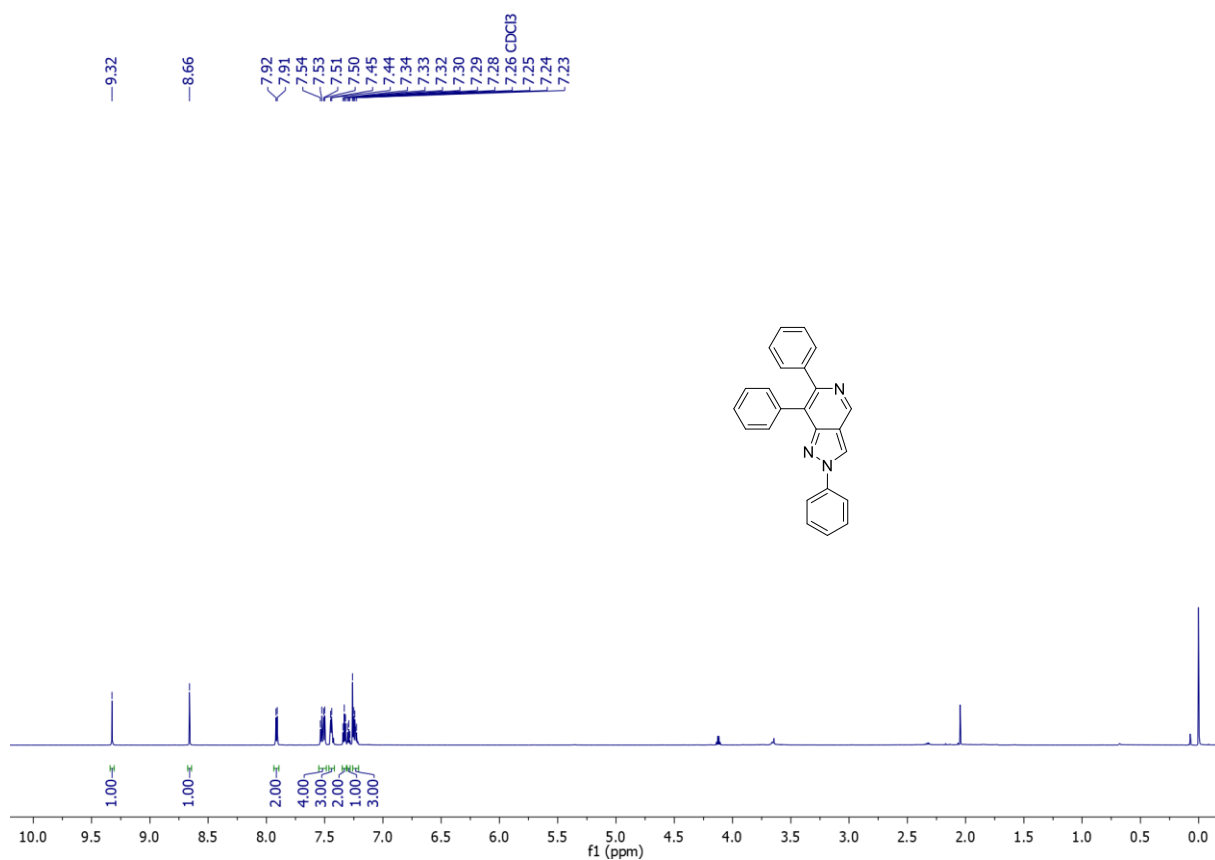

**Figure S49.** 2,6,7-Triphenyl-2H-pyrazolo[4,3-c]pyridine (**18**). <sup>1</sup>H NMR spectrum (700 MHz, CDCl<sub>3</sub>).

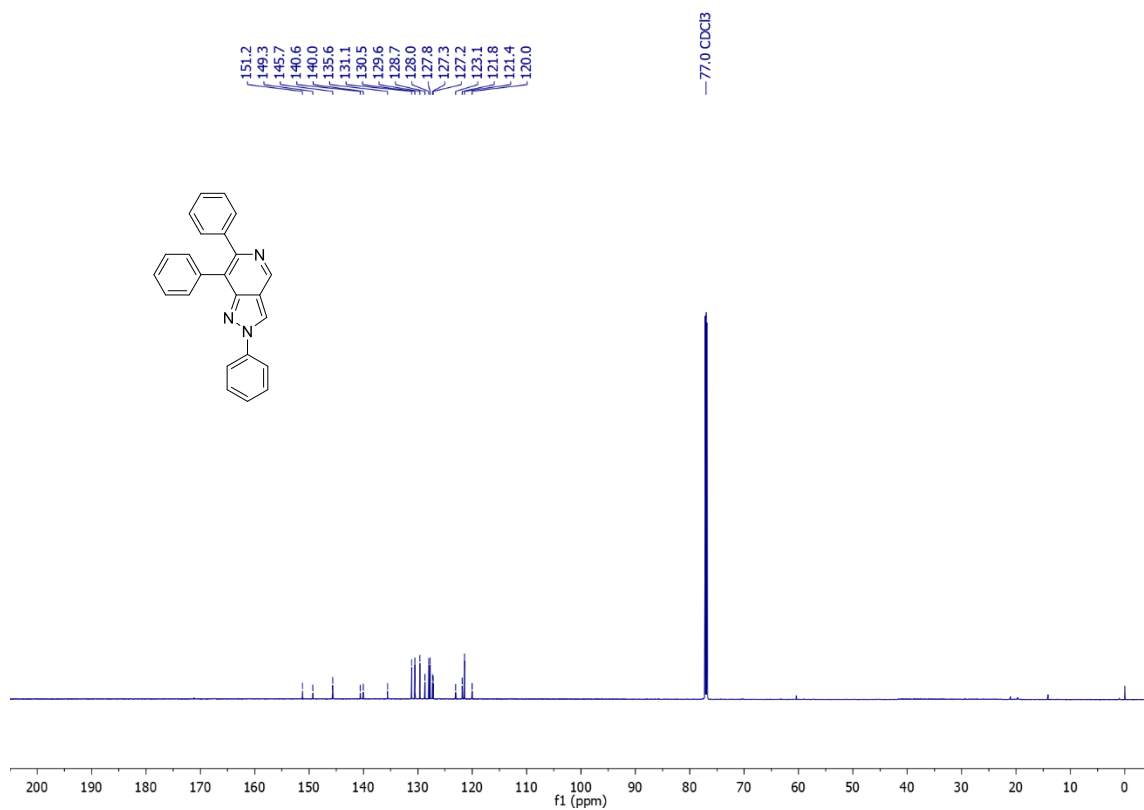

**Figure S50.** 2,6,7-Triphenyl-2H-pyrazolo[4,3-*c*]pyridine (**18**). <sup>13</sup>C NMR (176 MHz, CDCl<sub>3</sub>).

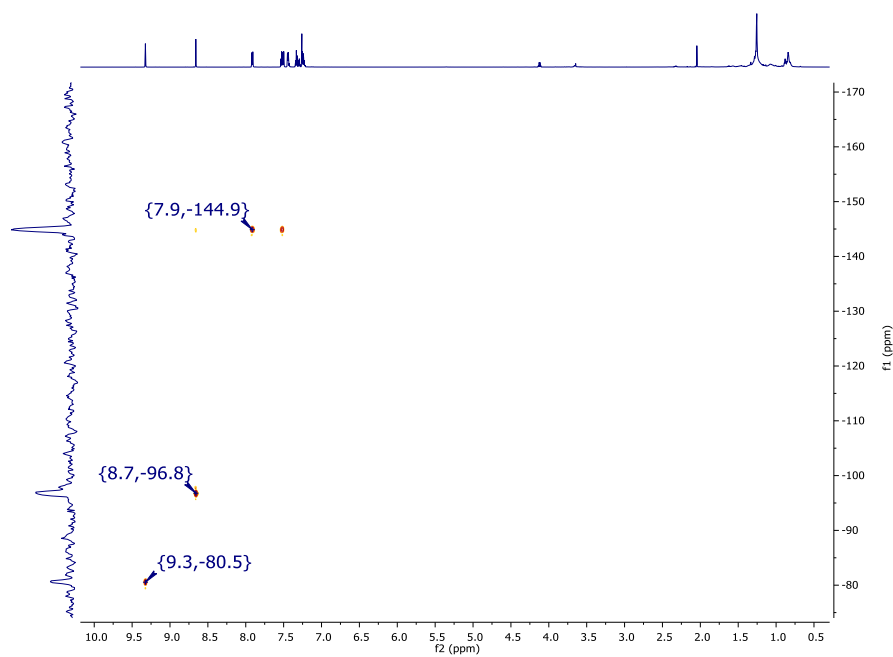

**Figure S51.** 2,6,7-Triphenyl-2H-pyrazolo[4,3-*c*]pyridine (**18**). <sup>1</sup>H-<sup>15</sup>N LR-HSQC spectrum (700 MHz, CDCl<sub>3</sub>).

+MS, 7.6min #457

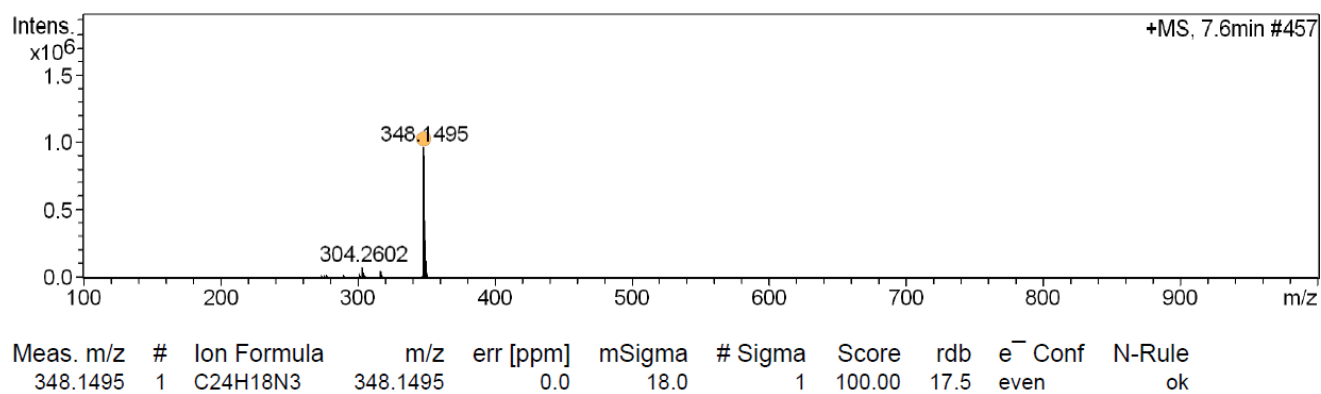

**Figure S52.** 2,6,7-Triphenyl-2H-pyrazolo[4,3-c]pyridine (**18**). HRMS (ESI-TOF).

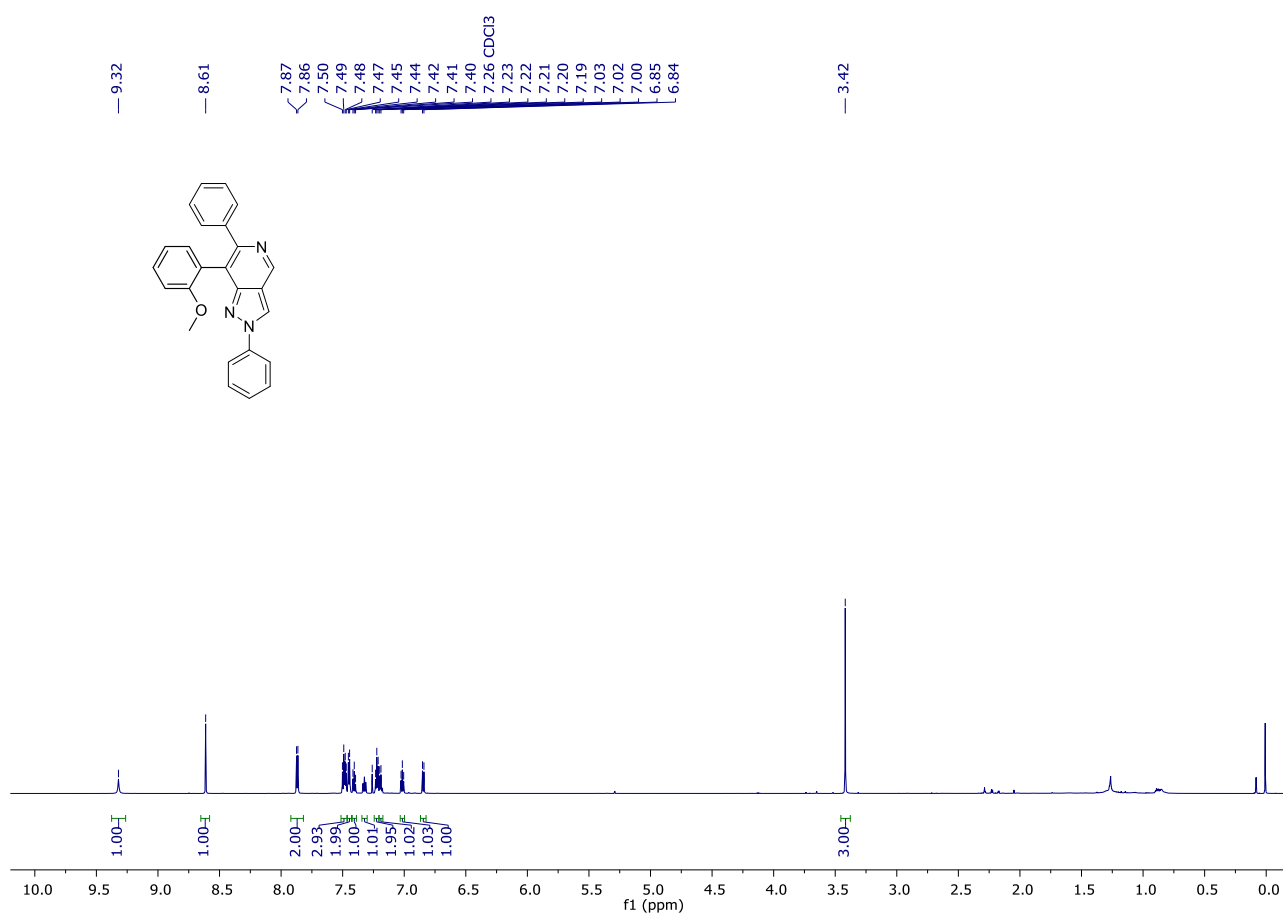

**Figure S53.** 7-(2-Methoxyphenyl)-2,6-diphenyl-2H-pyrazolo[4,3-c]pyridine (**19**). <sup>1</sup>H NMR spectrum (700 MHz, CDCl<sub>3</sub>).

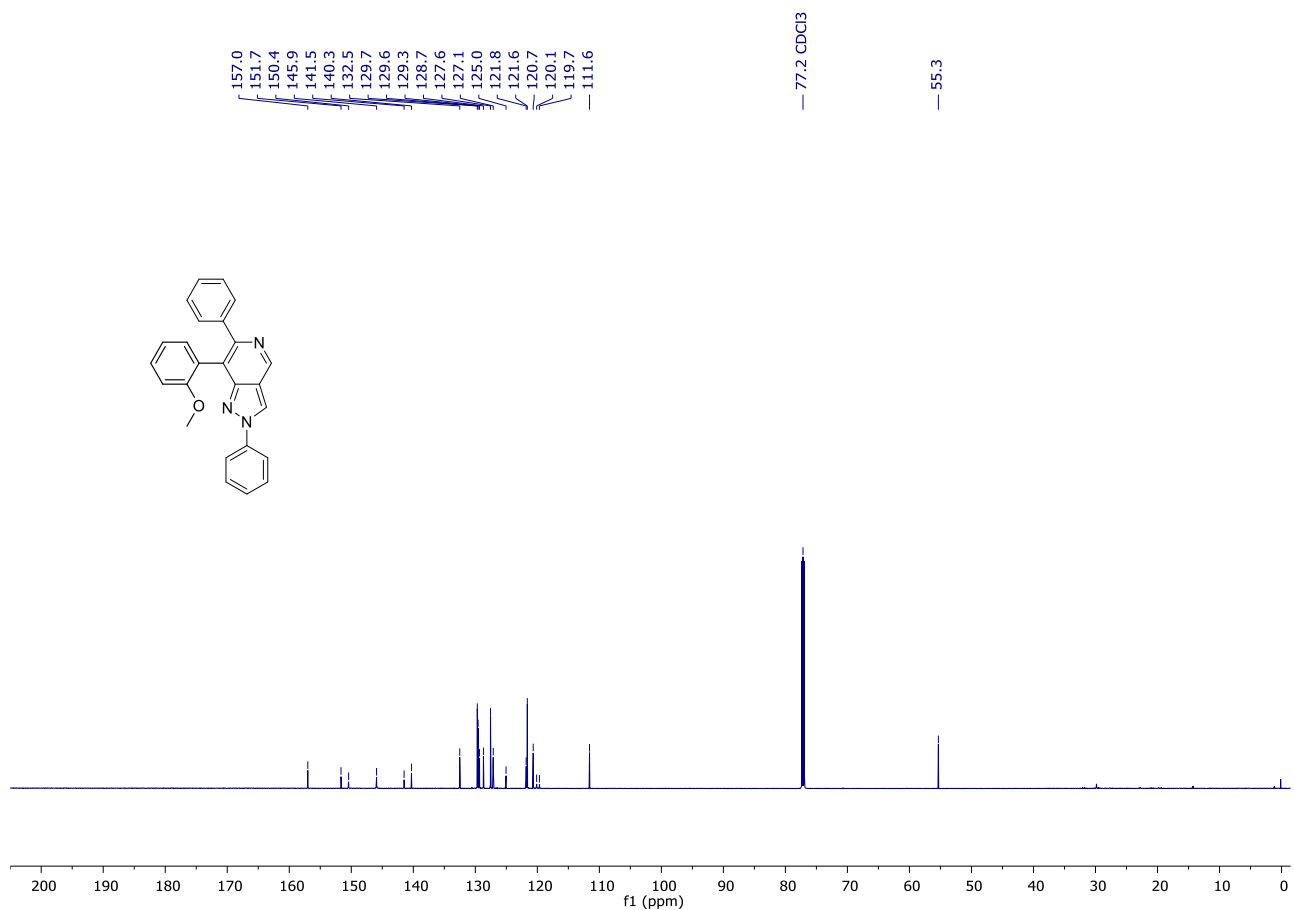

**Figure S54.** 7-(2-Methoxyphenyl)-2,6-diphenyl-2H-pyrazolo[4,3-c]pyridine (**19**). <sup>13</sup>C NMR (176 MHz, CDCl<sub>3</sub>).

**+MS, 5.2min #309**

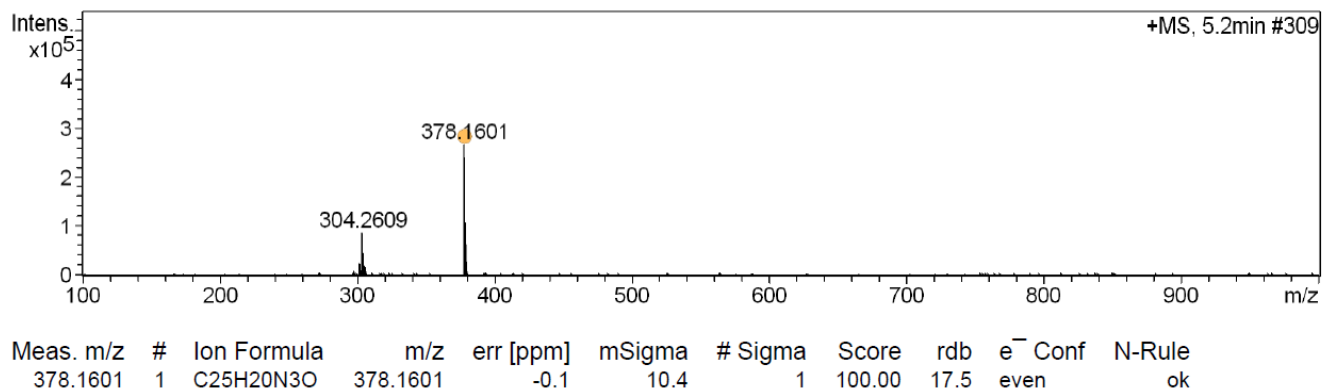

**Figure S55.** 7-(2-Methoxyphenyl)-2,6-diphenyl-2H-pyrazolo[4,3-c]pyridine (**19**). HRMS (ESI-TOF).

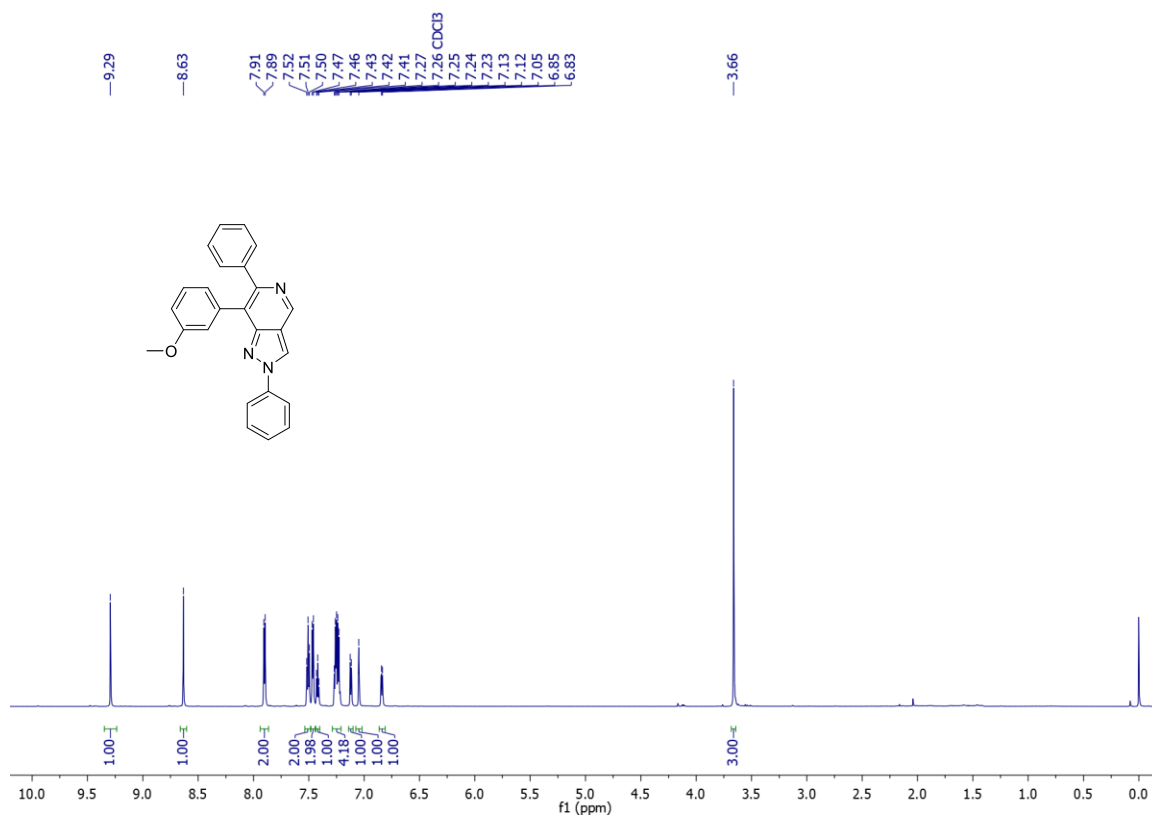

**Figure S56.** 7-(3-Methoxyphenyl)-2,6-diphenyl-2*H*-pyrazolo[4,3-*c*]pyridine (**20**). <sup>1</sup>H NMR spectrum (700 MHz, CDCl<sub>3</sub>).

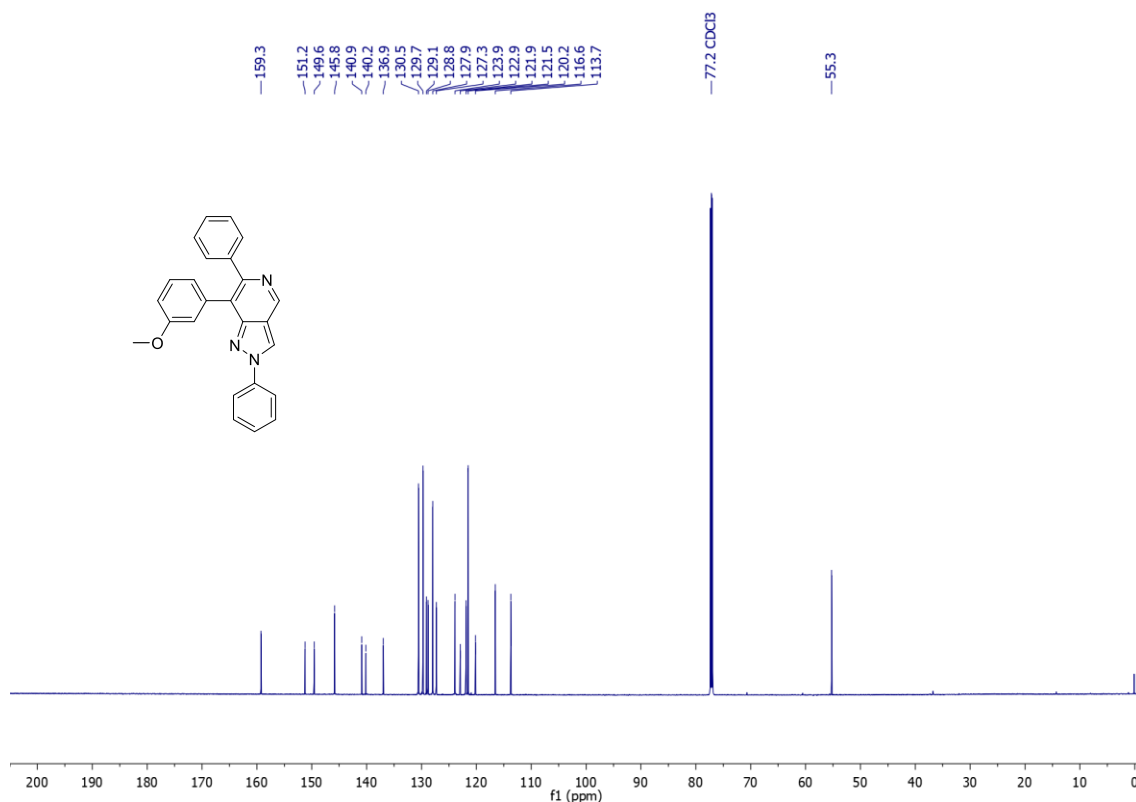

**Figure S57.** 7-(3-Methoxyphenyl)-2,6-diphenyl-2*H*-pyrazolo[4,3-*c*]pyridine (**20**). <sup>13</sup>C NMR (176 MHz, CDCl<sub>3</sub>).

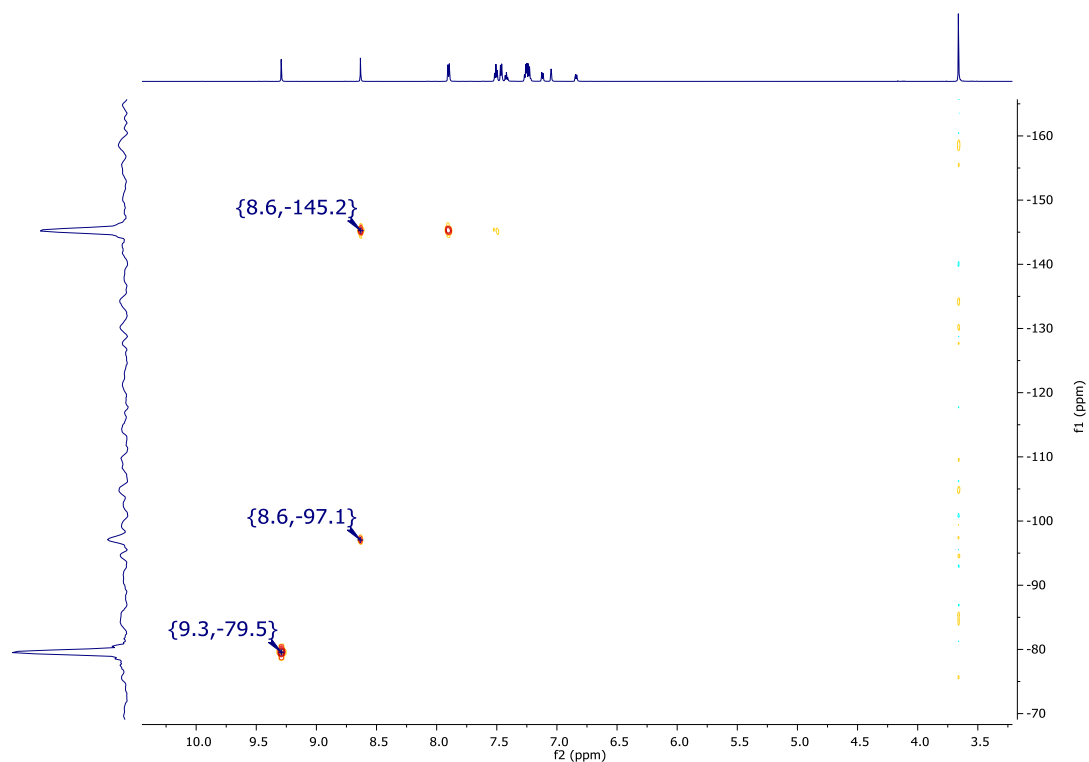

**Figure S58.** 7-(3-Methoxyphenyl)-2,6-diphenyl-2*H*-pyrazolo[4,3-*c*]pyridine (**20**). <sup>1</sup>H-<sup>15</sup>N HMBC spectrum (700 MHz, CDCl<sub>3</sub>).

**+MS, 3.8min #225**

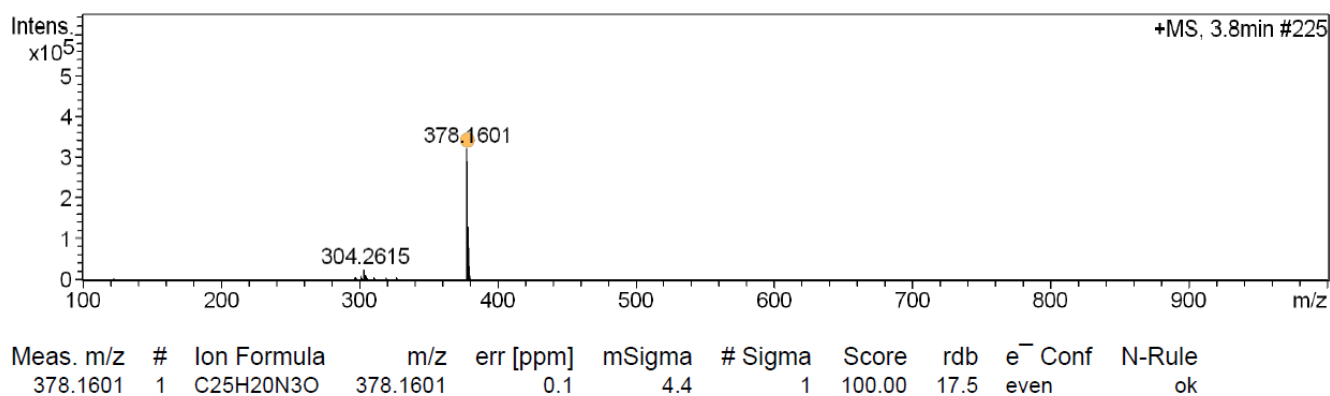

**Figure S59.** 7-(3-Methoxyphenyl)-2,6-diphenyl-2*H*-pyrazolo[4,3-*c*]pyridine (**20**). HRMS (ESI-TOF).

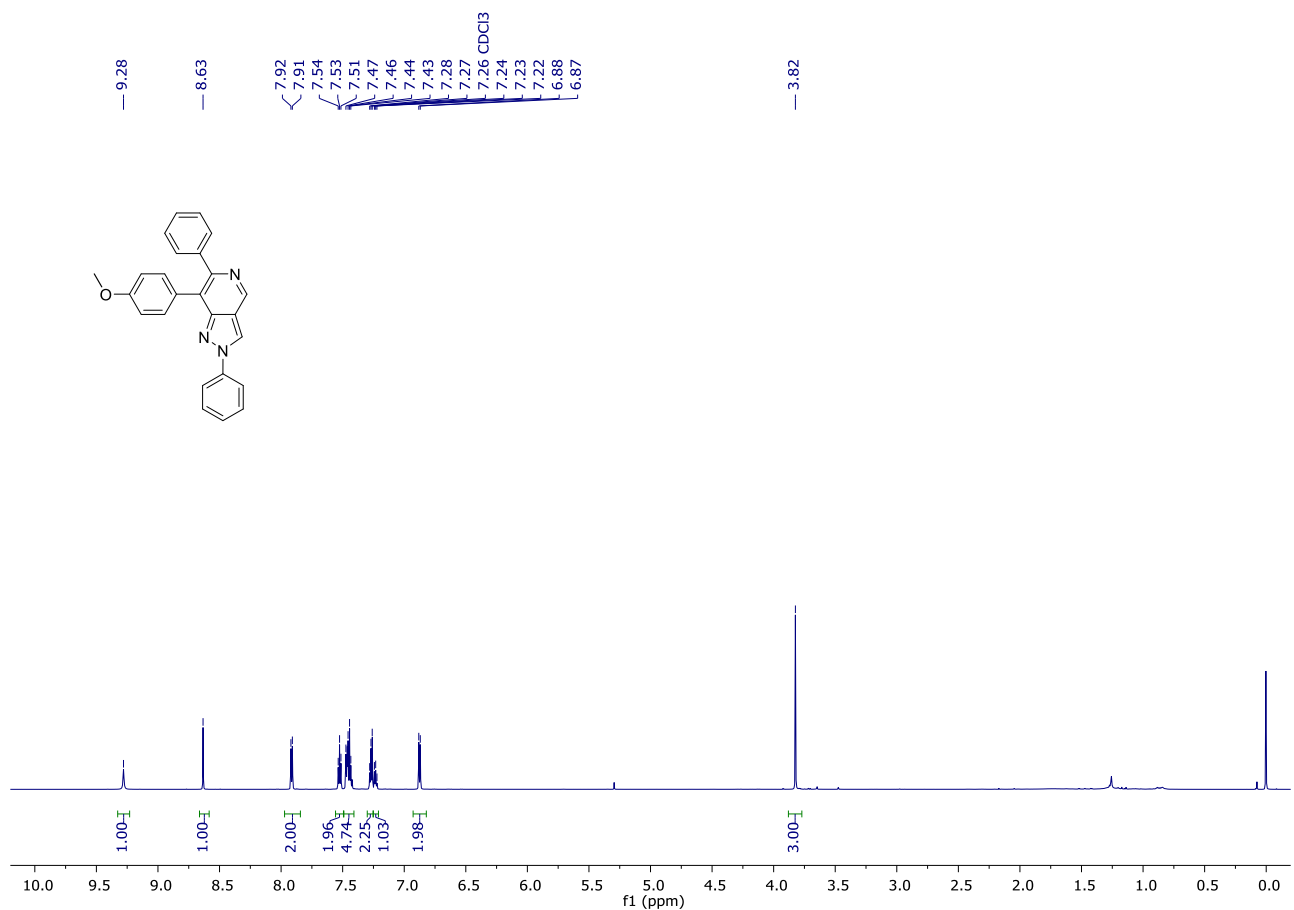

**Figure S60.** 7-(4-Methoxyphenyl)-2,6-diphenyl-2H-pyrazolo[4,3-c]pyridine (**21**). <sup>1</sup>H NMR spectrum (700 MHz, CDCl<sub>3</sub>).

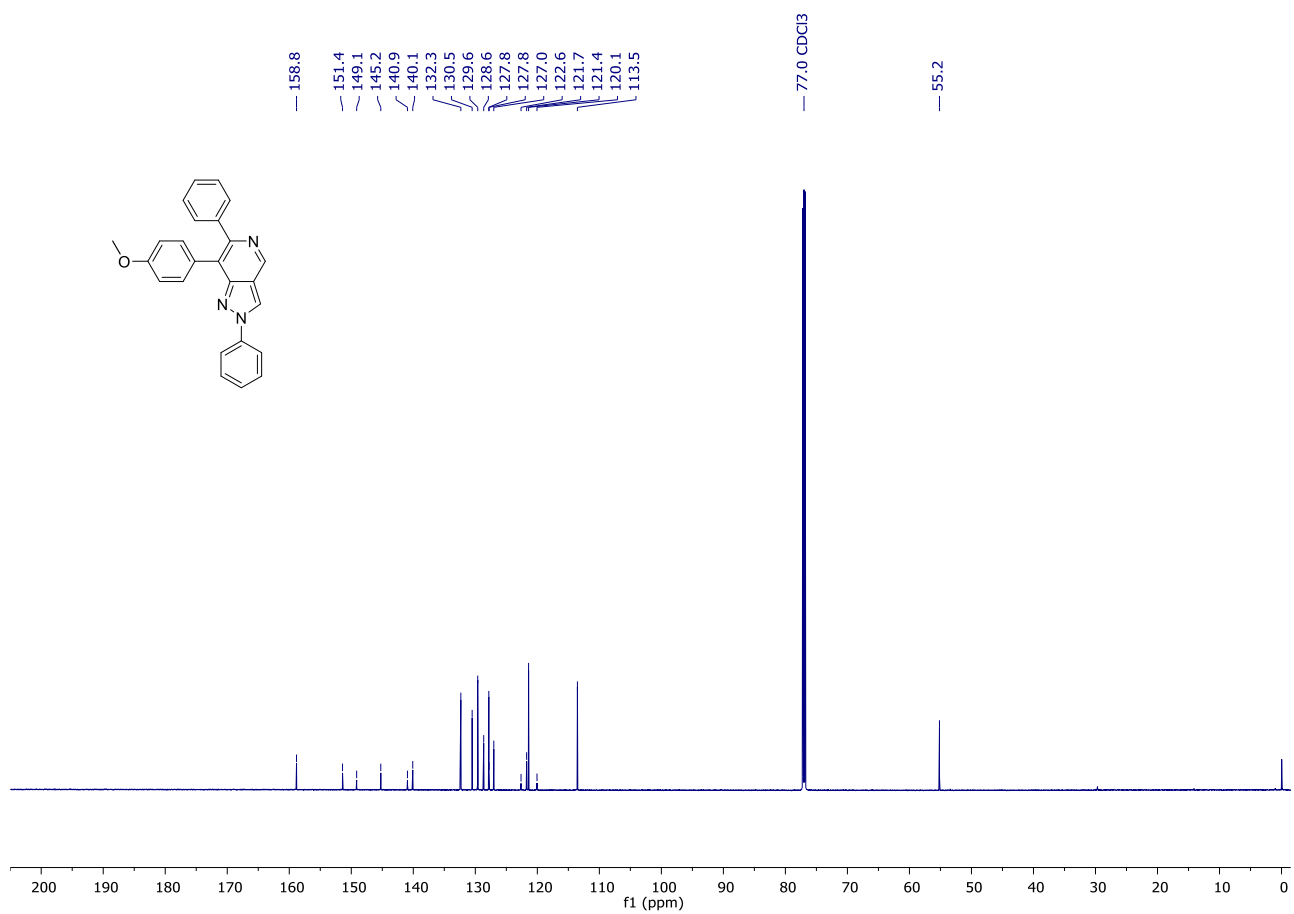

**Figure S61.** 7-(4-Methoxyphenyl)-2,6-diphenyl-2H-pyrazolo[4,3-c]pyridine (**21**). <sup>13</sup>C NMR (176 MHz, CDCl<sub>3</sub>).

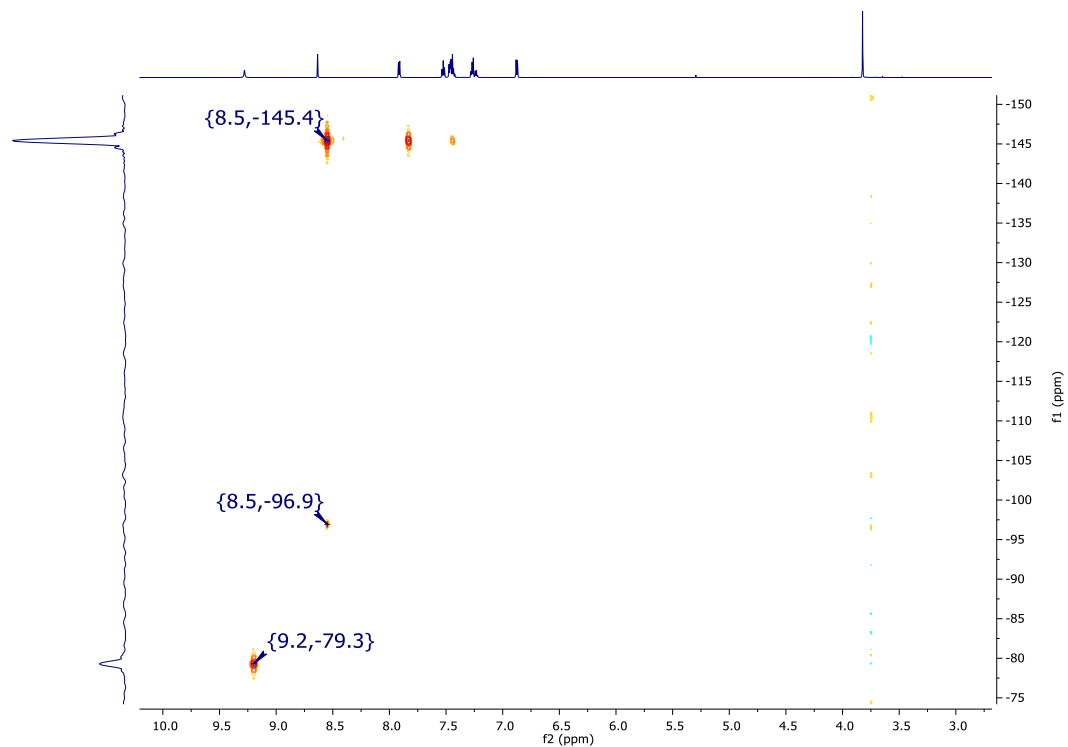

**Figure S62.** 7-(4-Methoxyphenyl)-2,6-diphenyl-2*H*-pyrazolo[4,3-*c*]pyridine (**21**).  $^1\text{H}$ - $^{15}\text{N}$  HMBC spectrum (700 MHz,  $\text{CDCl}_3$ ).

**+MS, 9.7min #583**

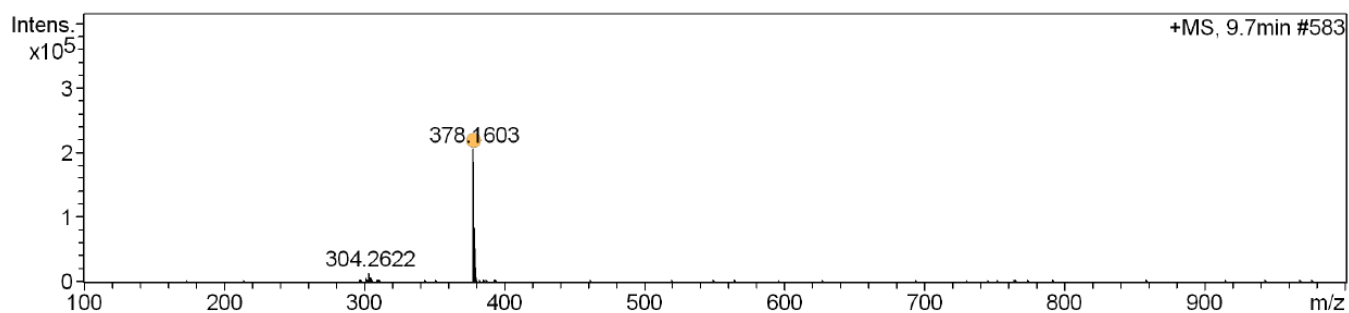

| Meas. $m/z$ | # | Ion Formula                                    | $m/z$    | err [ppm] | mSigma | # Sigma | Score  | rdb  | $e^-$ Conf | N-Rule |
|-------------|---|------------------------------------------------|----------|-----------|--------|---------|--------|------|------------|--------|
| 378.1603    | 1 | $\text{C}_{25}\text{H}_{20}\text{N}_3\text{O}$ | 378.1601 | -0.6      | 1.3    | 1       | 100.00 | 17.5 | even       | ok     |

**Figure S63.** 7-(4-Methoxyphenyl)-2,6-diphenyl-2*H*-pyrazolo[4,3-*c*]pyridine (**21**). HRMS (ESI-TOF).



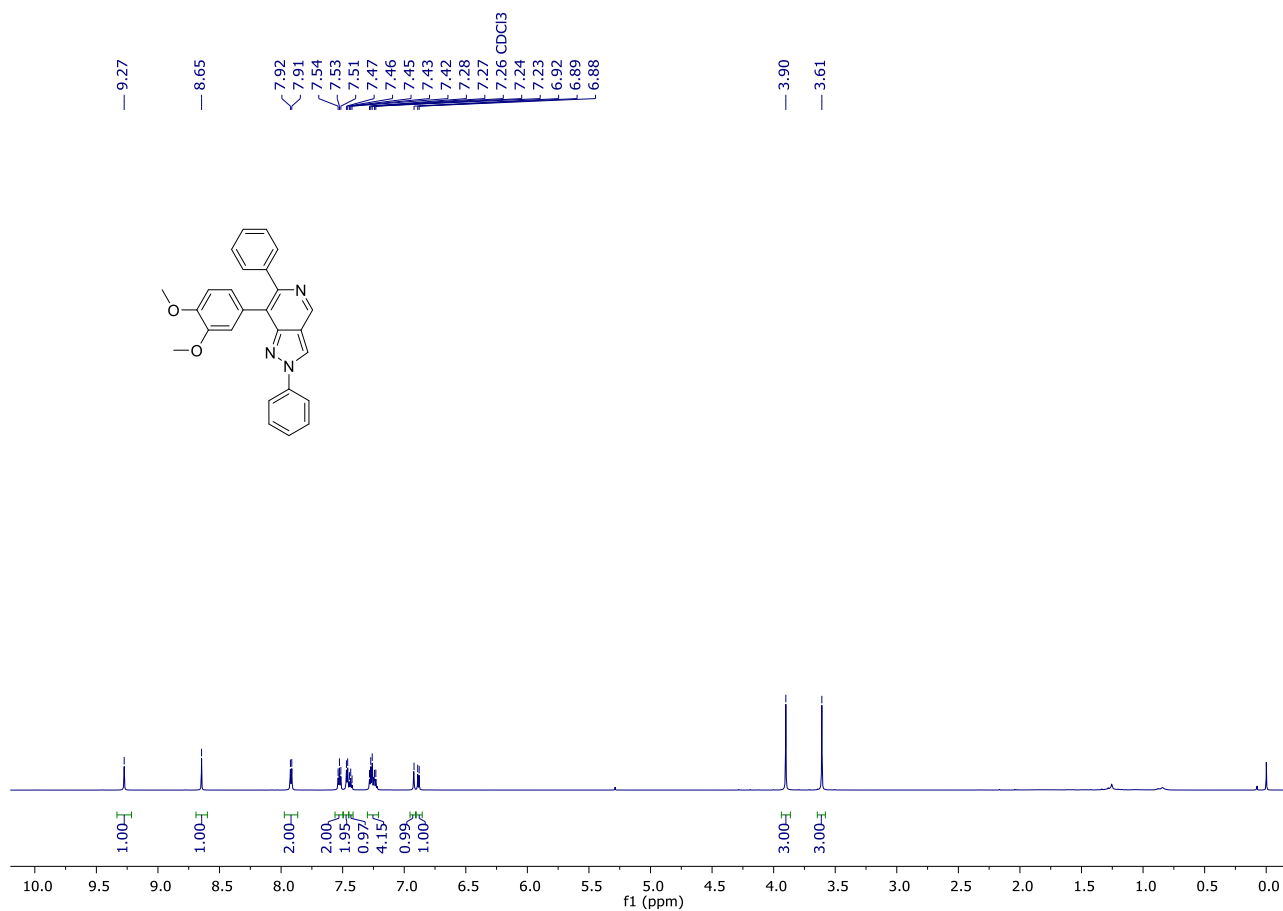

**Figure S64.** 7-(3,4-Dimethoxyphenyl)-2,6-diphenyl-2H-pyrazolo[4,3-c]pyridine (**22**). <sup>1</sup>H NMR spectrum (700 MHz, CDCl<sub>3</sub>).

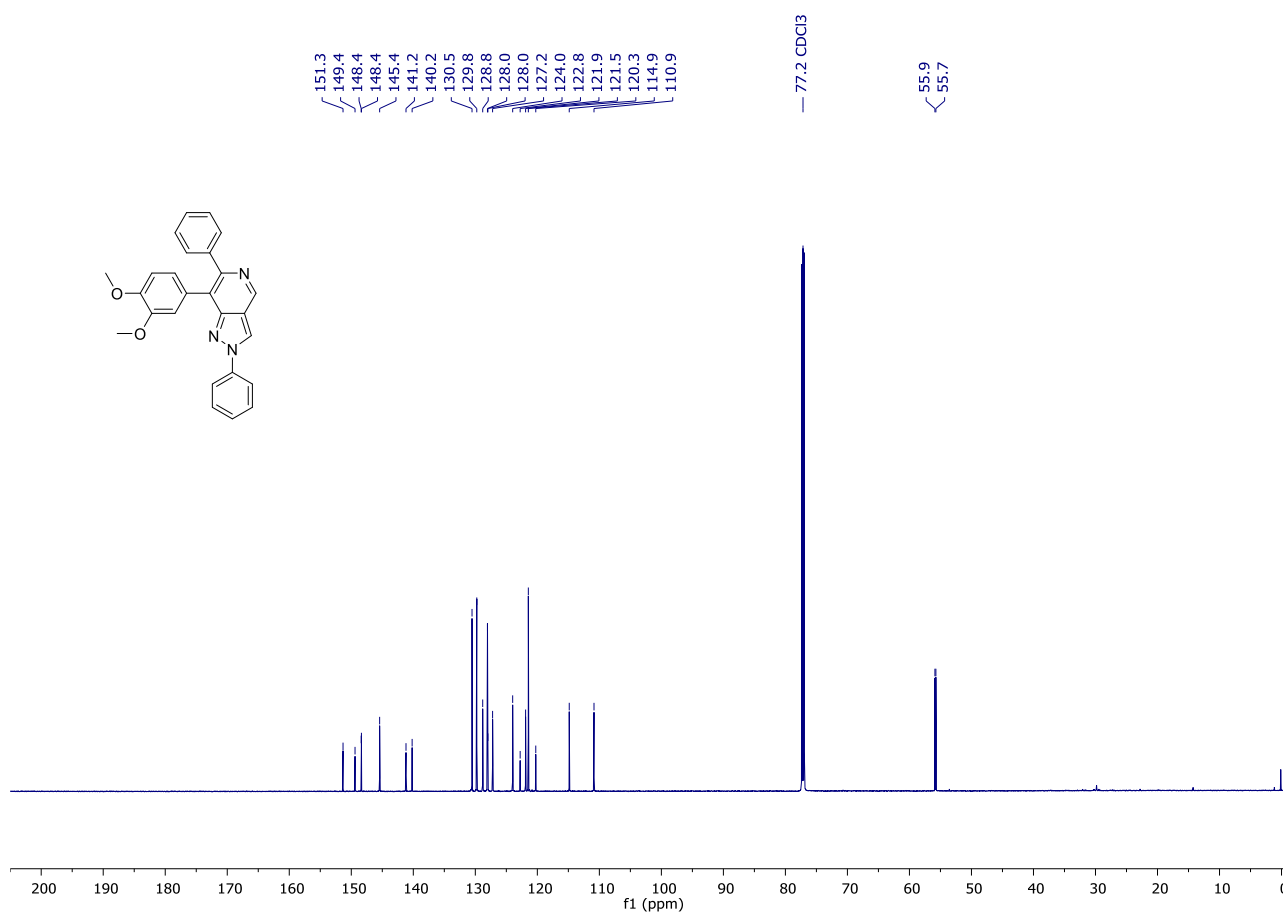

**Figure S65.** 7-(3,4-Dimethoxyphenyl)-2,6-diphenyl-2H-pyrazolo[4,3-c]pyridine (**22**). <sup>13</sup>C NMR (176 MHz, CDCl<sub>3</sub>).

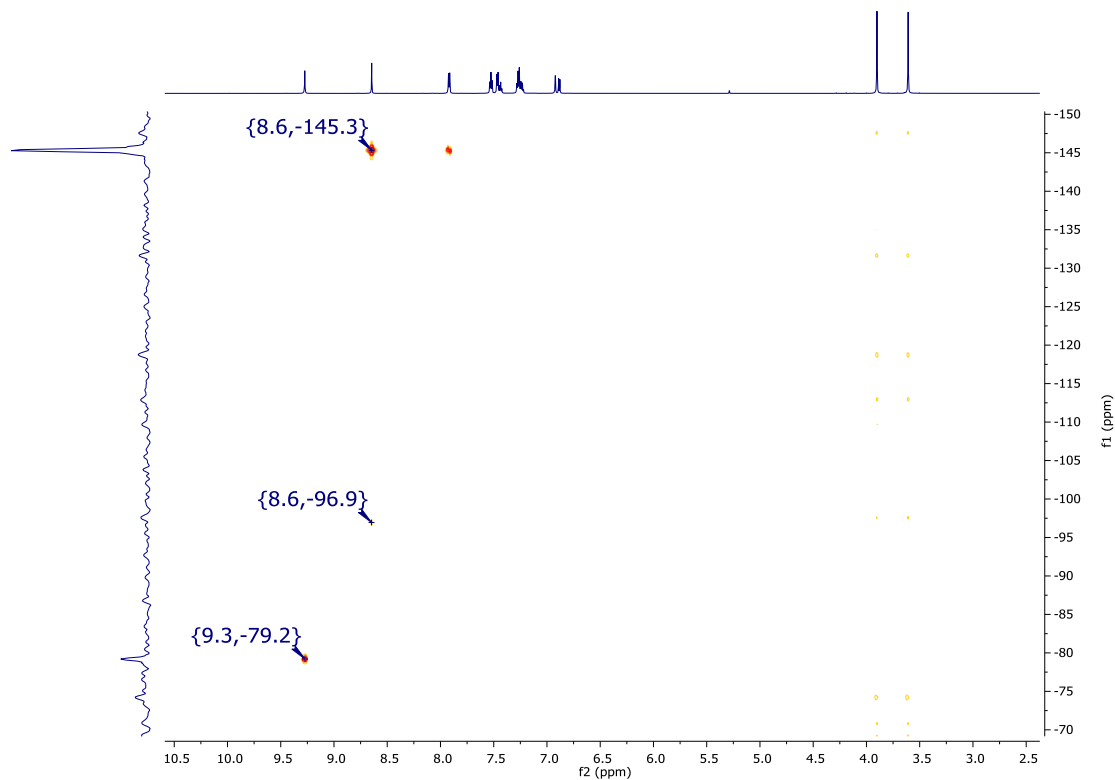

**Figure S66.** 7-(3,4-Dimethoxyphenyl)-2,6-diphenyl-2*H*-pyrazolo[4,3-*c*]pyridine (**22**).  $^1\text{H}$ - $^{15}\text{N}$  HMBC spectrum (700 MHz,  $\text{CDCl}_3$ ).

**+MS, 3.1min #185**

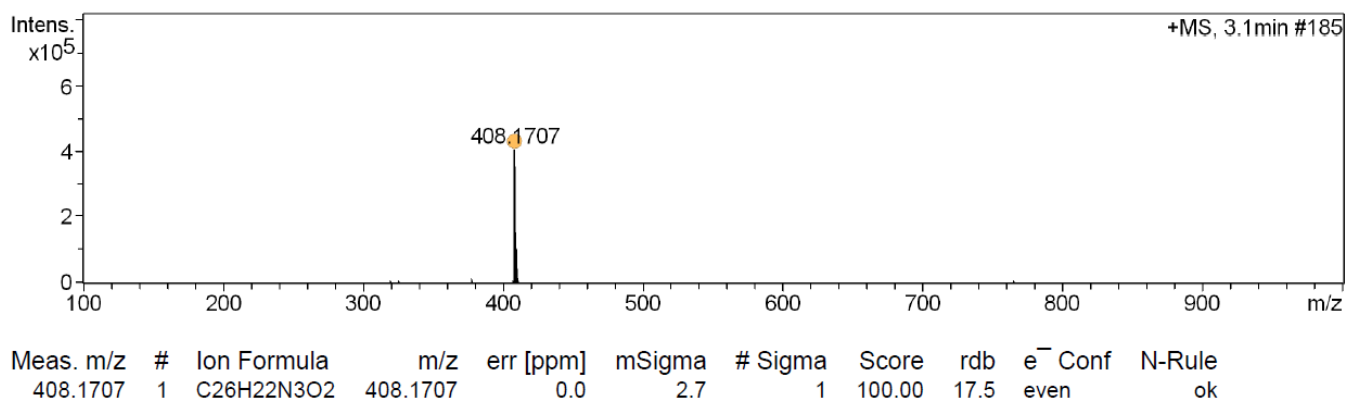

**Figure S67.** 7-(3,4-Dimethoxyphenyl)-2,6-diphenyl-2*H*-pyrazolo[4,3-*c*]pyridine (**22**). HRMS (ESI-TOF).

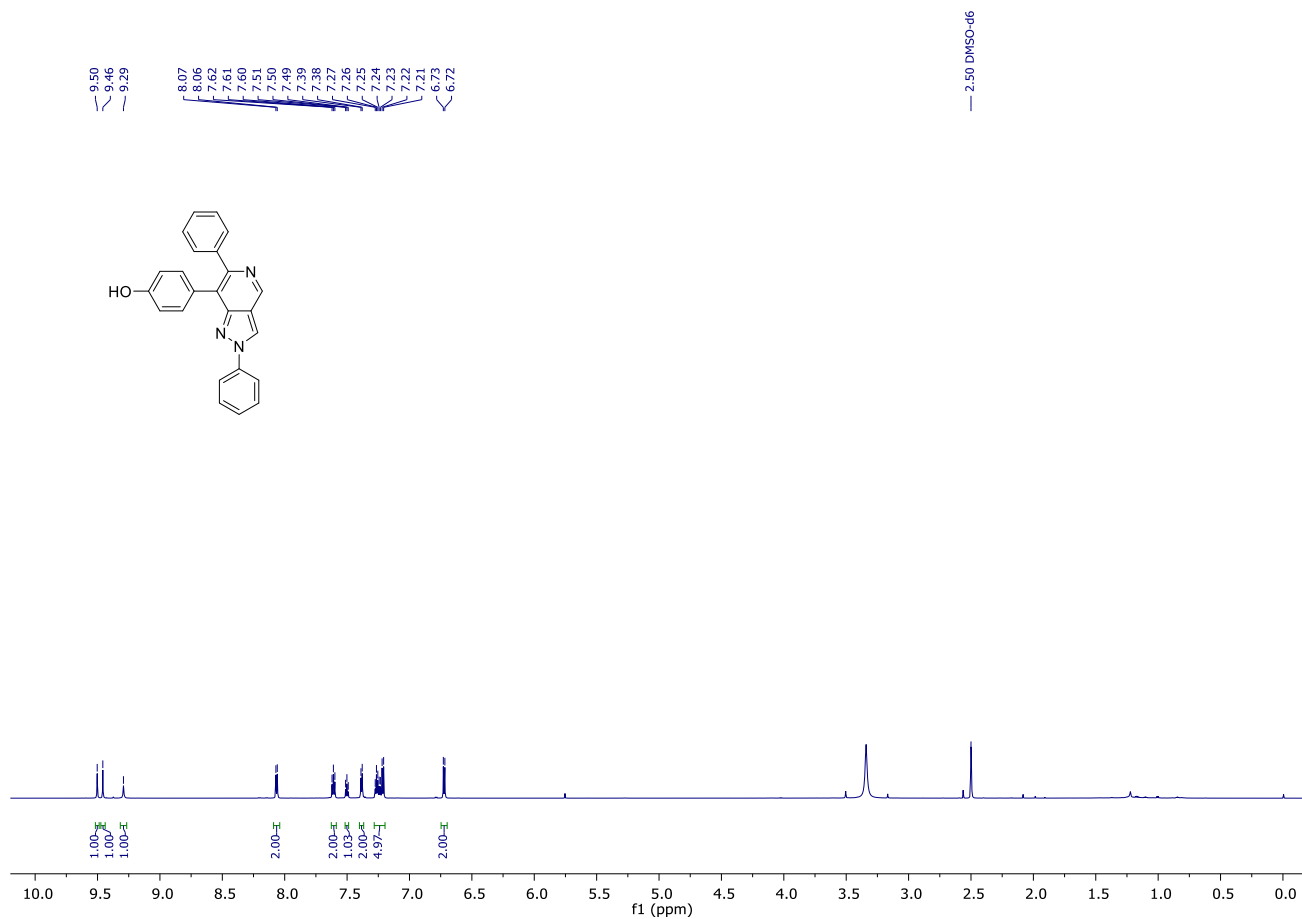

**Figure S68.** 4-(2,6-Diphenyl-2H-pyrazolo[4,3-*c*]pyridin-7-yl)phenol (**23**). <sup>1</sup>H NMR spectrum (700 MHz, DMSO-*d*<sub>6</sub>).

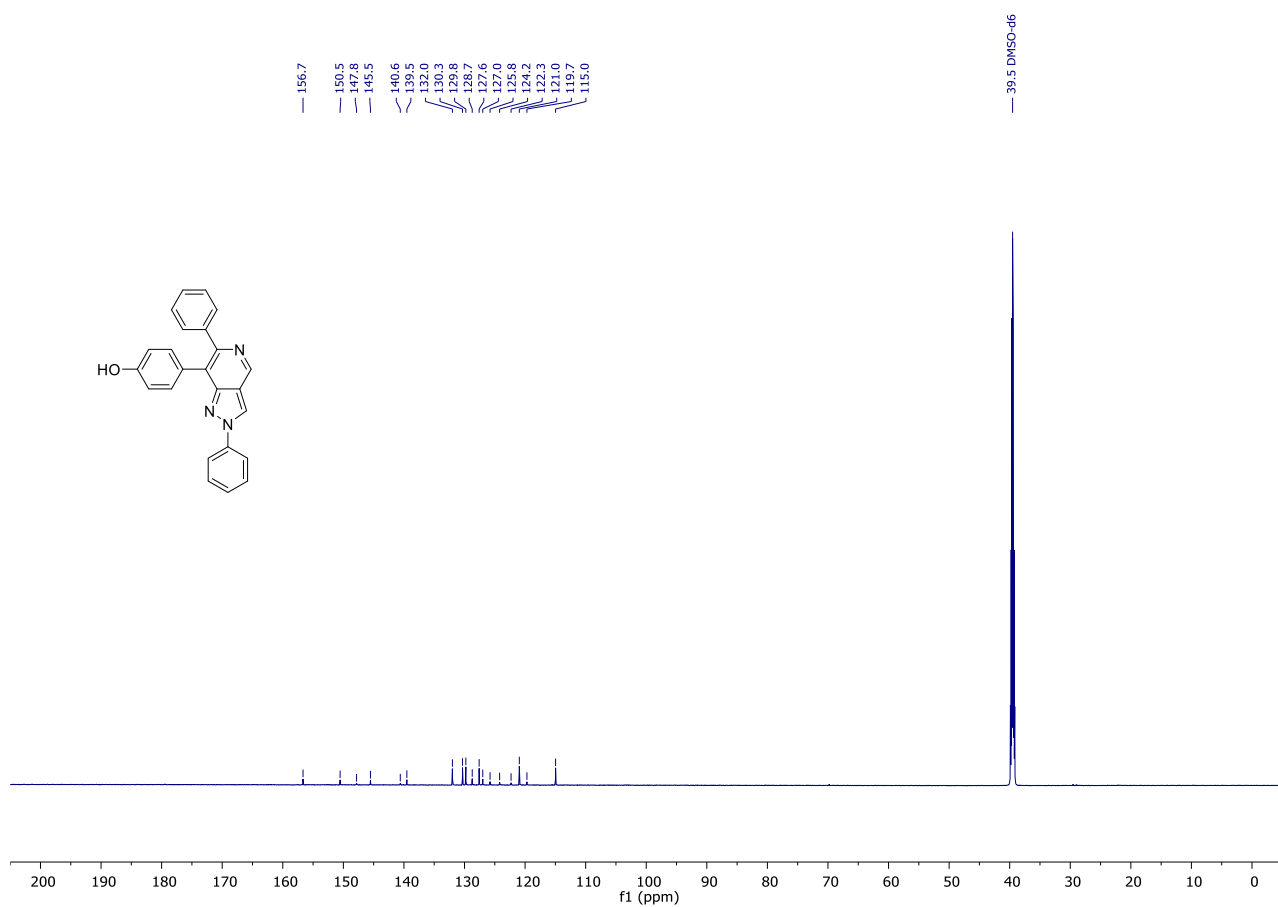

**Figure S69.** 4-(2,6-Diphenyl-2H-pyrazolo[4,3-*c*]pyridin-7-yl)phenol (**23**). <sup>13</sup>C NMR (176 MHz, DMSO-*d*<sub>6</sub>).

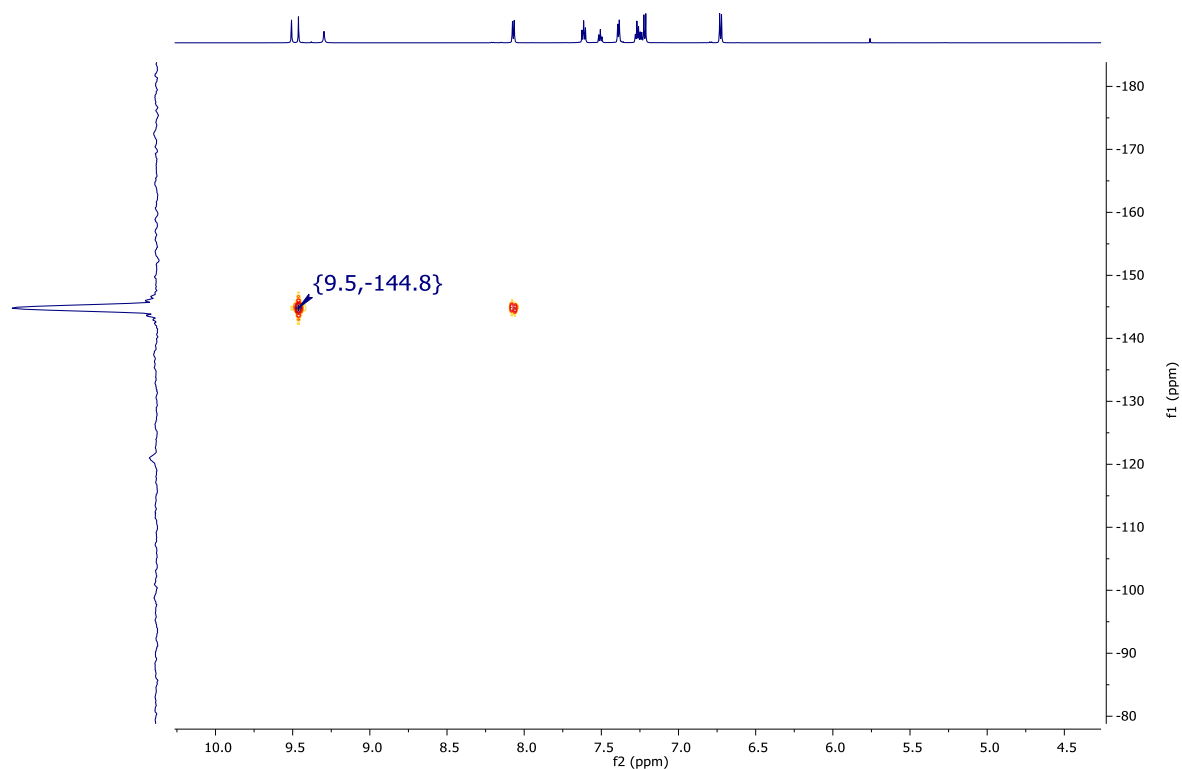

**Figure S70.** 4-(2,6-Diphenyl-2*H*-pyrazolo[4,3-*c*]pyridin-7-yl)phenol (**23**).  $^1\text{H}$ - $^{15}\text{N}$  HMBC spectrum (700 MHz,  $\text{DMSO-}d_6$ ).

**+MS, 27.9min #1674**

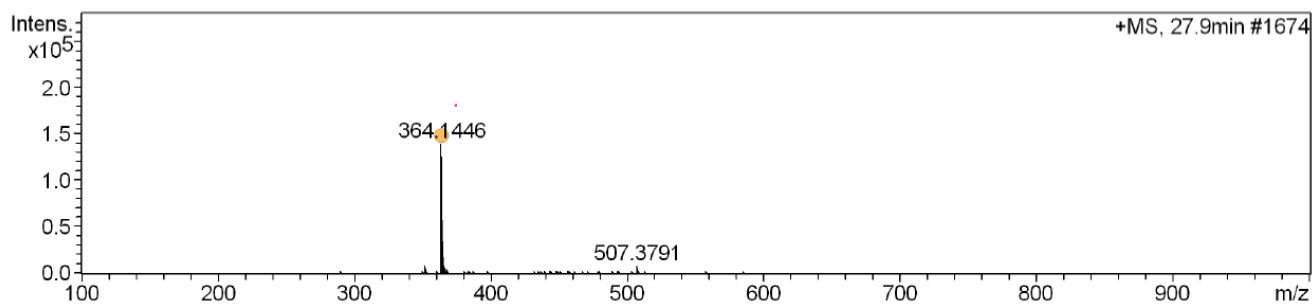

| Meas. $m/z$ | # | Ion Formula                                      | $m/z$    | err [ppm] | mSigma | # Sigma | Score  | rdb  | $e^-$ | Conf | N-Rule |
|-------------|---|--------------------------------------------------|----------|-----------|--------|---------|--------|------|-------|------|--------|
| 364.1446    | 1 | C <sub>24</sub> H <sub>18</sub> N <sub>3</sub> O | 364.1444 | 0.4       | 3.3    | 1       | 100.00 | 17.5 | even  |      | ok     |

**Figure S71.** 4-(2,6-Diphenyl-2*H*-pyrazolo[4,3-*c*]pyridin-7-yl)phenol (**23**). HRMS (ESI-TOF).

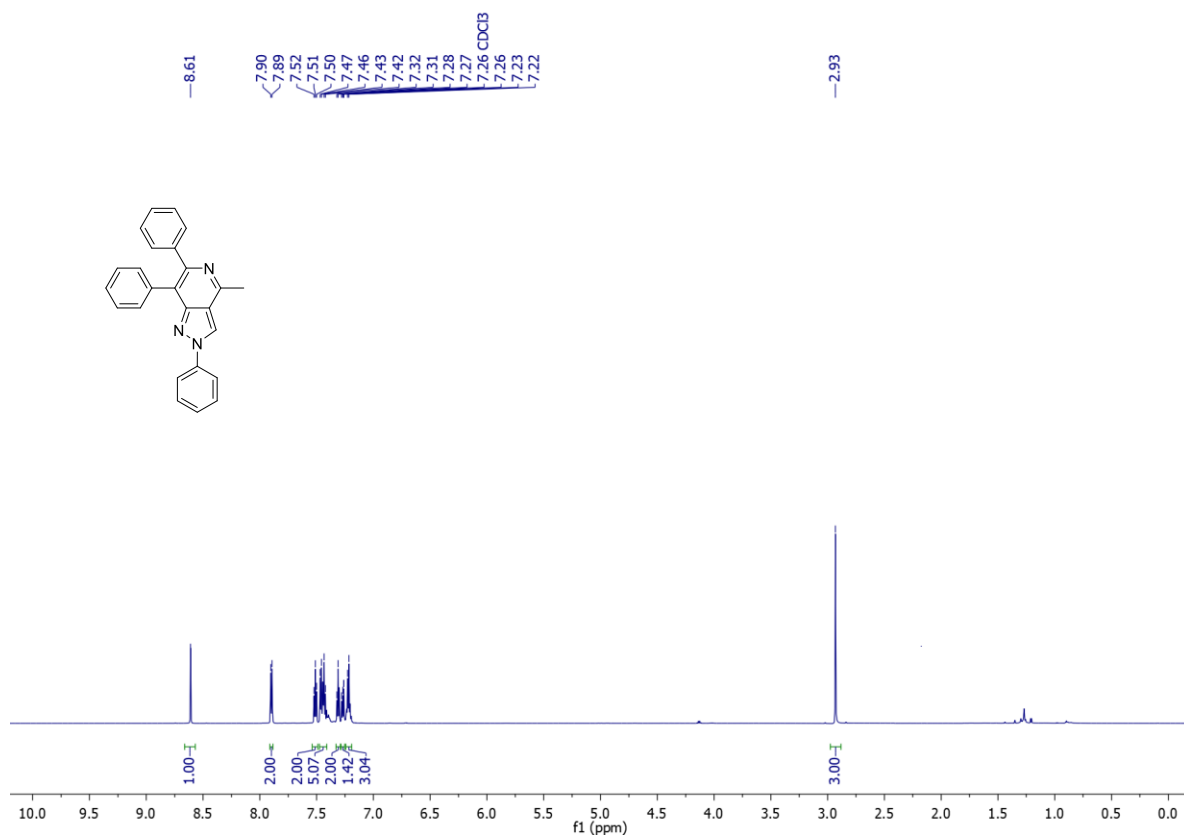

**Figure S72.** 4-Methyl-2,6,7-triphenyl-2H-pyrazolo[4,3-c]pyridine (**24**). <sup>1</sup>H NMR spectrum (700 MHz, CDCl<sub>3</sub>).

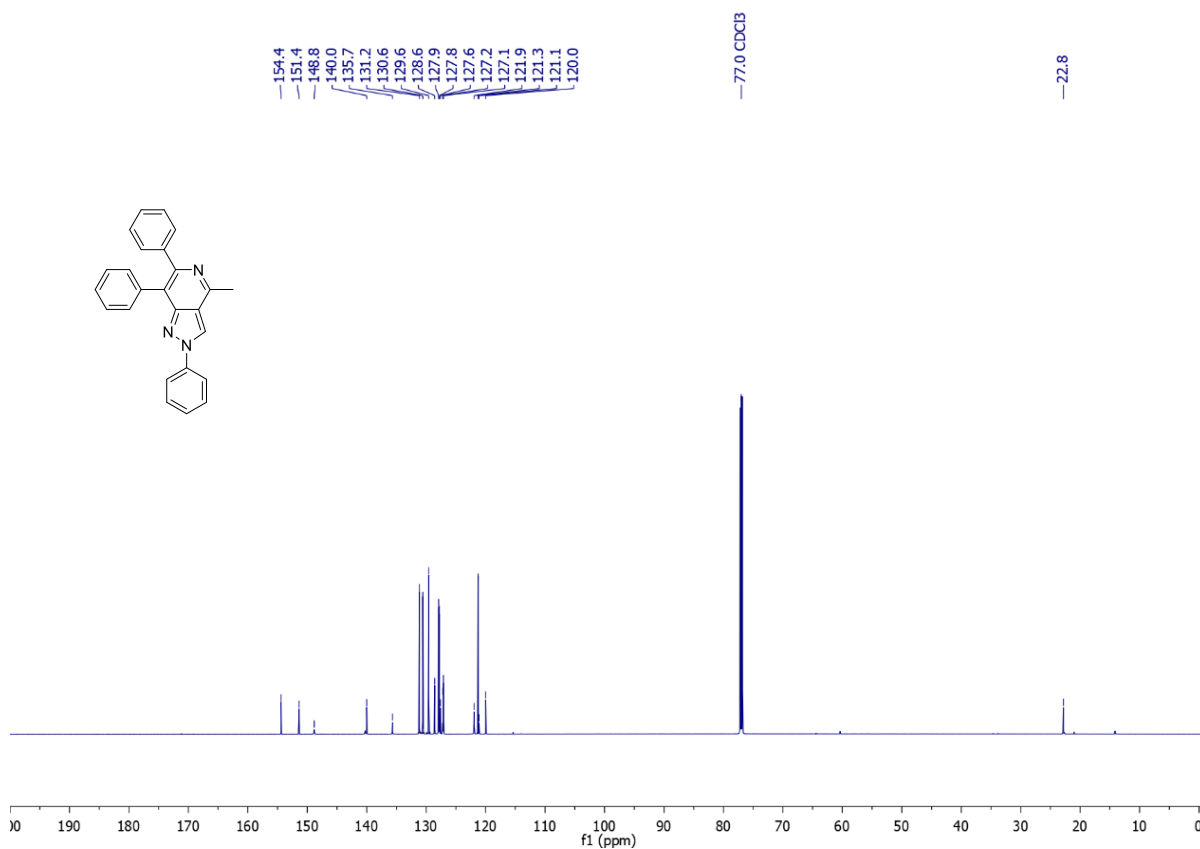

**Figure S73.** 4-Methyl-2,6,7-triphenyl-2H-pyrazolo[4,3-c]pyridine (**24**). <sup>13</sup>C NMR (176 MHz, CDCl<sub>3</sub>).

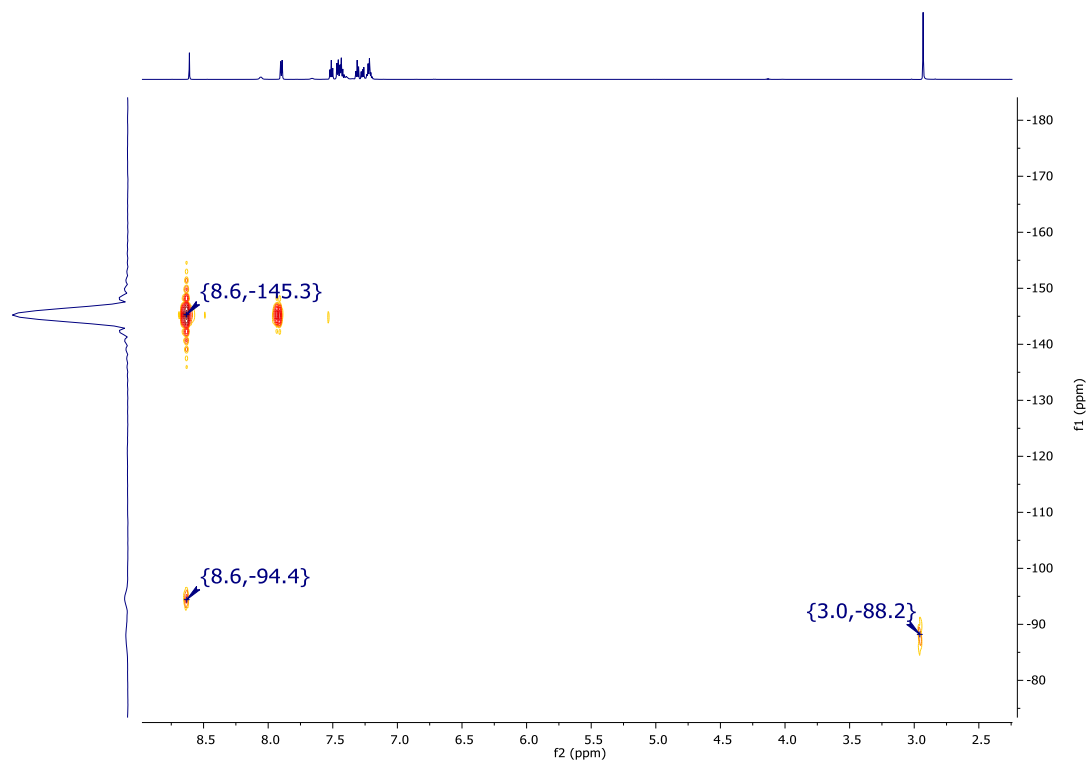

**Figure S74.** 4-Methyl-2,6,7-triphenyl-2*H*-pyrazolo[4,3-*c*]pyridine (**24**).  $^1\text{H}$ - $^{15}\text{N}$  HMBC spectrum (700 MHz,  $\text{CDCl}_3$ ).

**+MS, 16.7min #999**

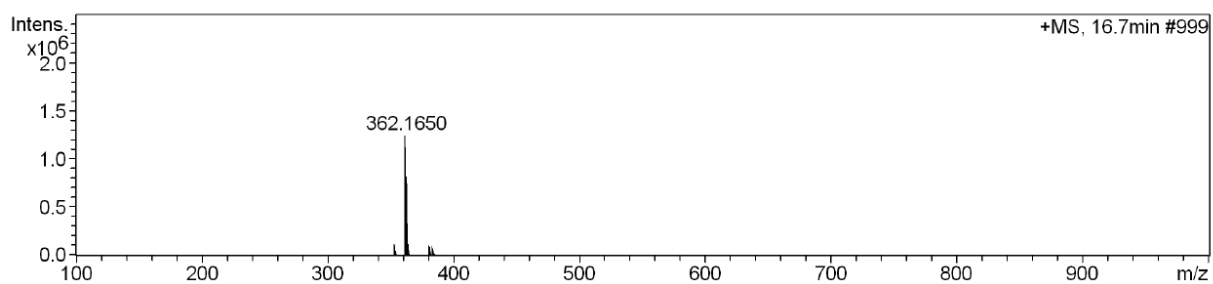

| Meas. $m/z$ | # | Ion Formula                            | $m/z$    | err [ppm] | mSigma | # Sigma | Score  | rdb  | $e^-$ Conf | N-Rule |
|-------------|---|----------------------------------------|----------|-----------|--------|---------|--------|------|------------|--------|
| 362.1650    | 1 | $\text{C}_{25}\text{H}_{20}\text{N}_3$ | 362.1652 | 0.6       | 218.5  | 1       | 100.00 | 17.5 | even       | ok     |

**Figure S75.** 4-Methyl-2,6,7-triphenyl-2*H*-pyrazolo[4,3-*c*]pyridine (**24**). HRMS (ESI-TOF).

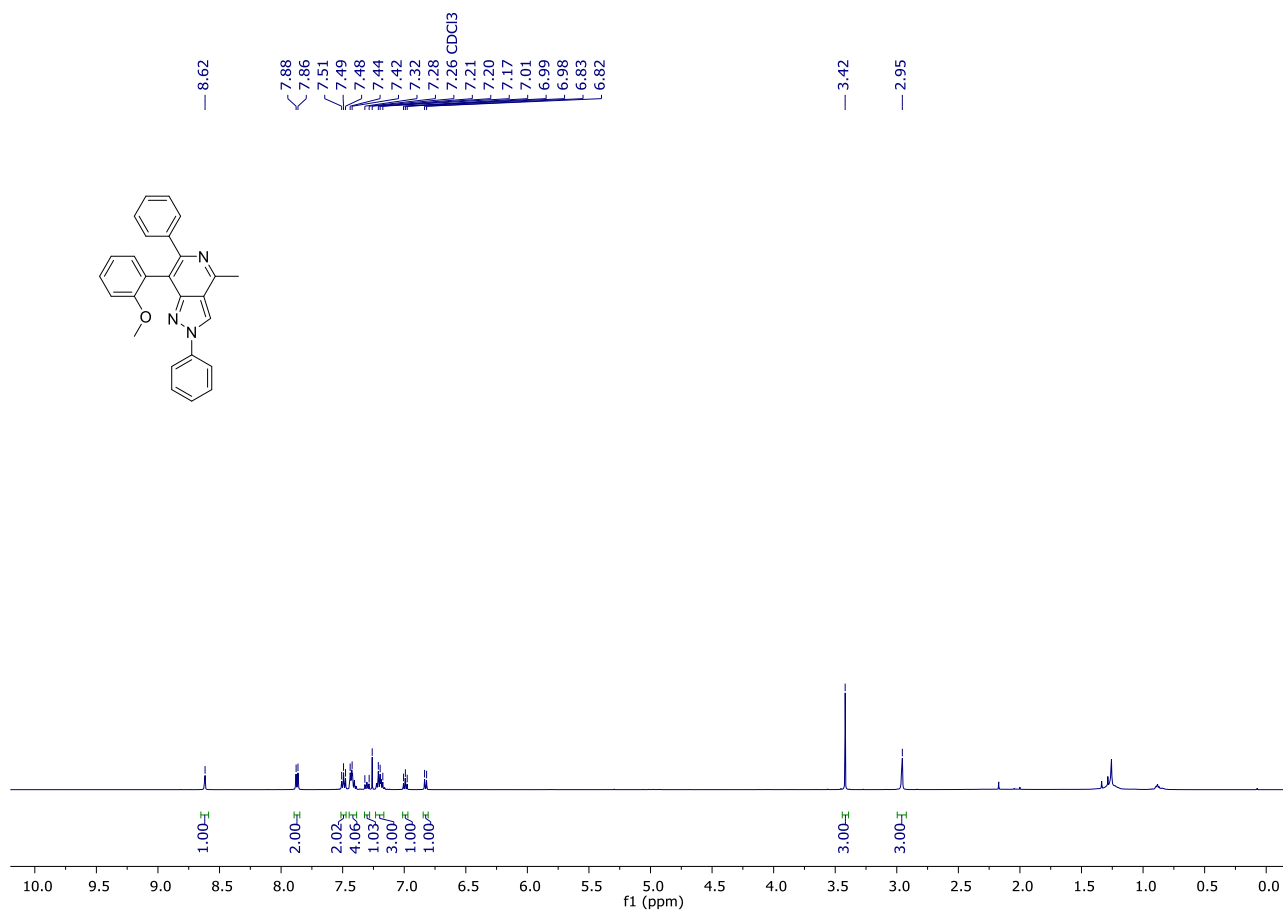

**Figure S76.** 7-(2-Methoxyphenyl)-4-methyl-2,6-diphenyl-2H-pyrazolo[4,3-c]pyridine (**25**). <sup>1</sup>H NMR spectrum (500 MHz, CDCl<sub>3</sub>).

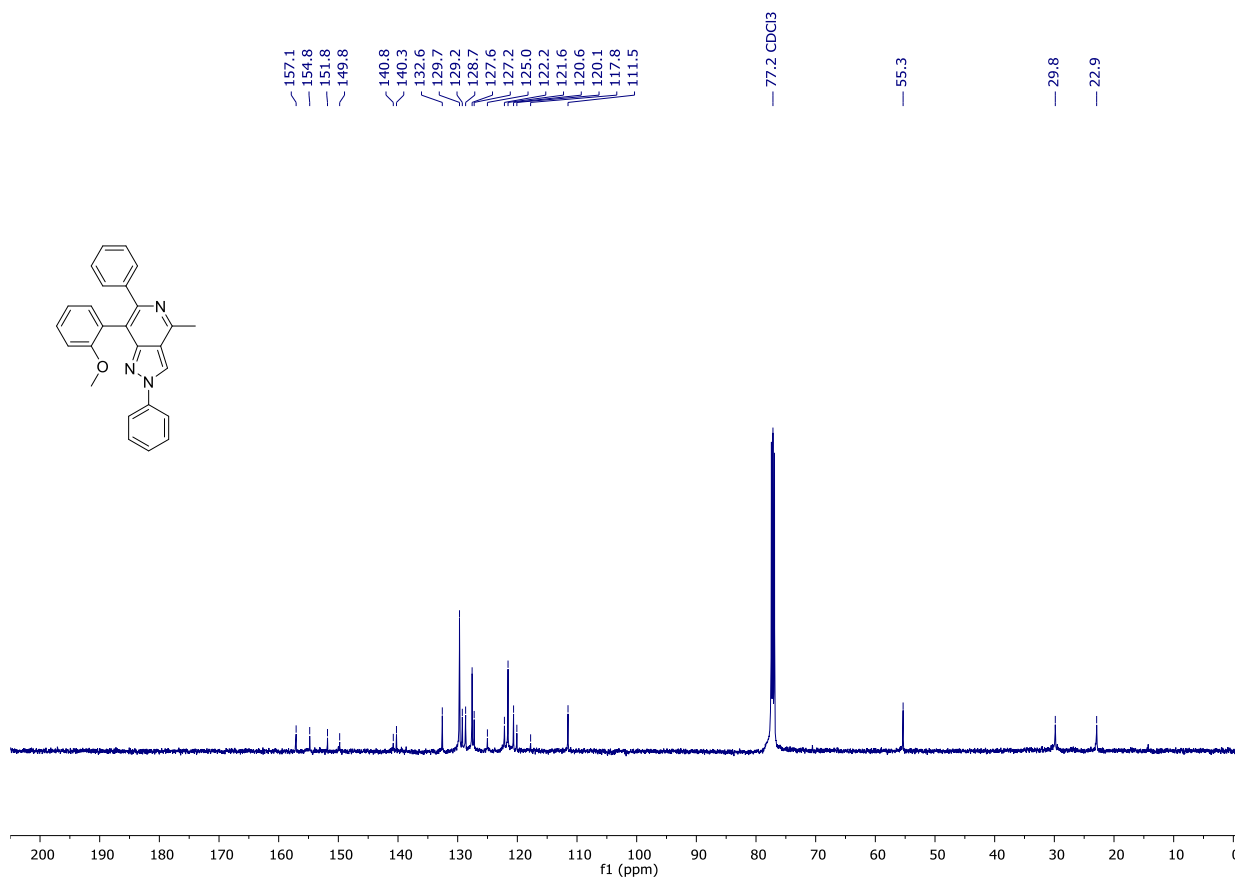

**Figure S77.** 7-(2-Methoxyphenyl)-4-methyl-2,6-diphenyl-2H-pyrazolo[4,3-c]pyridine (**25**). <sup>13</sup>C NMR (126 MHz, CDCl<sub>3</sub>).

**+MS, 4.5min #267**

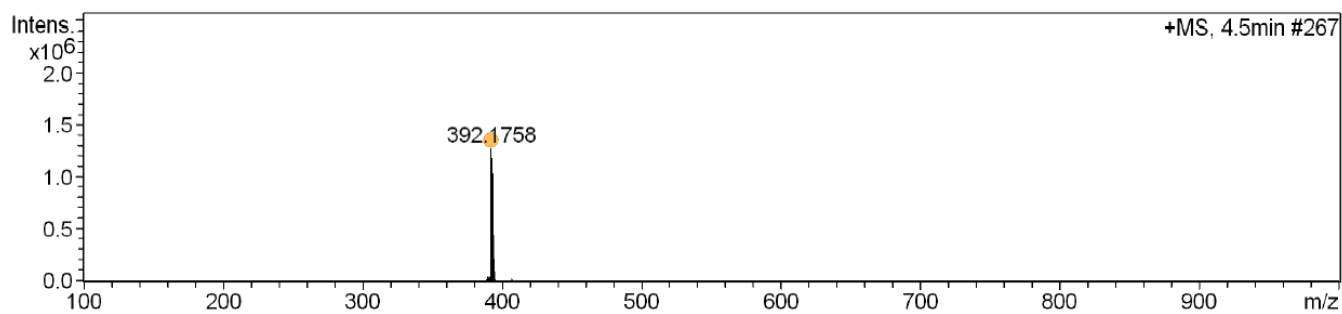

| Meas. $m/z$ | # | Ion Formula                                      | $m/z$    | err [ppm] | mSigma | # Sigma | Score  | rdb  | $e^-$ | Conf | N-Rule |
|-------------|---|--------------------------------------------------|----------|-----------|--------|---------|--------|------|-------|------|--------|
| 392.1758    | 1 | C <sub>26</sub> H <sub>22</sub> N <sub>3</sub> O | 392.1757 | 0.2       | 325.3  | 1       | 100.00 | 17.5 | even  |      | ok     |

**Figure S78.** 7-(2-Methoxyphenyl)-4-methyl-2,6-diphenyl-2*H*-pyrazolo[4,3-*c*]pyridine (**25**). HRMS (ESI-TOF).



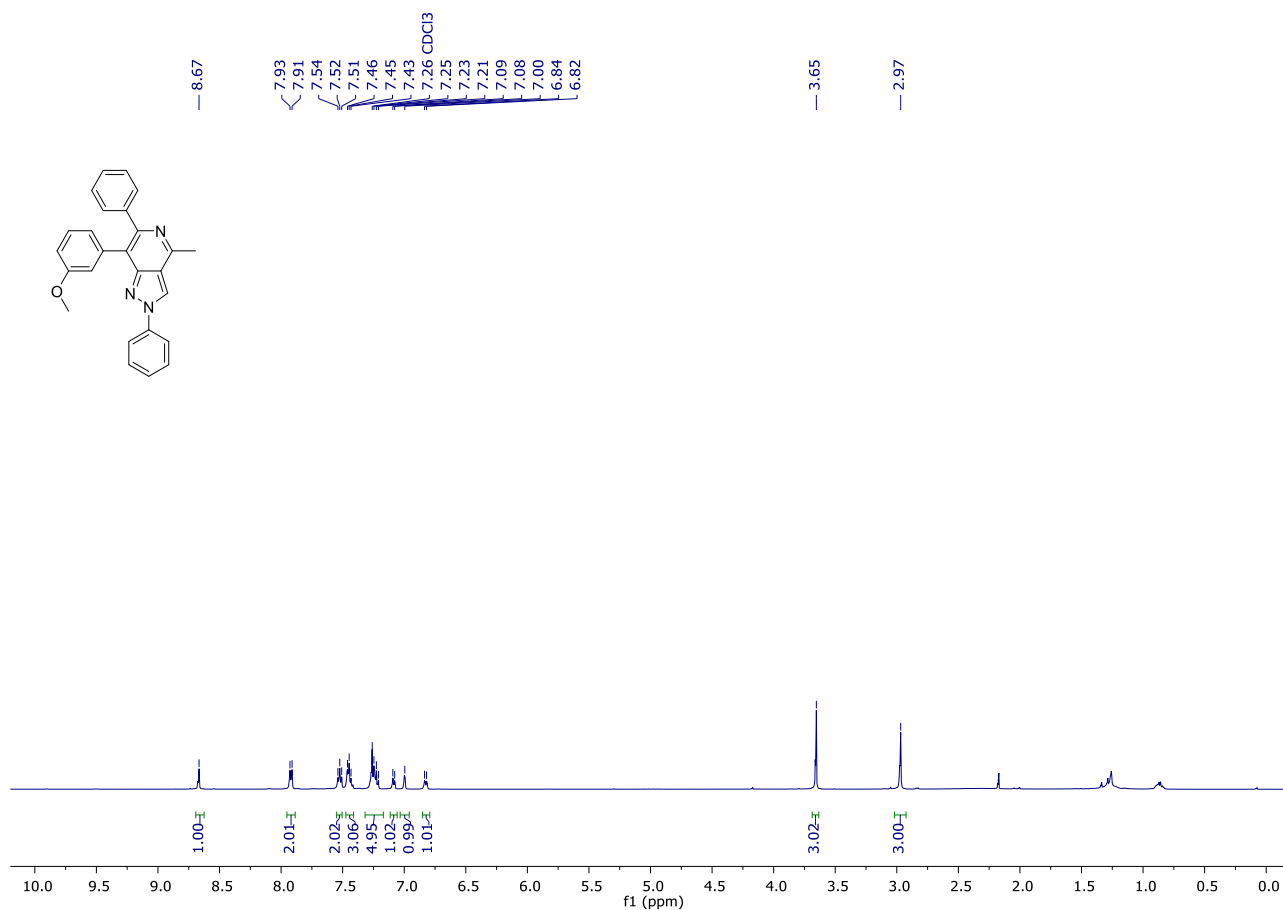

**Figure S79.** 7-(3-Methoxyphenyl)-4-methyl-2,6-diphenyl-2H-pyrazolo[4,3-c]pyridine (**26**). <sup>1</sup>H NMR spectrum (500 MHz, CDCl<sub>3</sub>).

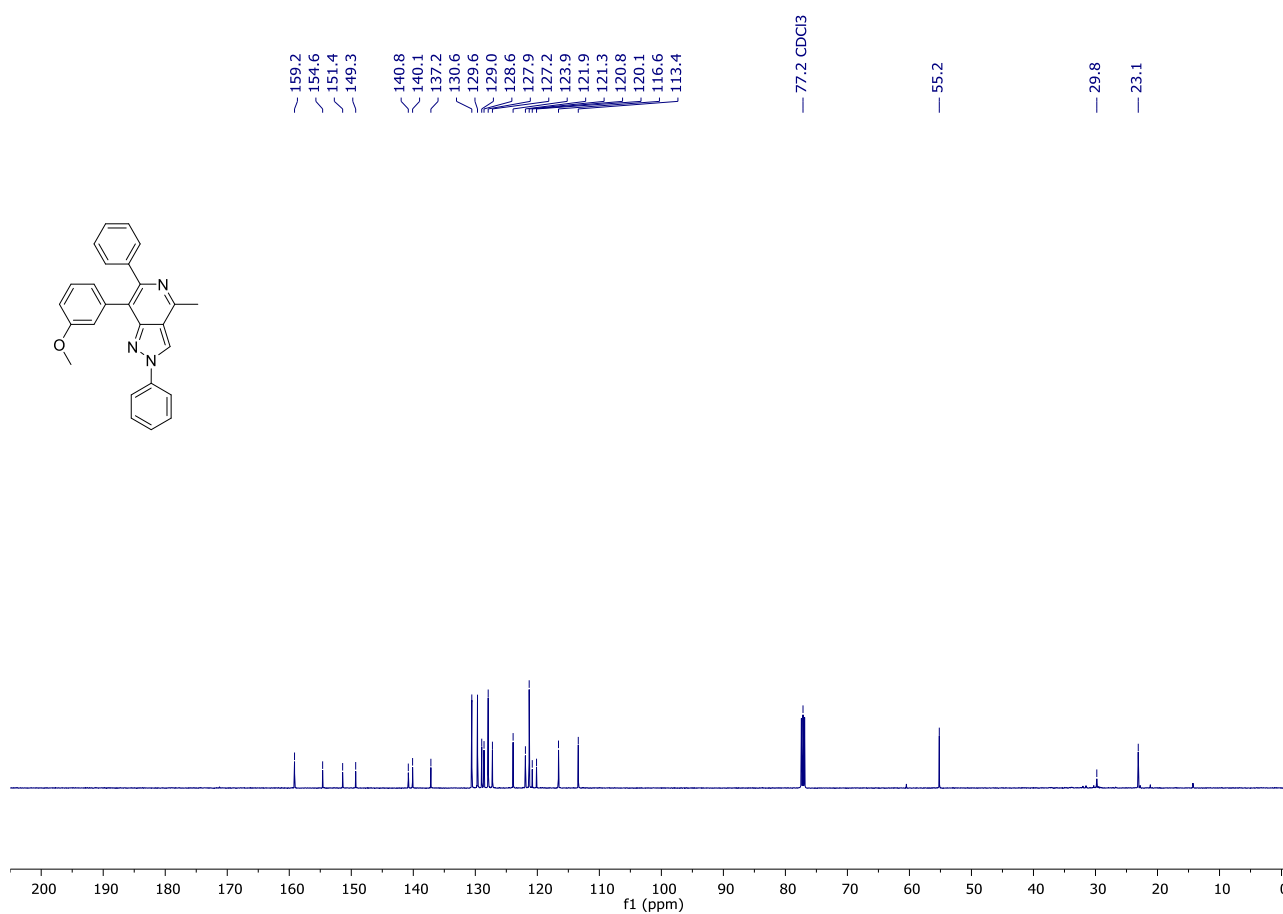

**Figure S80.** 7-(3-Methoxyphenyl)-4-methyl-2,6-diphenyl-2H-pyrazolo[4,3-c]pyridine (**26**). <sup>13</sup>C NMR (126 MHz, CDCl<sub>3</sub>).

+MS, 5.8min #348

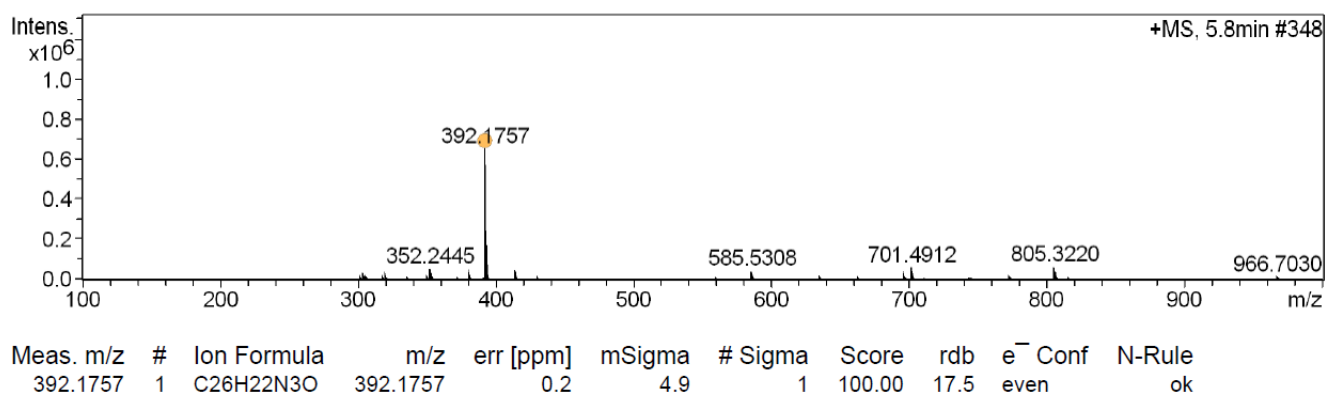

**Figure S81.** 7-(3-Methoxyphenyl)-4-methyl-2,6-diphenyl-2*H*-pyrazolo[4,3-*c*]pyridine (**26**). HRMS (ESI-TOF).

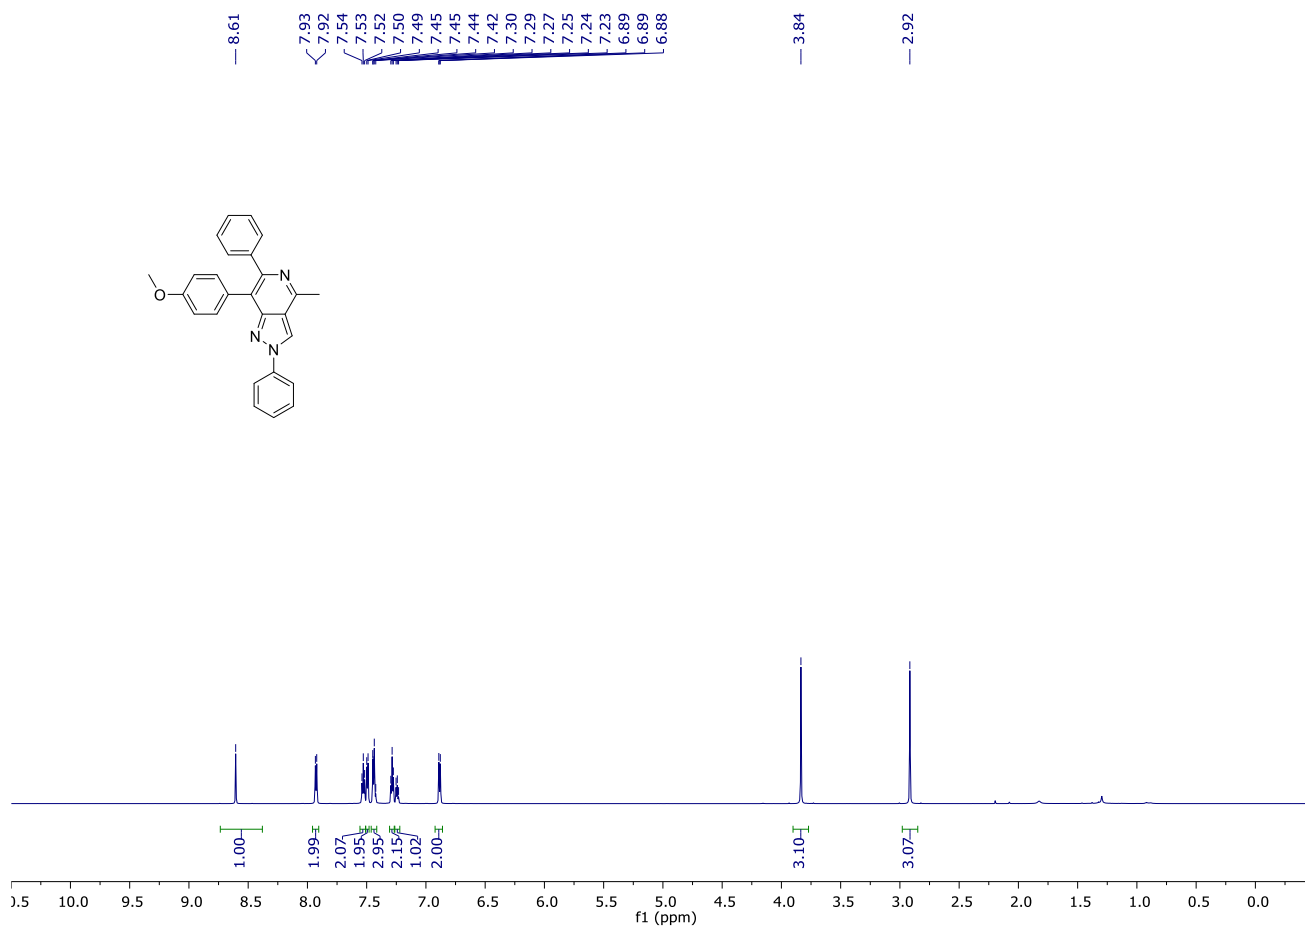

**Figure S82.** 7-(4-Methoxyphenyl)-4-methyl-2,6-diphenyl-2H-pyrazolo[4,3-c]pyridine (**27**). <sup>1</sup>H NMR spectrum (700 MHz, CDCl<sub>3</sub>).

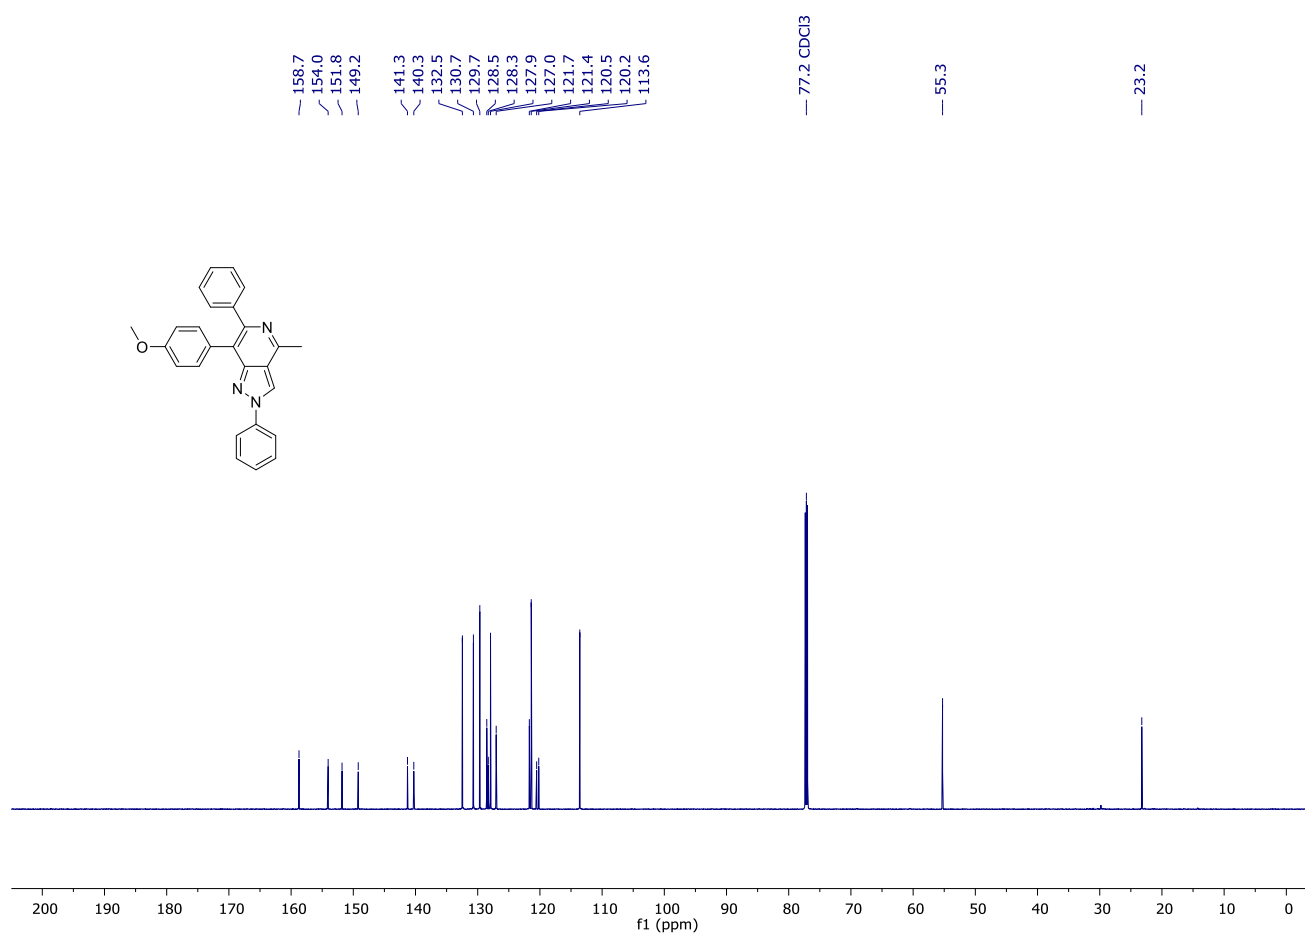

**Figure S83.** 7-(4-Methoxyphenyl)-4-methyl-2,6-diphenyl-2H-pyrazolo[4,3-c]pyridine (**27**). <sup>13</sup>C NMR (176 MHz, CDCl<sub>3</sub>).

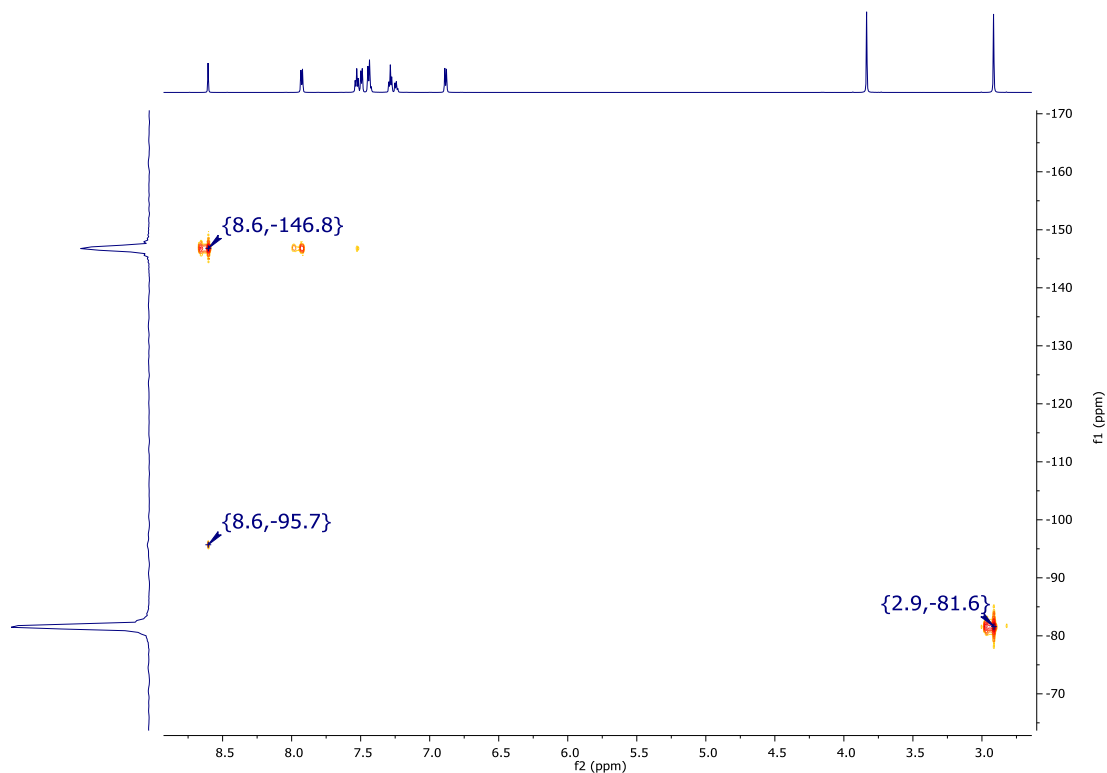

**Figure S84.** 7-(4-Methoxyphenyl)-4-methyl-2,6-diphenyl-2*H*-pyrazolo[4,3-*c*]pyridine (**27**).  $^1\text{H}$ - $^{15}\text{N}$  HMBC spectrum (700 MHz,  $\text{CDCl}_3$ ).

**+MS, 5.5min #329**

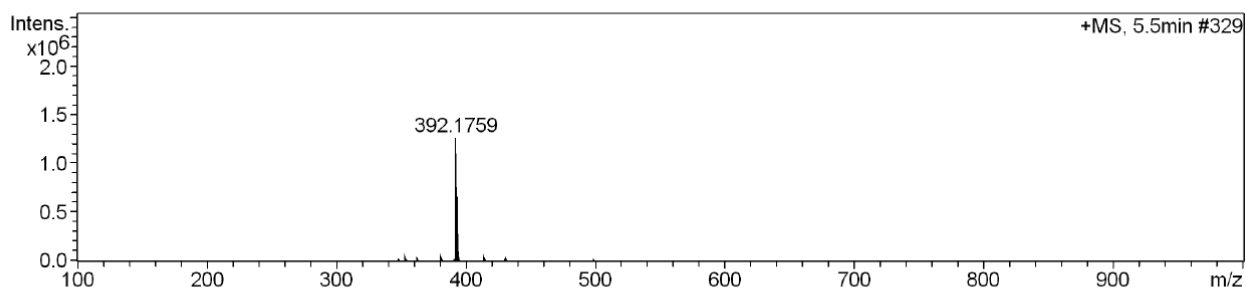

| Meas. $m/z$ | # | Ion Formula                                    | $m/z$    | err [ppm] | mSigma | # Sigma | Score  | rdb  | $e^-$ | Conf | N-Rule |
|-------------|---|------------------------------------------------|----------|-----------|--------|---------|--------|------|-------|------|--------|
| 392.1759    | 1 | $\text{C}_{26}\text{H}_{22}\text{N}_3\text{O}$ | 392.1757 | 0.4       | 155.5  | 1       | 100.00 | 17.5 | even  |      | ok     |

**Figure S85.** 7-(4-Methoxyphenyl)-4-methyl-2,6-diphenyl-2*H*-pyrazolo[4,3-*c*]pyridine (**27**). HRMS (ESI-TOF).

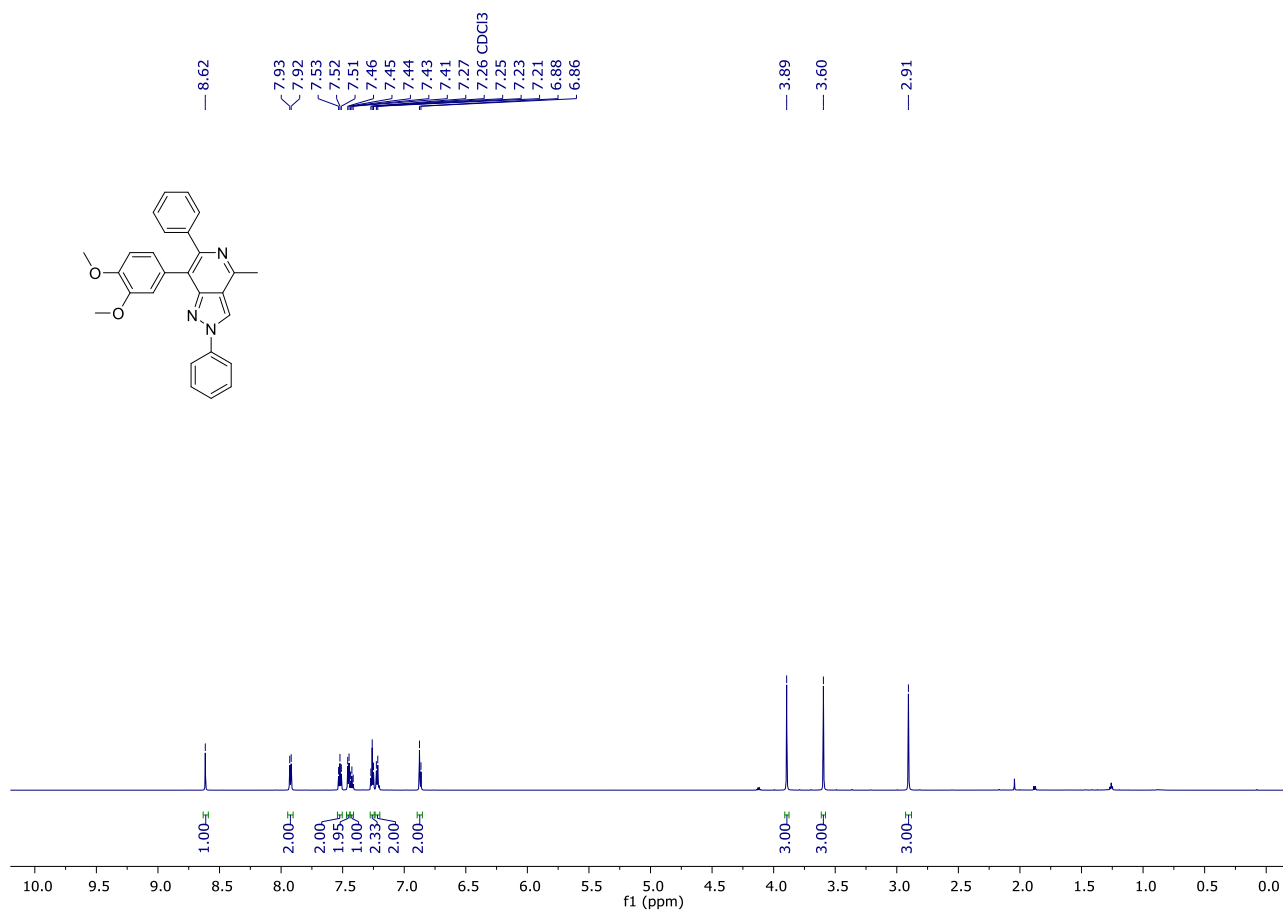

**Figure S86.** 7-(3,4-Dimethoxyphenyl)-4-methyl-2,6-diphenyl-2H-pyrazolo[4,3-c]pyridine (**28**). <sup>1</sup>H NMR spectrum (700 MHz, CDCl<sub>3</sub>).

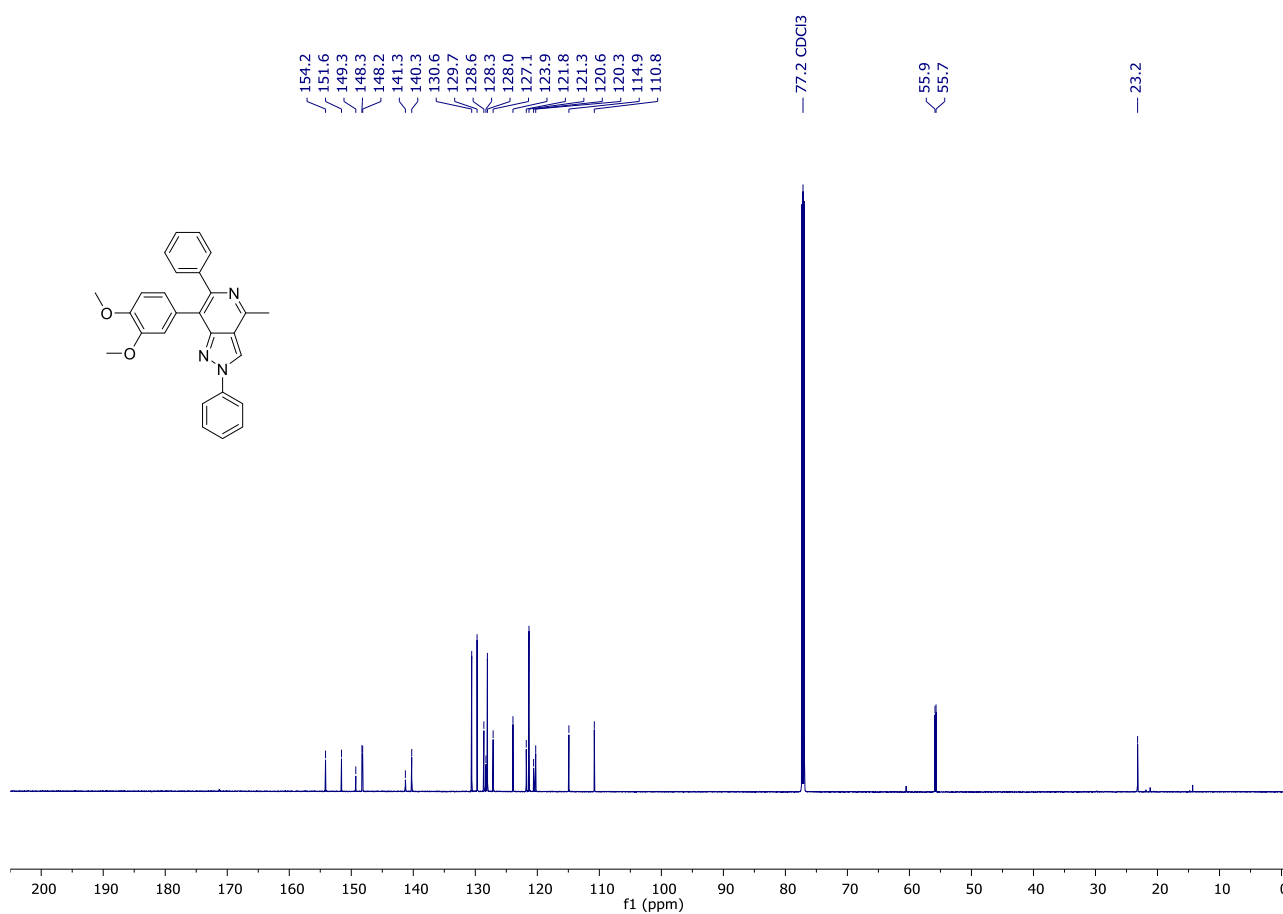

**Figure S87.** 7-(3,4-Dimethoxyphenyl)-4-methyl-2,6-diphenyl-2H-pyrazolo[4,3-c]pyridine (**28**). <sup>13</sup>C NMR (176 MHz, CDCl<sub>3</sub>).

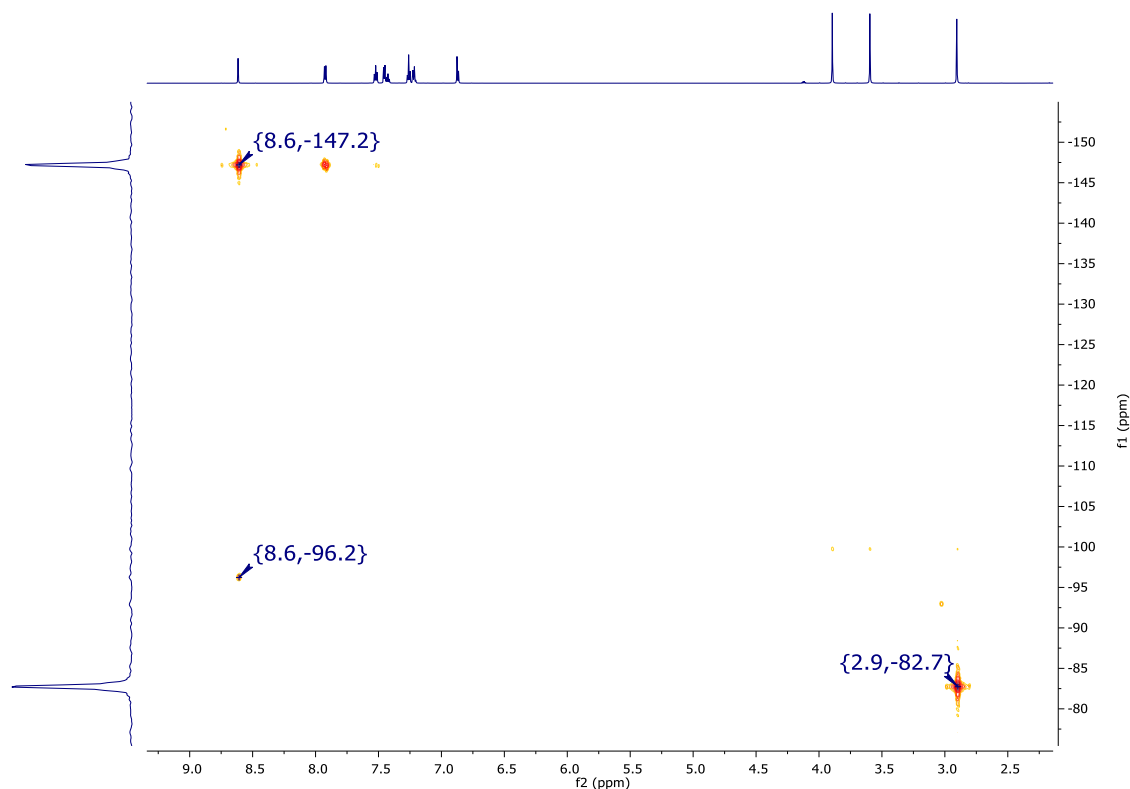

**Figure S88.** 7-(3,4-Dimethoxyphenyl)-4-methyl-2,6-diphenyl-2*H*-pyrazolo[4,3-*c*]pyridine (**28**).  $^1\text{H}$ - $^{15}\text{N}$  HMBC spectrum (700 MHz,  $\text{CDCl}_3$ ).

**+MS, 6.0min #359**

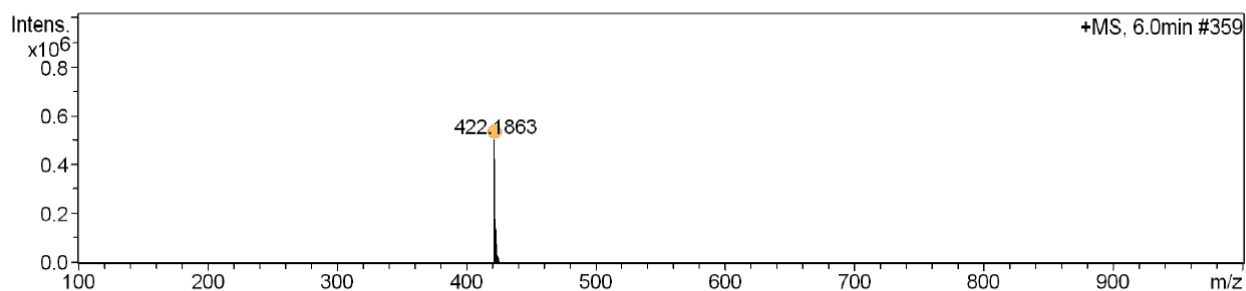

| Meas. m/z | # | Ion Formula                                                   | m/z      | err [ppm] | mSigma | # Sigma | Score  | rdb  | e <sup>-</sup> Conf | N-Rule |
|-----------|---|---------------------------------------------------------------|----------|-----------|--------|---------|--------|------|---------------------|--------|
| 422.1863  | 1 | C <sub>27</sub> H <sub>24</sub> N <sub>3</sub> O <sub>2</sub> | 422.1863 | -0.1      | 2.3    | 1       | 100.00 | 17.5 | even                | ok     |

**Figure S89.** 7-(3,4-Dimethoxyphenyl)-4-methyl-2,6-diphenyl-2*H*-pyrazolo[4,3-*c*]pyridine (**28**). HRMS (ESI-TOF).

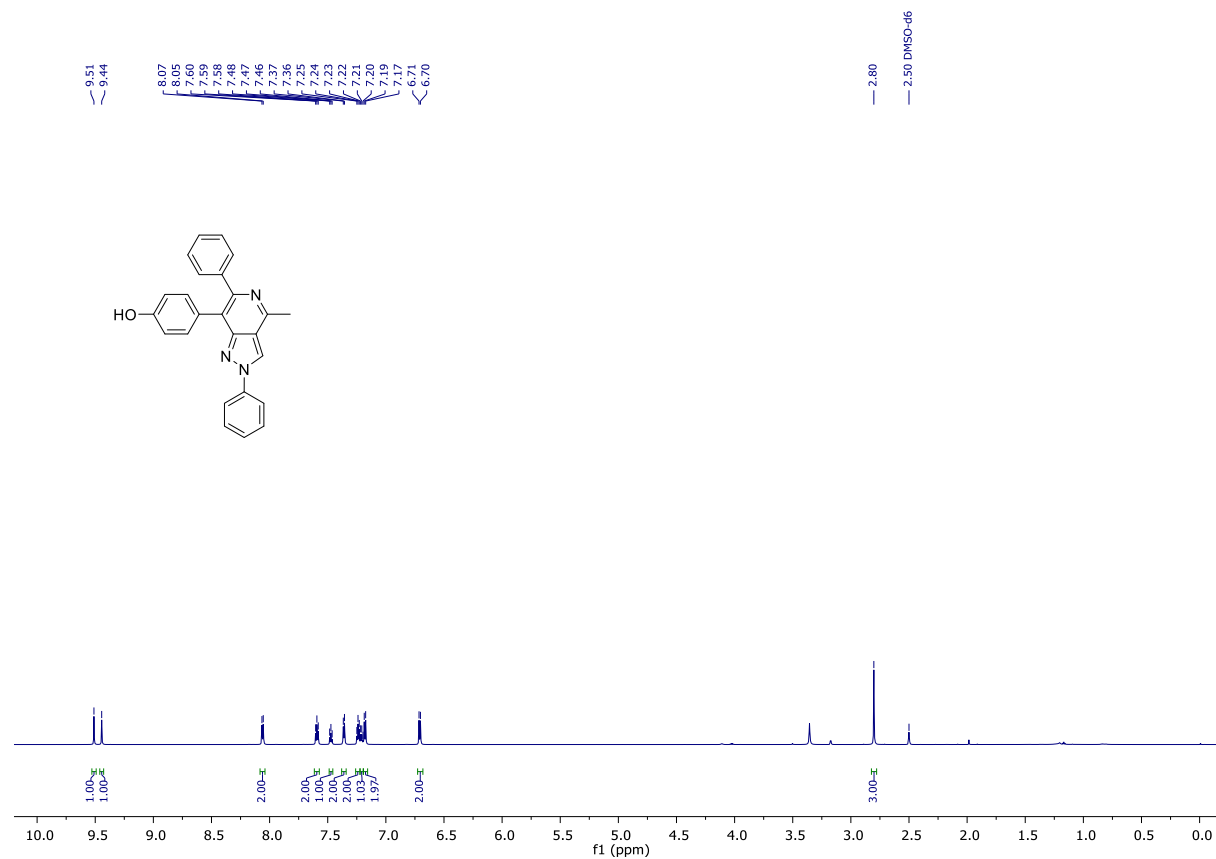

**Figure S90.** 4-(4-Methyl-2,6-diphenyl-2H-pyrazolo[4,3-c]pyridin-7-yl)phenol (**29**). <sup>1</sup>H NMR spectrum (700 MHz, DMSO-*d*<sub>6</sub>).

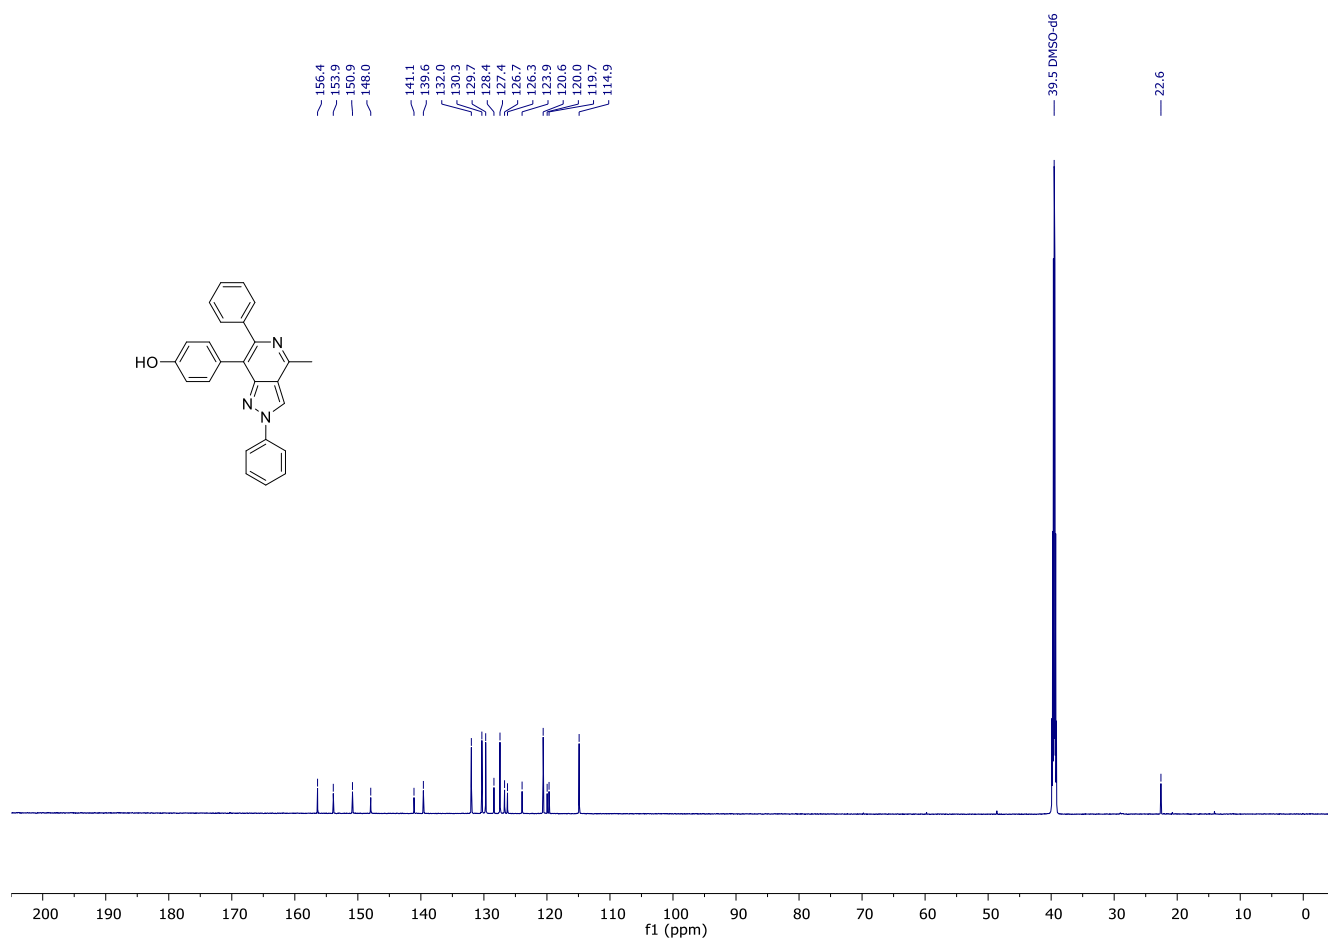

**Figure S91.** 4-(4-Methyl-2,6-diphenyl-2H-pyrazolo[4,3-c]pyridin-7-yl)phenol (**29**). <sup>13</sup>C NMR (176 MHz, DMSO-*d*<sub>6</sub>).

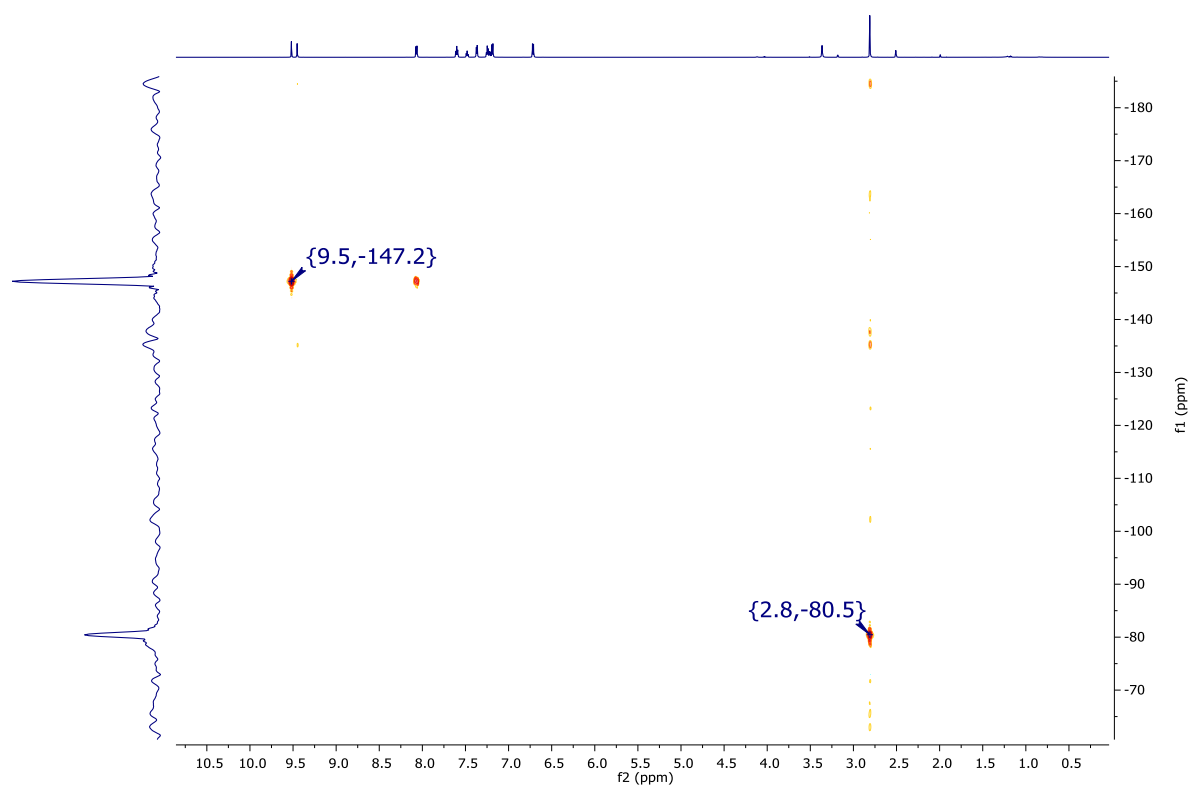

**Figure S92.** 4-(4-Methyl-2,6-diphenyl-2*H*-pyrazolo[4,3-*c*]pyridin-7-yl)phenol (**29**).  $^1\text{H}$ - $^{15}\text{N}$  HMBC spectrum (700 MHz,  $\text{DMSO-}d_6$ ).

**+MS, 8.4min #505**

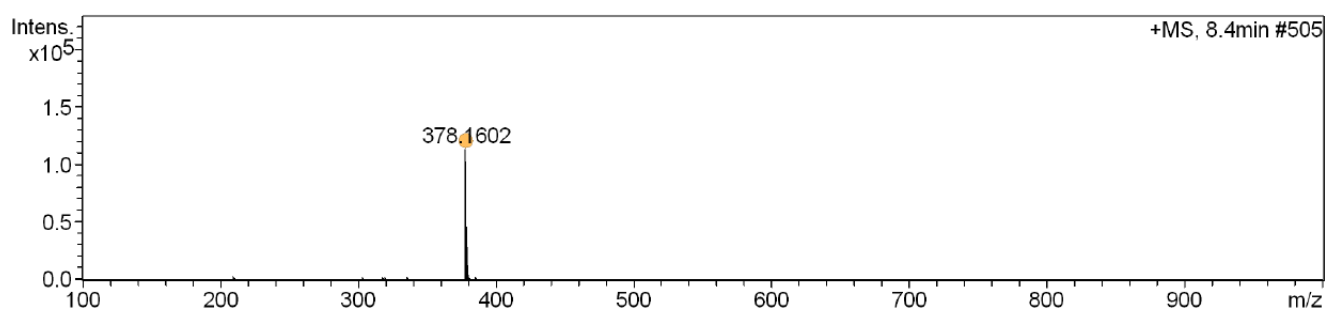

| Meas. m/z | # | Ion Formula                                      | m/z      | err [ppm] | mSigma | # Sigma | Score  | rdb  | e <sup>-</sup> | Conf | N-Rule |
|-----------|---|--------------------------------------------------|----------|-----------|--------|---------|--------|------|----------------|------|--------|
| 378.1602  | 1 | C <sub>25</sub> H <sub>20</sub> N <sub>3</sub> O | 378.1601 | -0.4      | 1.7    | 1       | 100.00 | 17.5 | even           |      | ok     |

**Figure S93.** 4-(4-Methyl-2,6-diphenyl-2*H*-pyrazolo[4,3-*c*]pyridin-7-yl)phenol (**29**). HRMS (ESI-TOF).



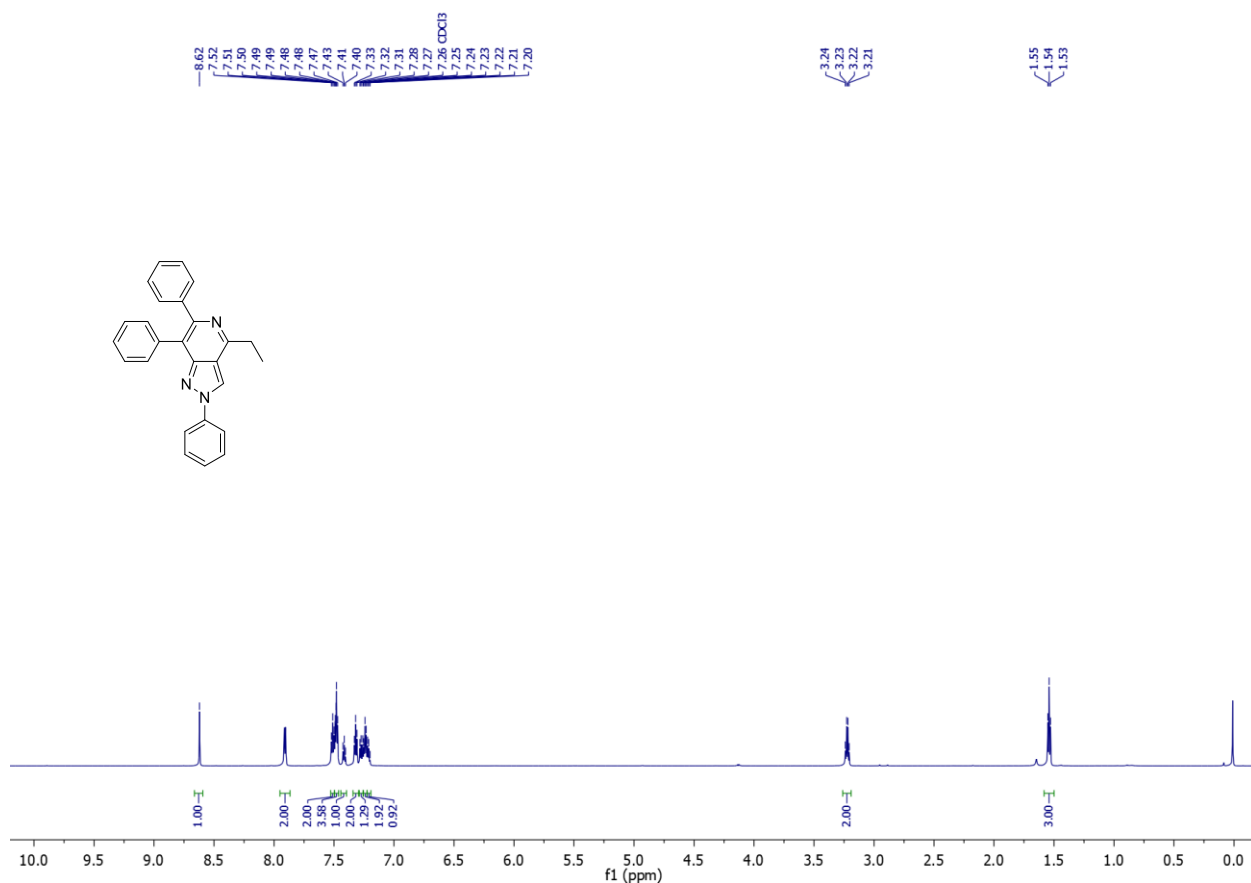

**Figure S94.** 4-Ethyl-2,6,7-triphenyl-2*H*-pyrazolo[4,3-*c*]pyridine (**30**). <sup>1</sup>H NMR spectrum (700 MHz, CDCl<sub>3</sub>).

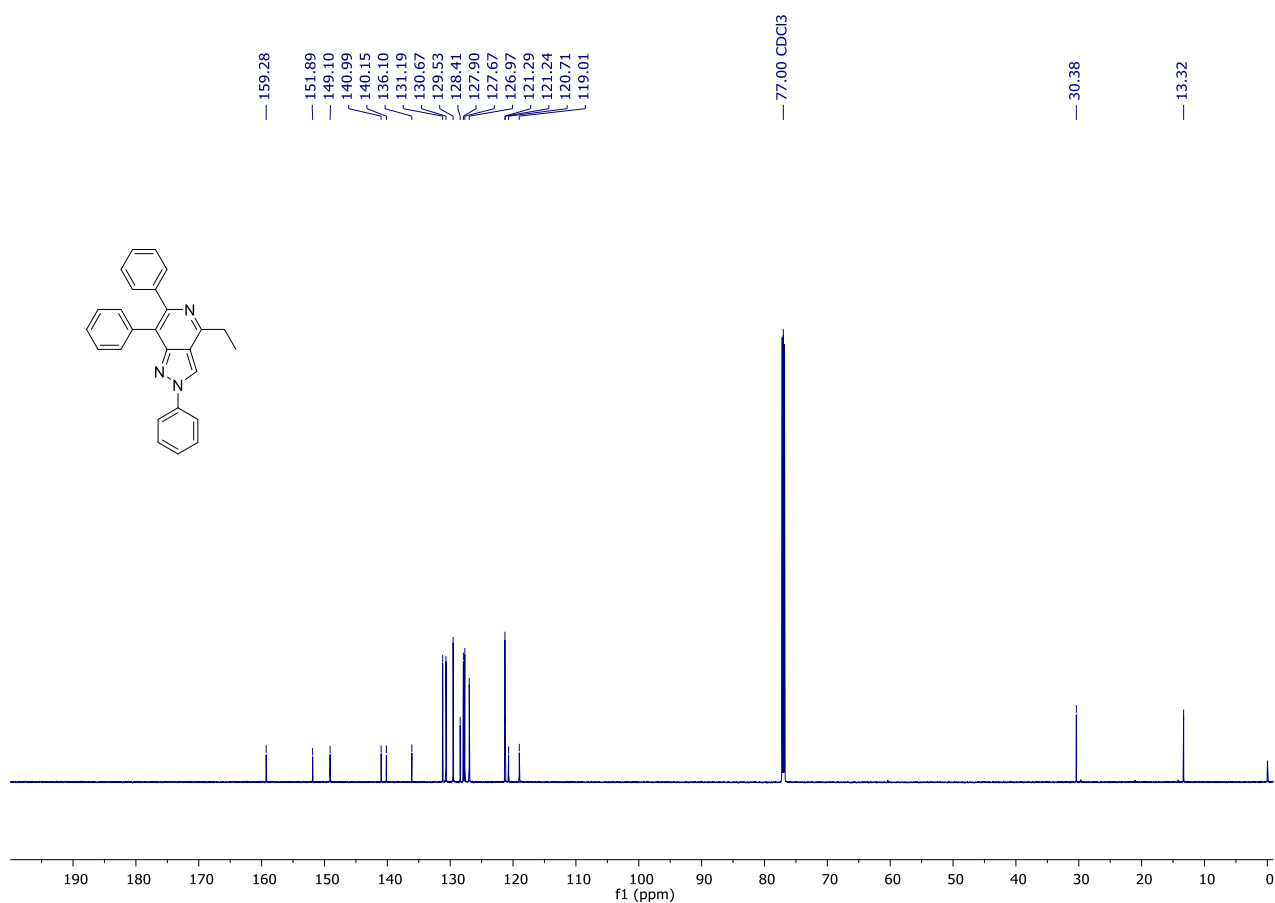

**Figure S95.** 4-Ethyl-2,6,7-triphenyl-2*H*-pyrazolo[4,3-*c*]pyridine (**30**). <sup>13</sup>C NMR (176 MHz, CDCl<sub>3</sub>).

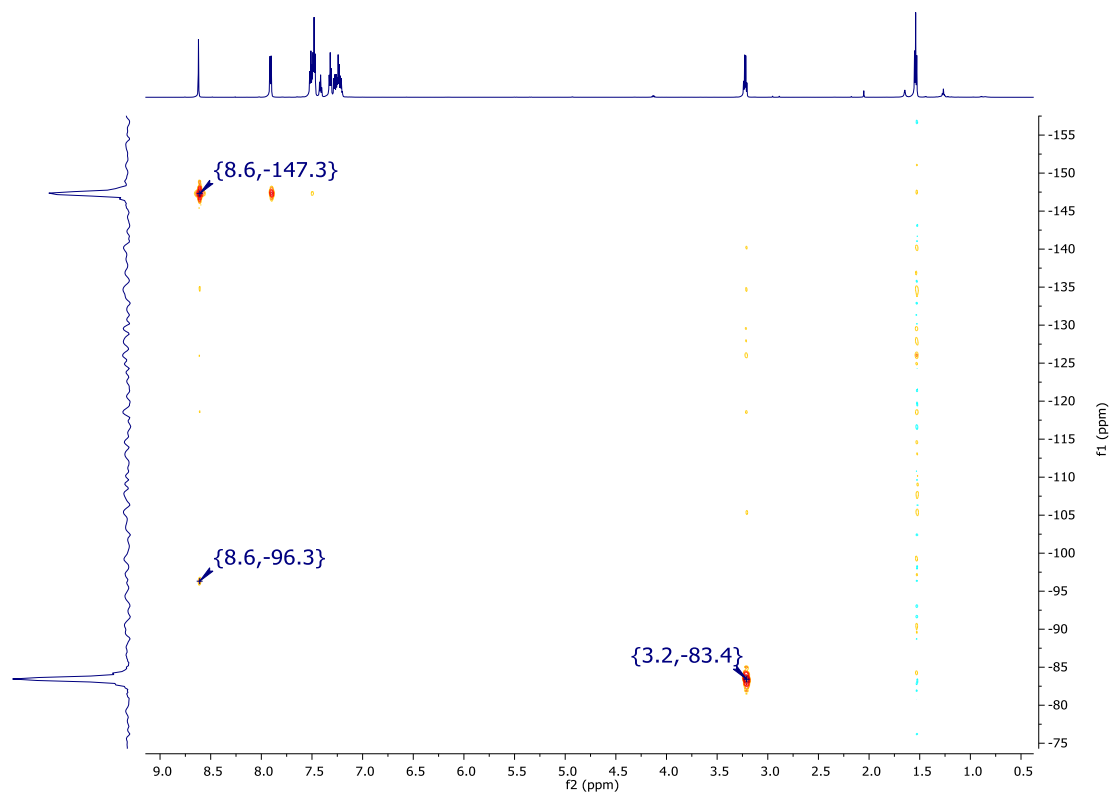

**Figure S96.** 4-Ethyl-2,6,7-triphenyl-2*H*-pyrazolo[4,3-*c*]pyridine (**30**).  $^1\text{H}$ - $^{15}\text{N}$  HMBC spectrum (700 MHz,  $\text{CDCl}_3$ ).

**+MS, 4.7min #284**

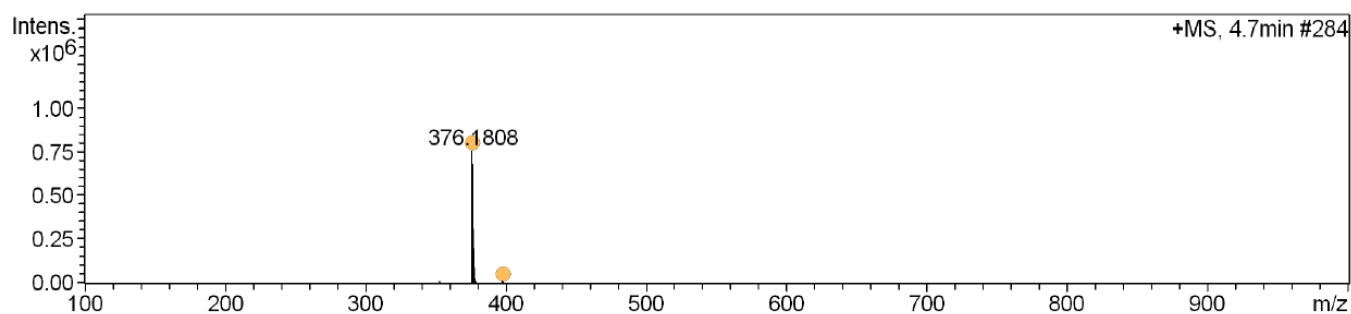

| Meas. m/z | # | Ion Formula                                       | m/z      | err [ppm] | mSigma | # Sigma | Score  | rdb  | e <sup>-</sup> | Conf | N-Rule |
|-----------|---|---------------------------------------------------|----------|-----------|--------|---------|--------|------|----------------|------|--------|
| 376.1808  | 1 | C <sub>26</sub> H <sub>22</sub> N <sub>3</sub>    | 376.1808 | 0.1       | 2.5    | 1       | 100.00 | 17.5 | even           |      | ok     |
| 398.1611  | 1 | C <sub>26</sub> H <sub>21</sub> N <sub>3</sub> Na | 398.1628 | 4.2       | 33.1   | 1       | 100.00 | 17.5 | even           |      | ok     |

**Figure S97.** 4-Ethyl-2,6,7-triphenyl-2*H*-pyrazolo[4,3-*c*]pyridine (**30**). HRMS (ESI-TOF).

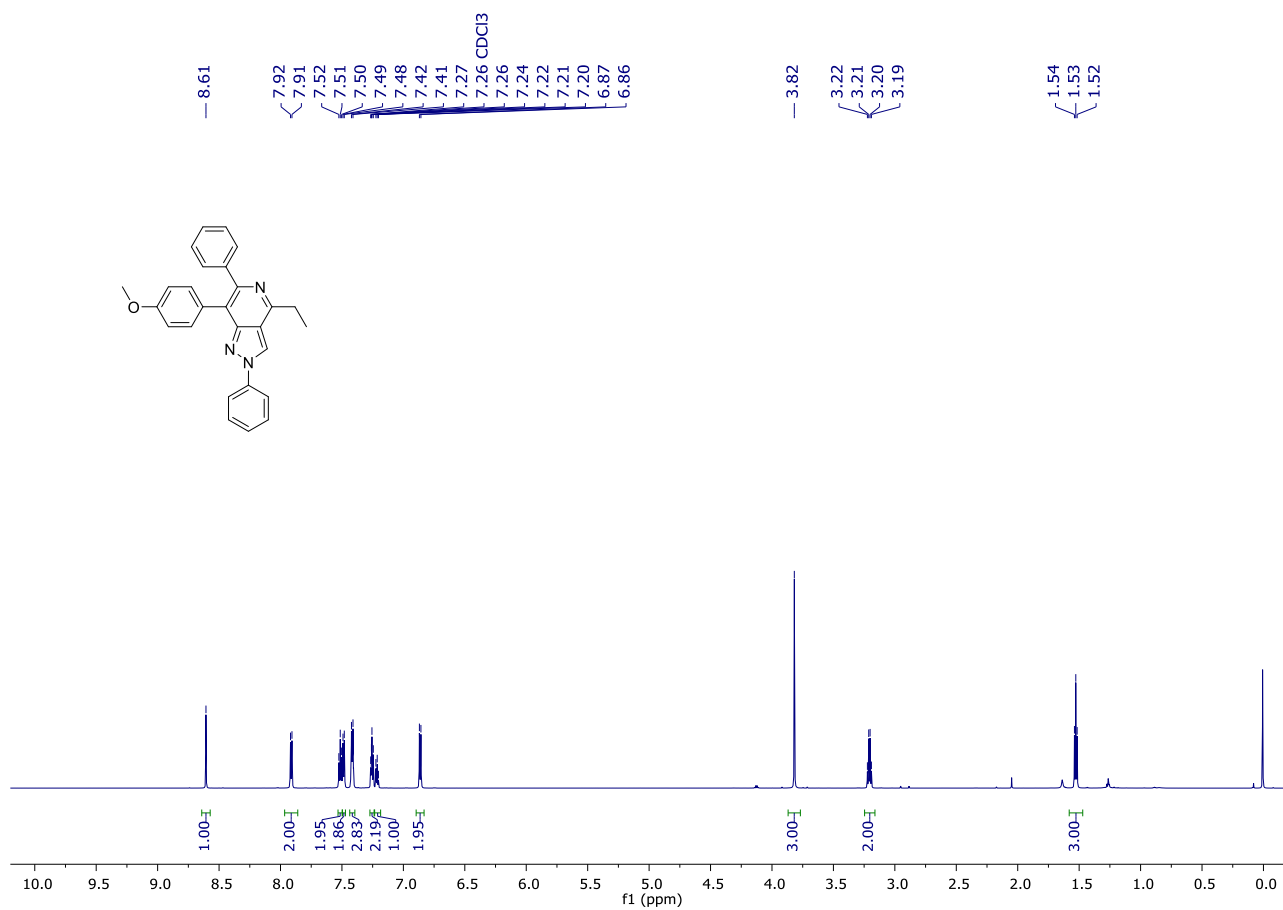

**Figure S98.** 4-Ethyl-7-(4-methoxyphenyl)-2,6-diphenyl-2H-pyrazolo[4,3-c]pyridine (**31**). <sup>1</sup>H NMR spectrum (700 MHz, CDCl<sub>3</sub>).

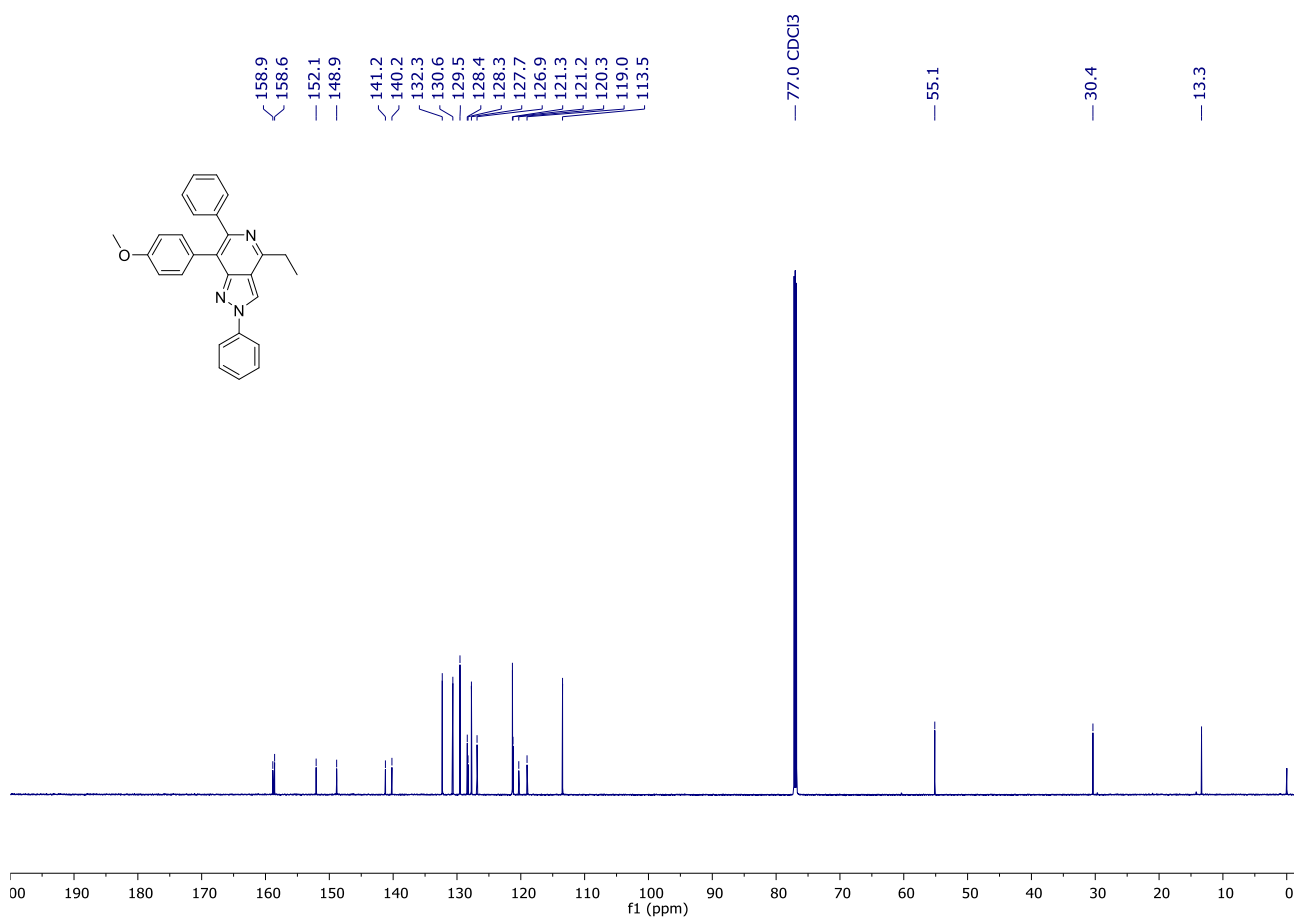

**Figure S99.** 4-Ethyl-7-(4-methoxyphenyl)-2,6-diphenyl-2H-pyrazolo[4,3-c]pyridine (**31**). <sup>13</sup>C NMR (176 MHz, CDCl<sub>3</sub>).

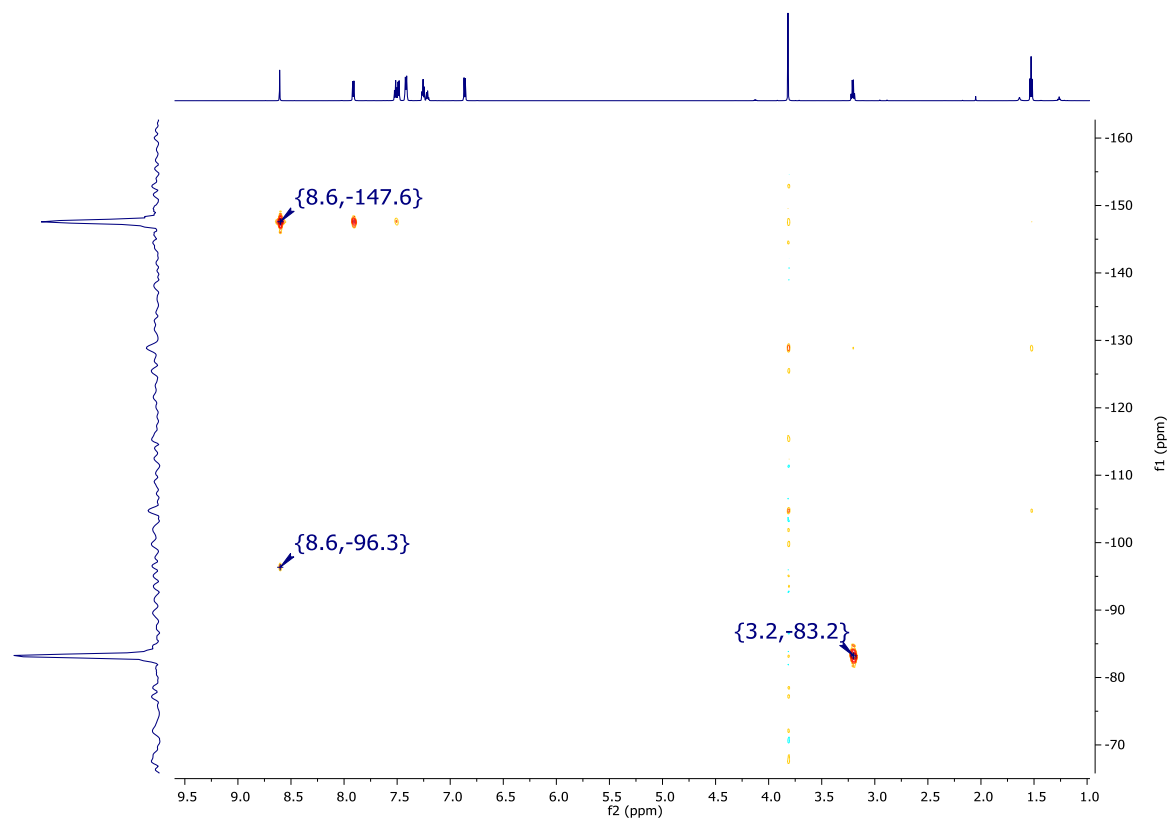

**Figure S100.** 4-Ethyl-7-(4-methoxyphenyl)-2,6-diphenyl-2*H*-pyrazolo[4,3-*c*]pyridine (**31**).  $^1\text{H}$ - $^{15}\text{N}$  HMBC spectrum (700 MHz,  $\text{CDCl}_3$ ).

**+MS, 9.2min #550**

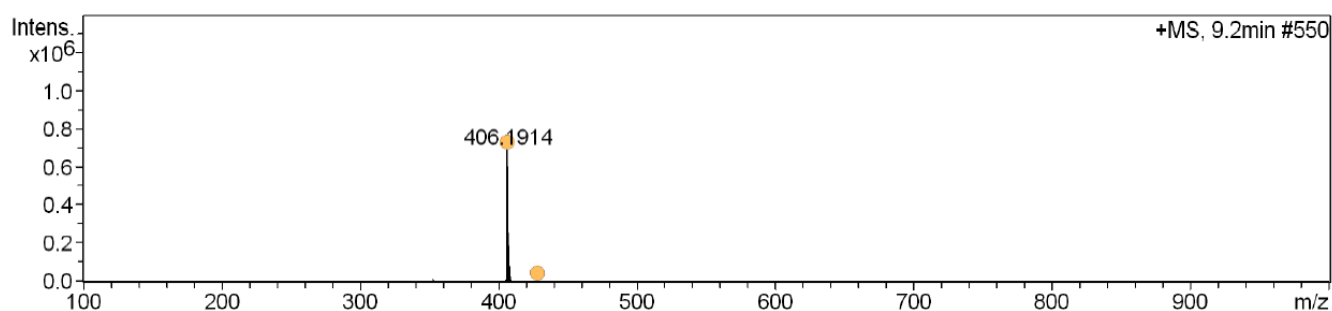

| Meas. m/z | # | Ion Formula                                        | m/z      | err [ppm] | mSigma | # Sigma | Score  | rdB  | e <sup>-</sup> Conf | N-Rule |
|-----------|---|----------------------------------------------------|----------|-----------|--------|---------|--------|------|---------------------|--------|
| 406.1914  | 1 | C <sub>27</sub> H <sub>24</sub> N <sub>3</sub> O   | 406.1914 | -0.0      | 2.1    | 1       | 100.00 | 17.5 | even                | ok     |
| 428.1745  | 1 | C <sub>27</sub> H <sub>23</sub> N <sub>3</sub> NaO | 428.1733 | -2.8      | 25.2   | 1       | 100.00 | 17.5 | even                | ok     |

**Figure S101.** 4-Ethyl-7-(4-methoxyphenyl)-2,6-diphenyl-2*H*-pyrazolo[4,3-*c*]pyridine (**31**). HRMS (ESI-TOF).

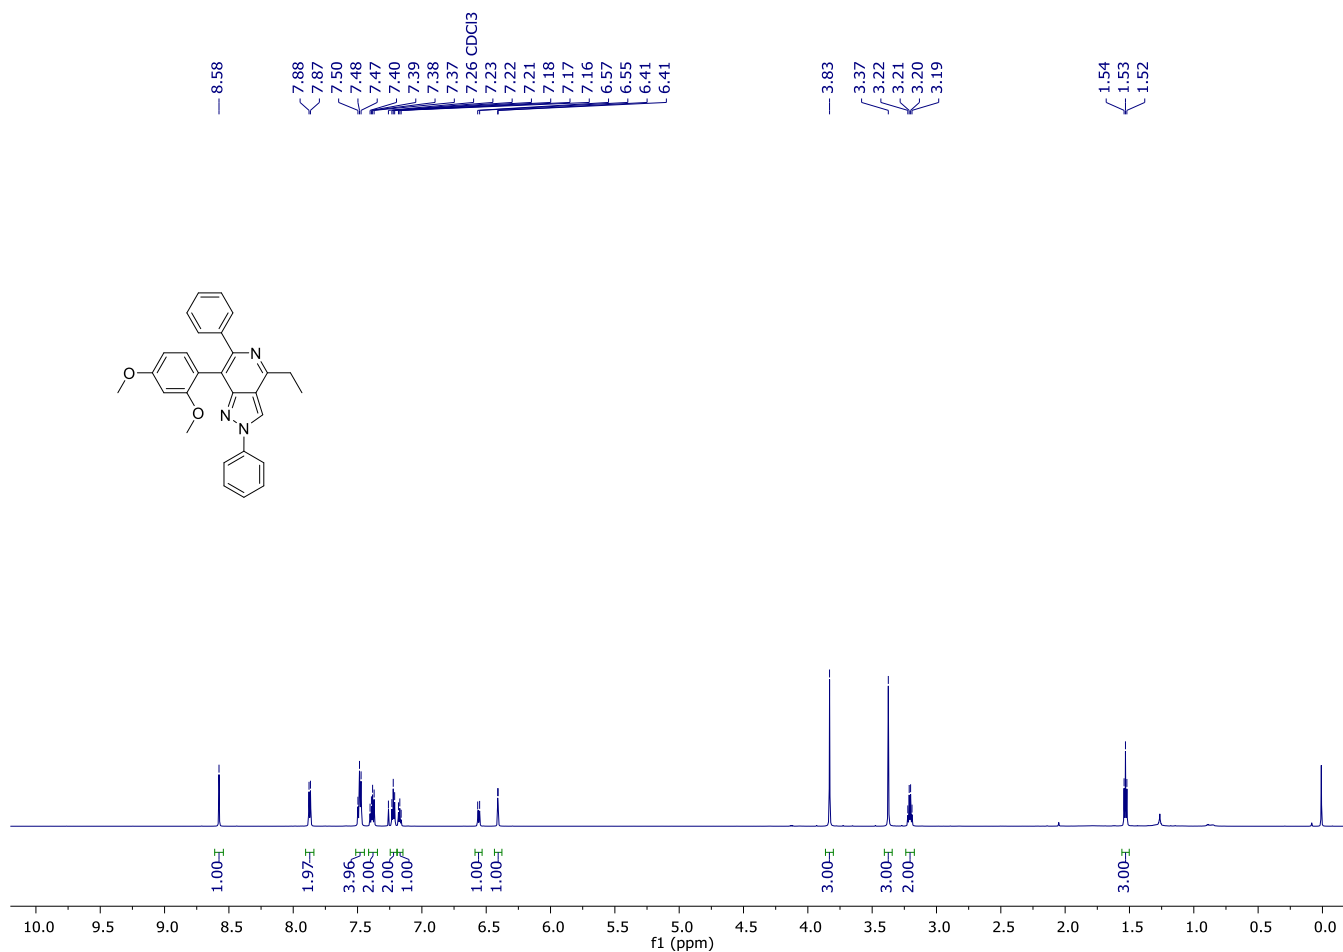

**Figure S102.** 7-(2,4-Dimethoxyphenyl)-4-ethyl-2,6-diphenyl-2*H*-pyrazolo[4,3-*c*]pyridine (**32**). <sup>1</sup>H NMR spectrum (700 MHz, CDCl<sub>3</sub>).

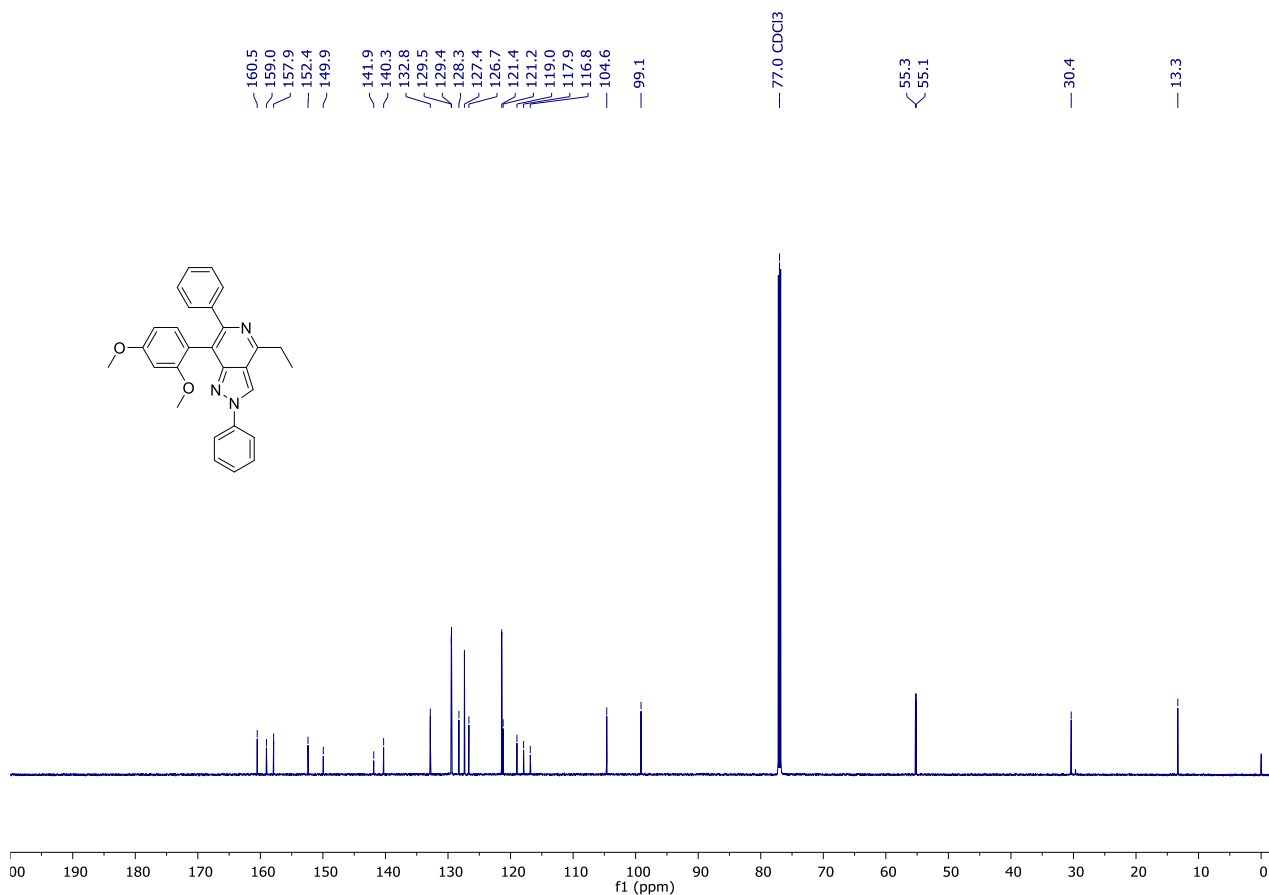

**Figure S103.** 7-(2,4-Dimethoxyphenyl)-4-ethyl-2,6-diphenyl-2*H*-pyrazolo[4,3-*c*]pyridine (**32**). <sup>13</sup>C NMR (176 MHz, CDCl<sub>3</sub>).

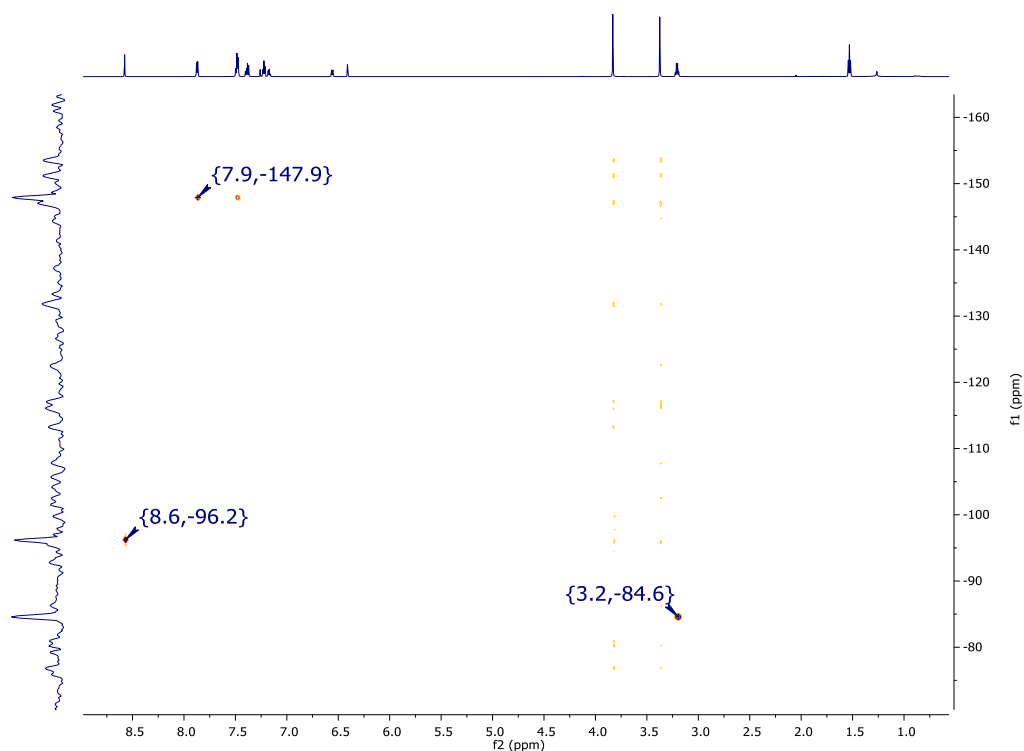

**Figure S104.** 7-(2,4-Dimethoxyphenyl)-4-ethyl-2,6-diphenyl-2*H*-pyrazolo[4,3-*c*]pyridine (**32**).  $^1\text{H}$ - $^{15}\text{N}$  LR HSQMBBC spectrum (700 MHz,  $\text{CDCl}_3$ ).

**+MS, 4.1min #243**

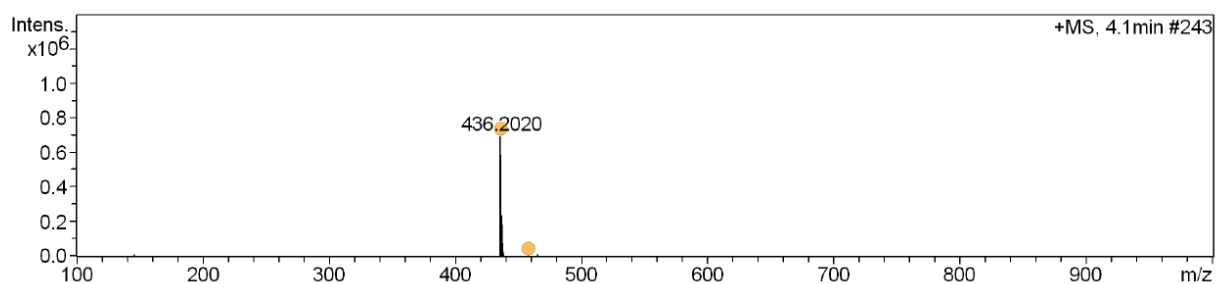

| Meas. m/z | # | Ion Formula                                                     | m/z      | err [ppm] | mSigma | # Sigma | Score  | rdb  | e <sup>-</sup> | Conf | N-Rule |
|-----------|---|-----------------------------------------------------------------|----------|-----------|--------|---------|--------|------|----------------|------|--------|
| 436.2020  | 1 | C <sub>28</sub> H <sub>26</sub> N <sub>3</sub> O <sub>2</sub>   | 436.2020 | -0.2      | 2.7    | 1       | 100.00 | 17.5 | even           |      | ok     |
| 458.1873  | 1 | C <sub>28</sub> H <sub>25</sub> N <sub>3</sub> NaO <sub>2</sub> | 458.1839 | 7.5       | 98.4   | 1       | 100.00 | 17.5 | even           |      | ok     |

**Figure S105.** 7-(2,4-Dimethoxyphenyl)-4-ethyl-2,6-diphenyl-2*H*-pyrazolo[4,3-*c*]pyridine (**32**). HRMS (ESI-TOF).

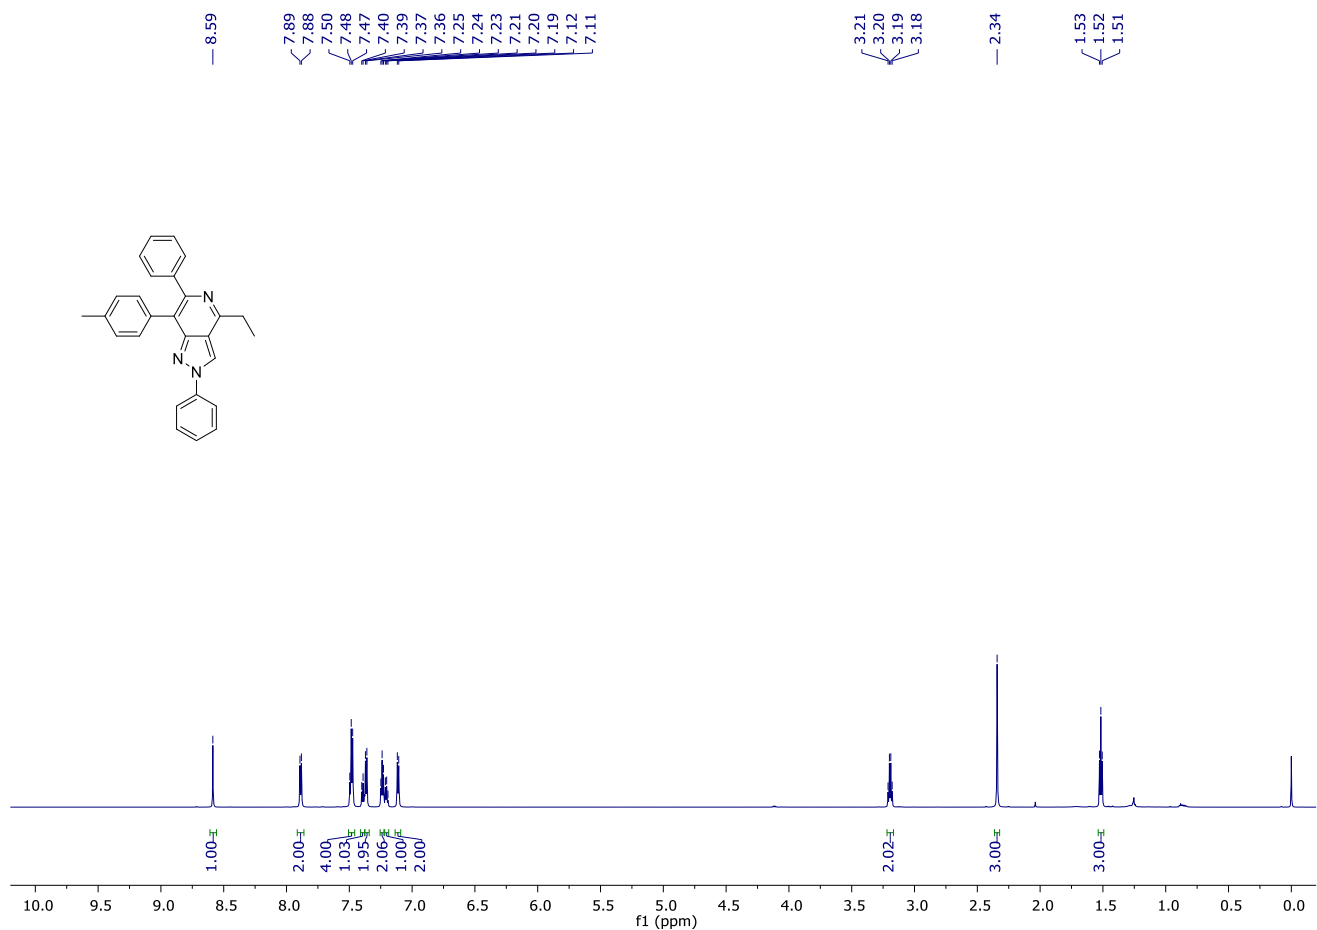

**Figure S106.** 4-Ethyl-2,6-diphenyl-7-(*p*-tolyl)-2*H*-pyrazolo[4,3-*c*]pyridine (**33**). <sup>1</sup>H NMR spectrum (700 MHz, CDCl<sub>3</sub>).

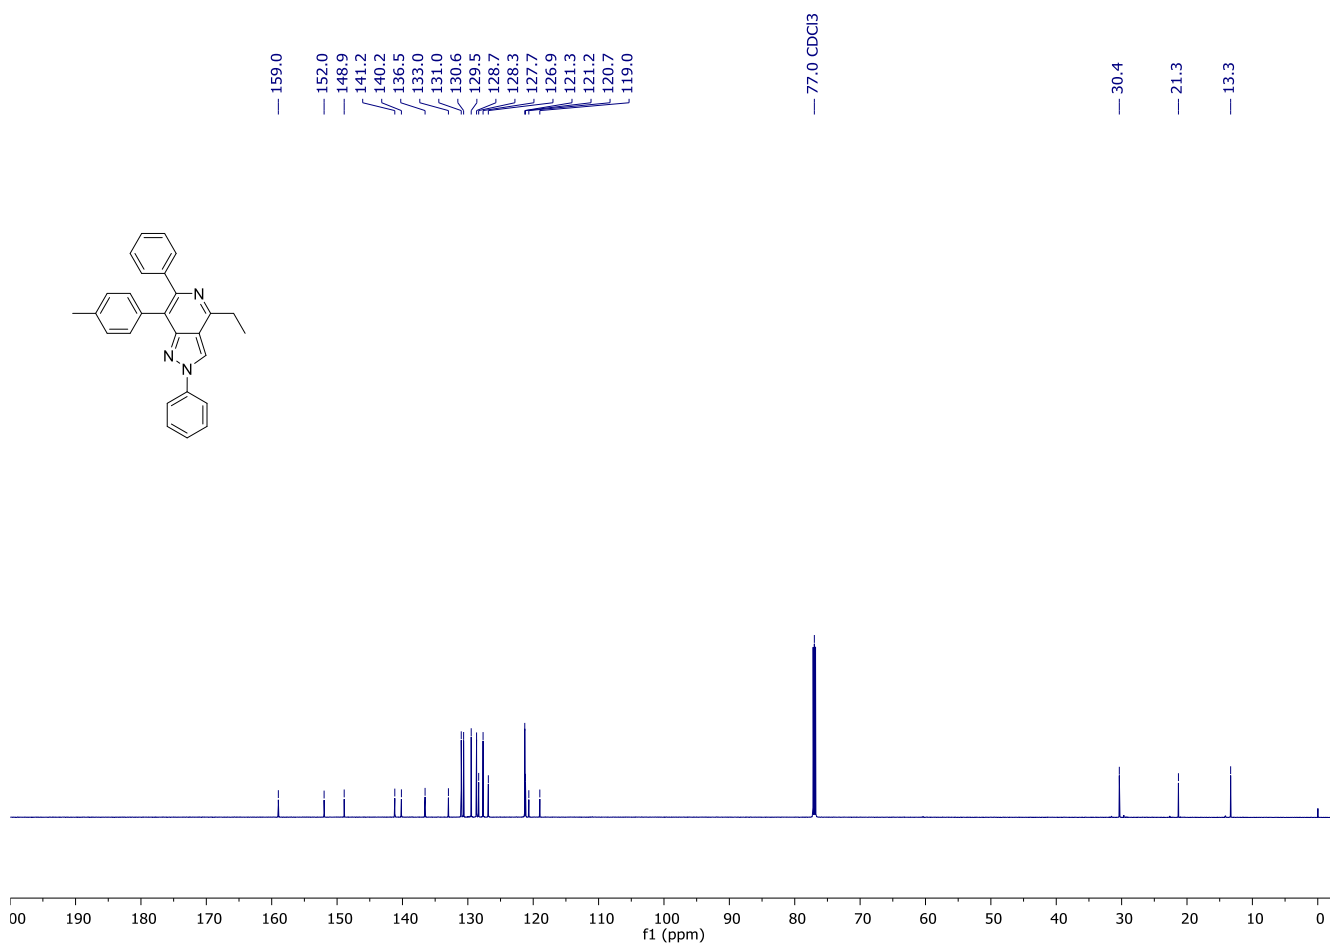

**Figure S107.** 4-Ethyl-2,6-diphenyl-7-(*p*-tolyl)-2*H*-pyrazolo[4,3-*c*]pyridine (**33**). <sup>13</sup>C NMR (176 MHz, CDCl<sub>3</sub>).

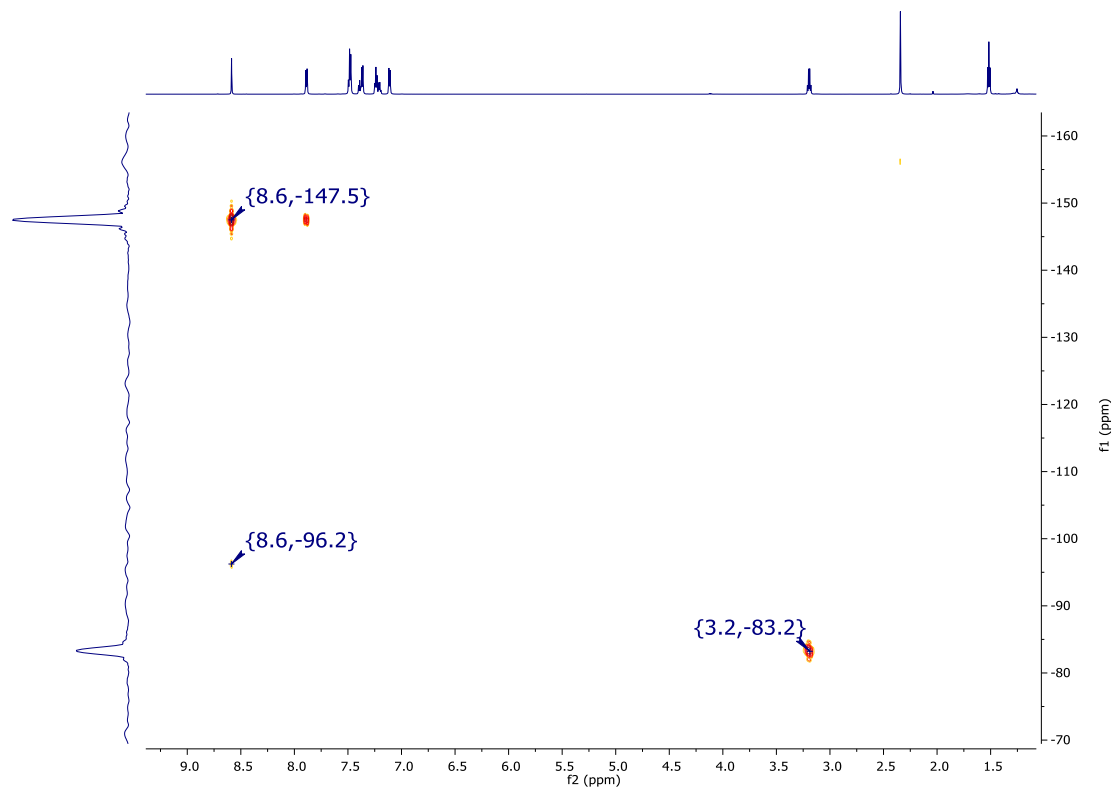

**Figure S108.** 4-Ethyl-2,6-diphenyl-7-(*p*-tolyl)-2*H*-pyrazolo[4,3-*c*]pyridine (**33**).  $^1\text{H}$ - $^{15}\text{N}$  HMBC spectrum (700 MHz,  $\text{CDCl}_3$ ).

**+MS, 4.0min #239**

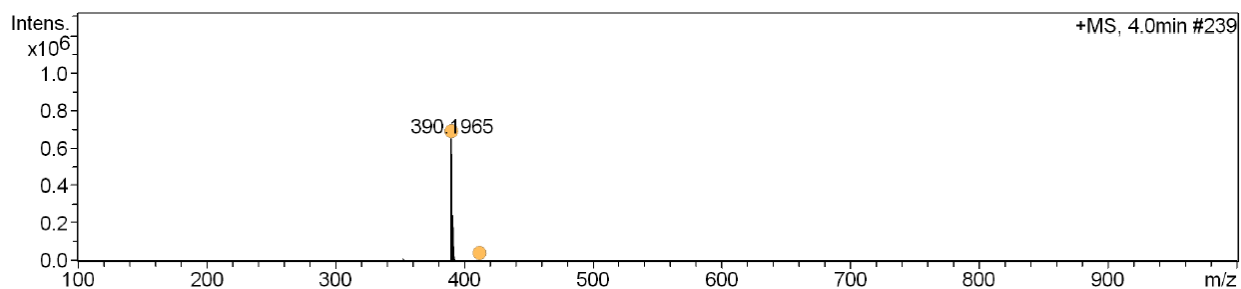

| Meas. m/z | # | Ion Formula                                       | m/z      | err [ppm] | mSigma | # Sigma | Score  | rdb  | e <sup>-</sup> Conf | N-Rule |
|-----------|---|---------------------------------------------------|----------|-----------|--------|---------|--------|------|---------------------|--------|
| 390.1965  | 1 | C <sub>27</sub> H <sub>24</sub> N <sub>3</sub>    | 390.1965 | -0.2      | 3.5    | 1       | 100.00 | 17.5 | even                | ok     |
| 412.1796  | 1 | C <sub>27</sub> H <sub>23</sub> N <sub>3</sub> Na | 412.1784 | -2.8      | 772.2  | 1       | -1.#J  | 17.5 | even                | ok     |

**Figure S109.** 4-Ethyl-2,6-diphenyl-7-(*p*-tolyl)-2*H*-pyrazolo[4,3-*c*]pyridine (**33**). HRMS (ESI-TOF).



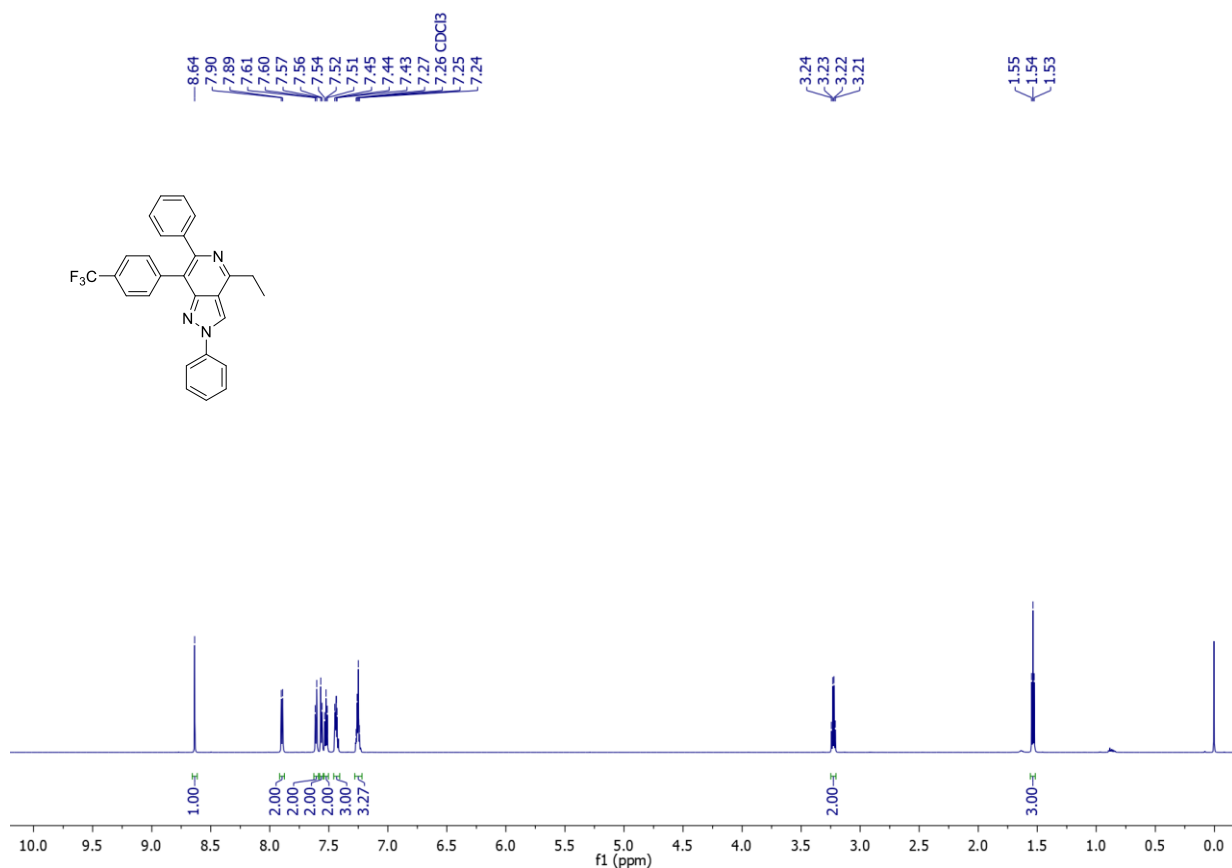

**Figure S110.** 4-Ethyl-2,6-diphenyl-7-(4-(trifluoromethyl)phenyl)-2H-pyrazolo[4,3-c]pyridine (**34**). <sup>1</sup>H NMR spectrum (700 MHz, CDCl<sub>3</sub>).

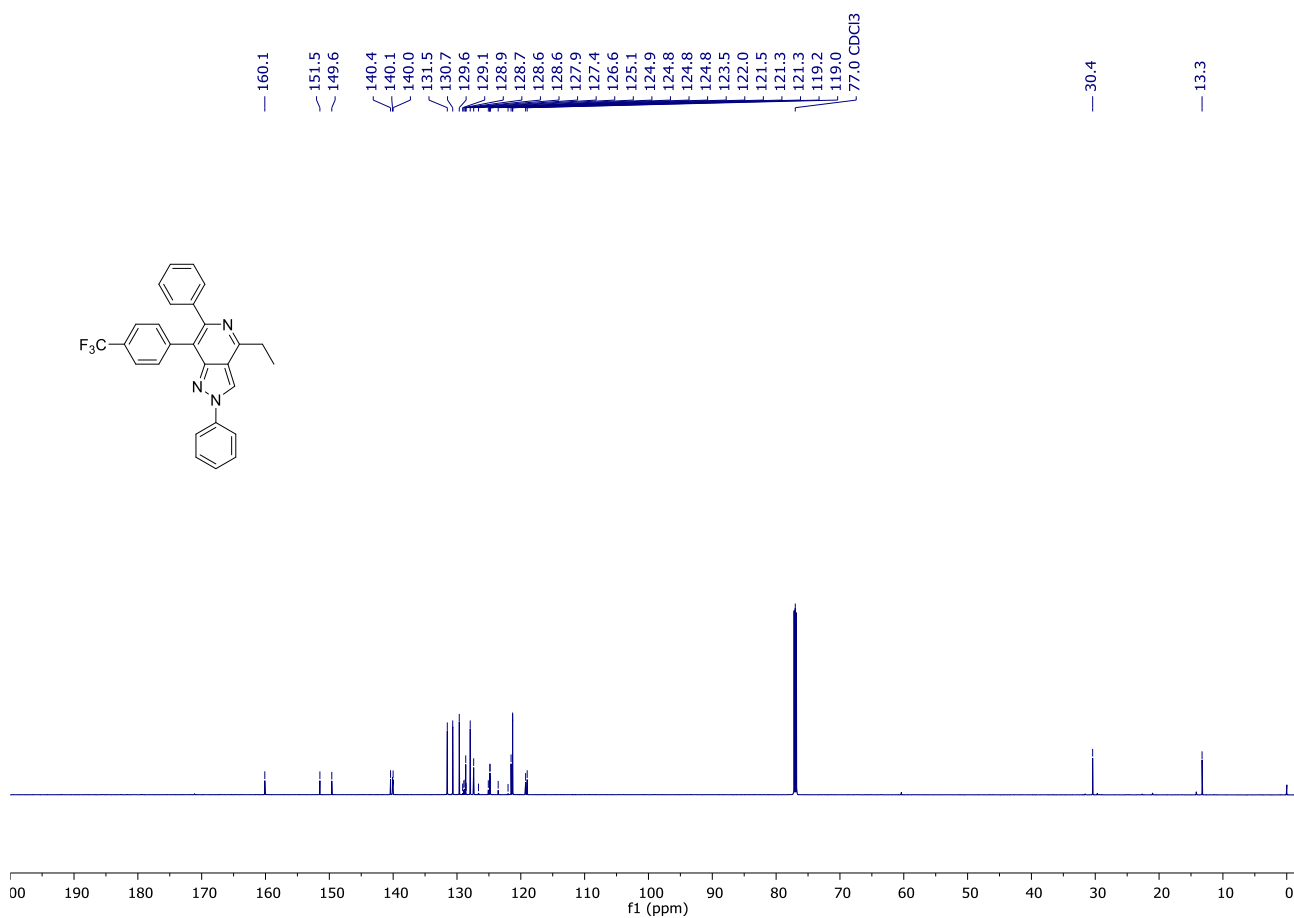

**Figure S111.** 4-Ethyl-2,6-diphenyl-7-(4-(trifluoromethyl)phenyl)-2H-pyrazolo[4,3-c]pyridine (**34**). <sup>13</sup>C NMR (176 MHz, CDCl<sub>3</sub>).

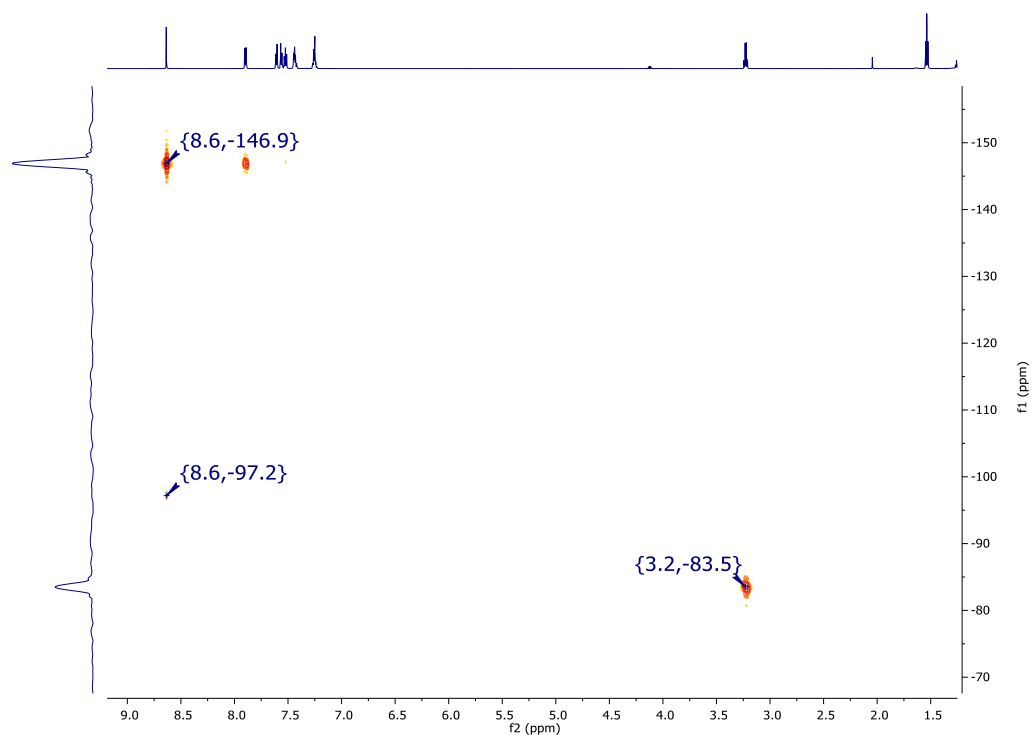

**Figure S112.** 4-Ethyl-2,6-diphenyl-7-(4-(trifluoromethyl)phenyl)-2*H*-pyrazolo[4,3-*c*]pyridine (**34**).  $^1\text{H}$ - $^{15}\text{N}$  HMBC spectrum (700 MHz,  $\text{CDCl}_3$ ).

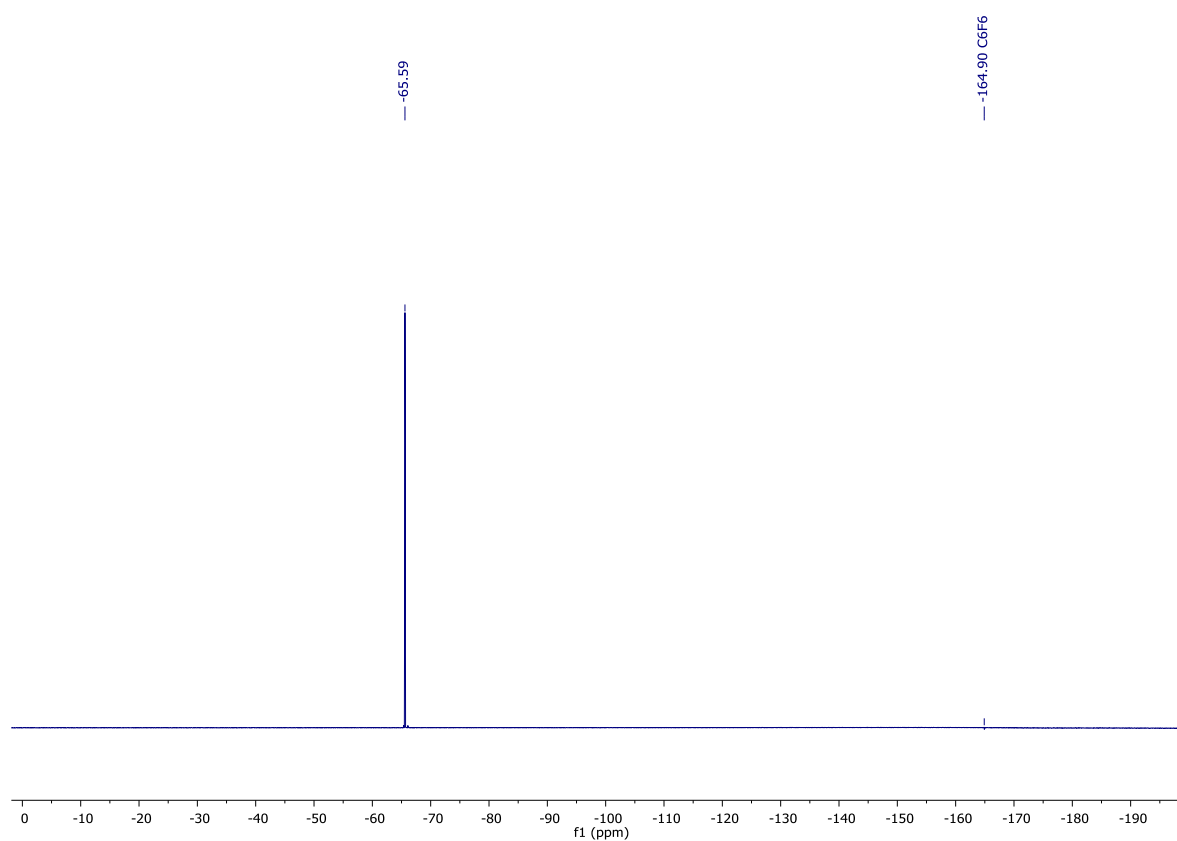

**Figure S113.** 4-Ethyl-2,6-diphenyl-7-(4-(trifluoromethyl)phenyl)-2*H*-pyrazolo[4,3-*c*]pyridine (**34**).  $^{19}\text{F}$  NMR spectrum (500 MHz,  $\text{CDCl}_3$ ).

**+MS, 3.3min #200**

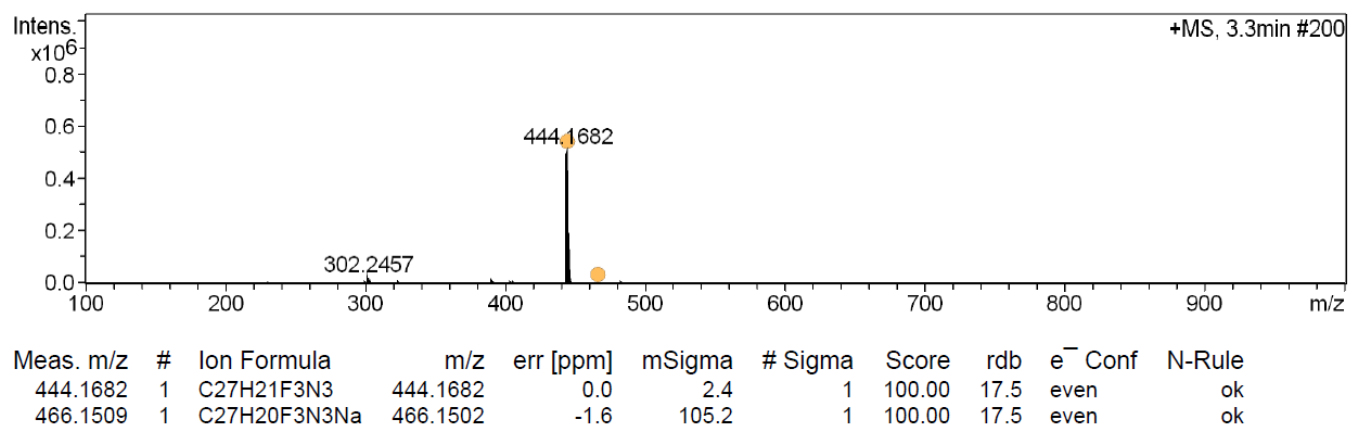

**Figure S114.** 4-Ethyl-2,6-diphenyl-7-(4-(trifluoromethyl)phenyl)-2*H*-pyrazolo[4,3-*c*]pyridine (**34**). HRMS (ESI-TOF).

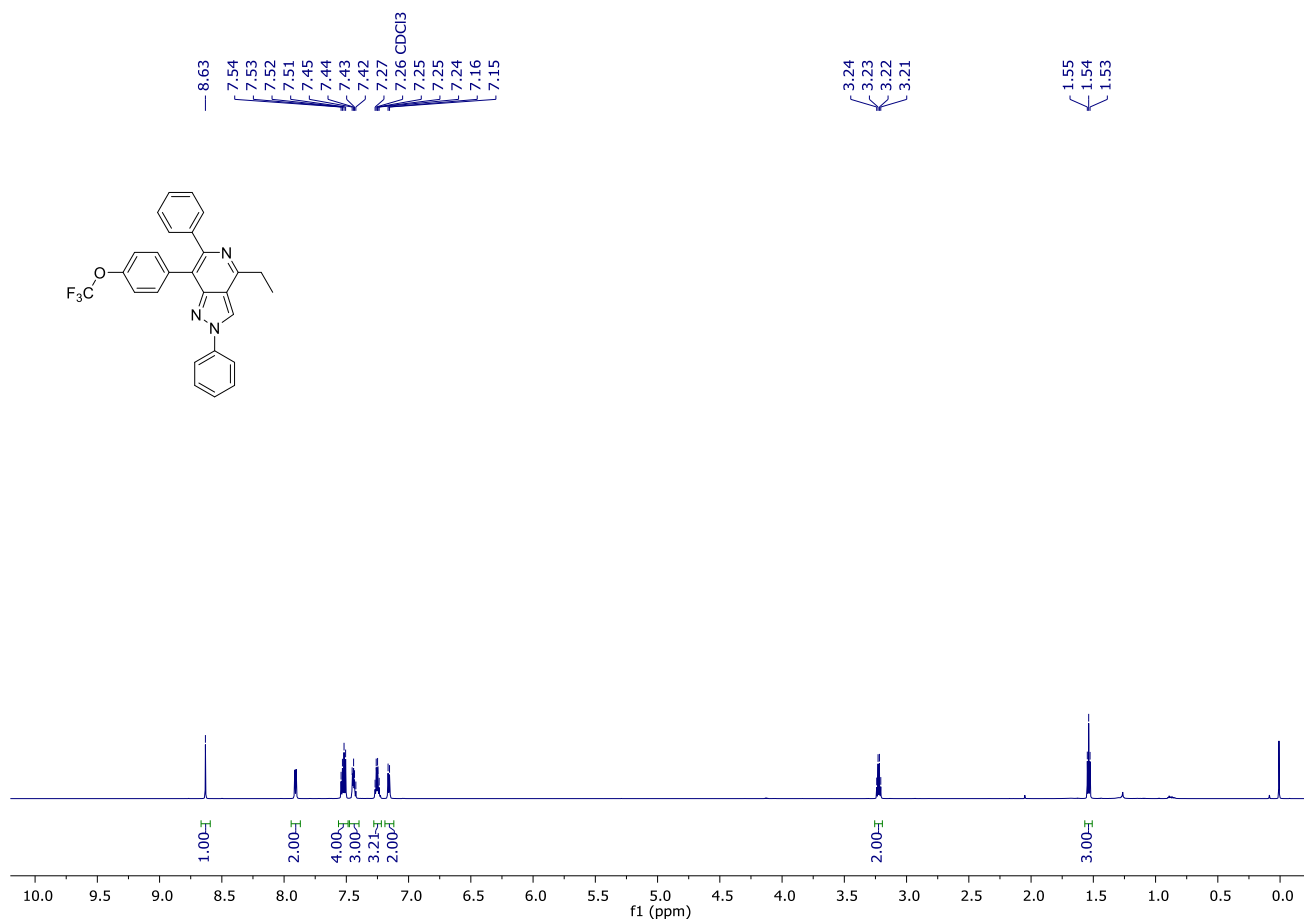

**Figure S115.** 4-Ethyl-2,6-diphenyl-7-(4-(trifluoromethoxy)phenyl)-2H-pyrazolo[4,3-c]pyridine (35). <sup>1</sup>H NMR spectrum (700 MHz, CDCl<sub>3</sub>).

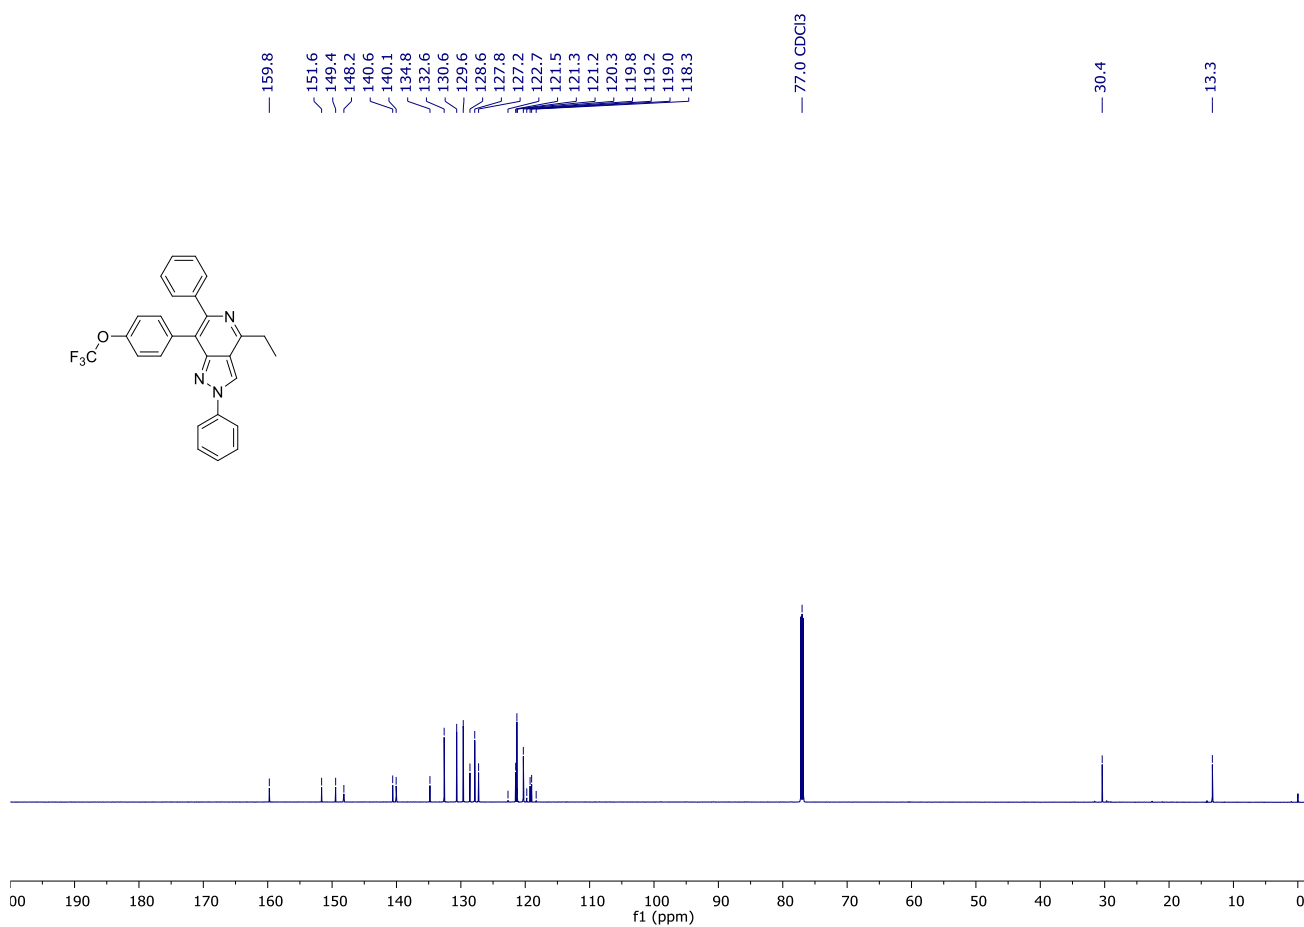

**Figure S116.** 4-Ethyl-2,6-diphenyl-7-(4-(trifluoromethoxy)phenyl)-2H-pyrazolo[4,3-c]pyridine (35). <sup>13</sup>C NMR (176 MHz, CDCl<sub>3</sub>).

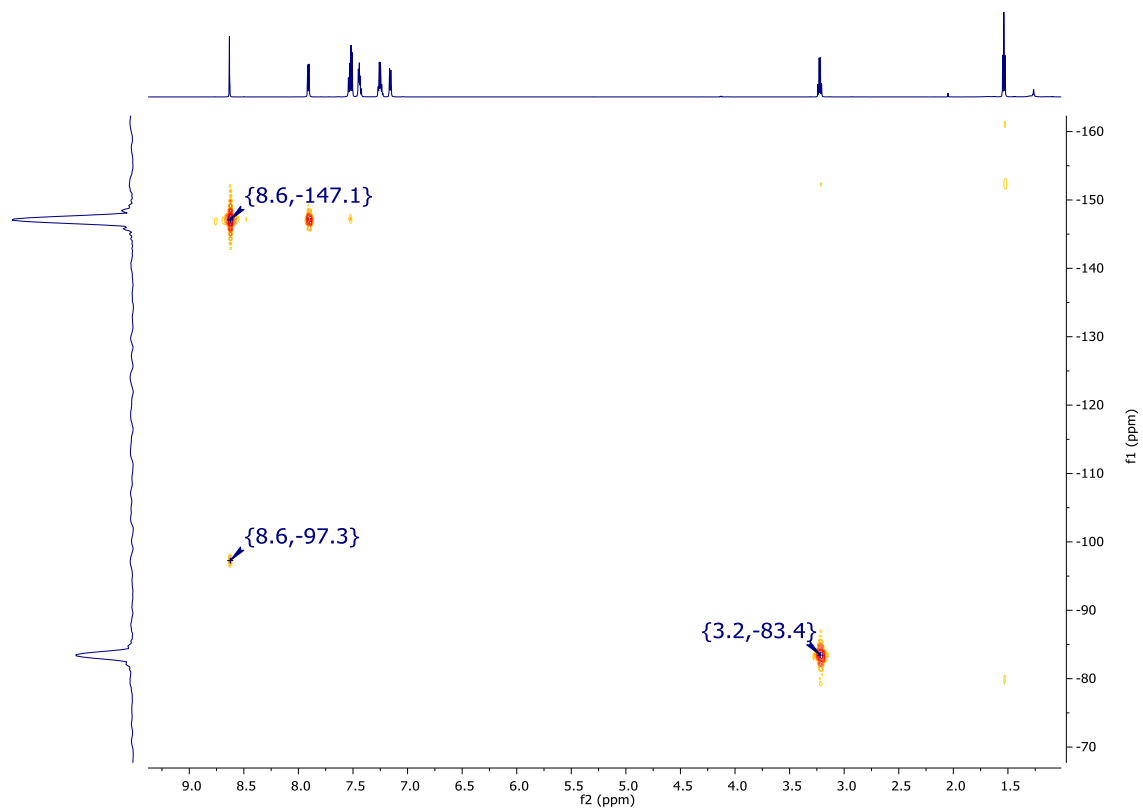

**Figure S117.** 4-Ethyl-2,6-diphenyl-7-(4-(trifluoromethoxy)phenyl)-2*H*-pyrazolo[4,3-*c*]pyridine (**35**).  $^1\text{H}$ - $^{15}\text{N}$  HMBC spectrum (700 MHz,  $\text{CDCl}_3$ ).

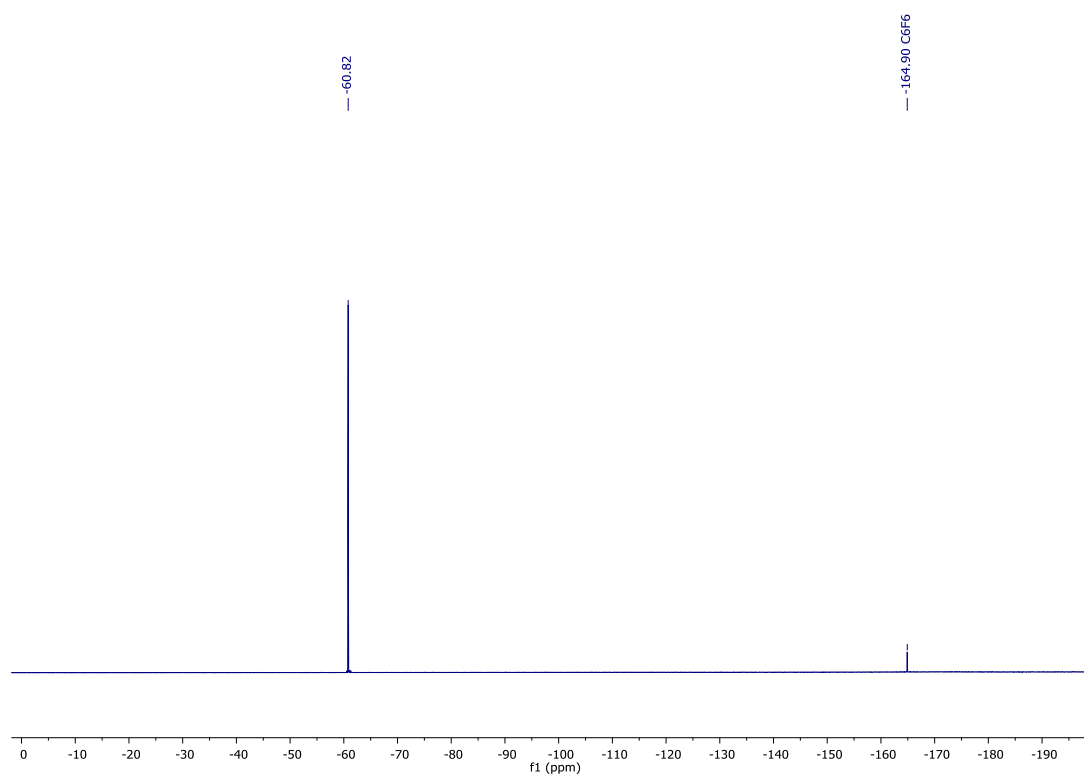

**Figure S118.** 4-Ethyl-2,6-diphenyl-7-(4-(trifluoromethoxy)phenyl)-2*H*-pyrazolo[4,3-*c*]pyridine (**35**).  $^{19}\text{F}$  NMR spectrum (500 MHz,  $\text{CDCl}_3$ ).

+MS, 3.1min #183

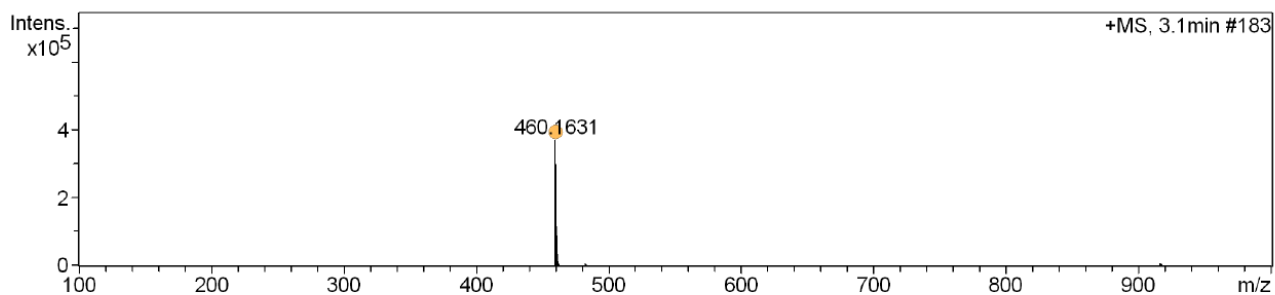

| Meas. m/z | # | Ion Formula                                                     | m/z      | err [ppm] | mSigma | # Sigma | Score  | rdb  | e <sup>-</sup> | Conf | N-Rule |
|-----------|---|-----------------------------------------------------------------|----------|-----------|--------|---------|--------|------|----------------|------|--------|
| 460.1631  | 1 | C <sub>27</sub> H <sub>21</sub> F <sub>3</sub> N <sub>3</sub> O | 460.1631 | 0.1       | 5.5    | 1       | 100.00 | 17.5 | even           |      | ok     |

**Figure S119.** 4-Ethyl-2,6-diphenyl-7-(4-(trifluoromethoxy)phenyl)-2*H*-pyrazolo[4,3-*c*]pyridine (**35**). HRMS (ESI-TOF).

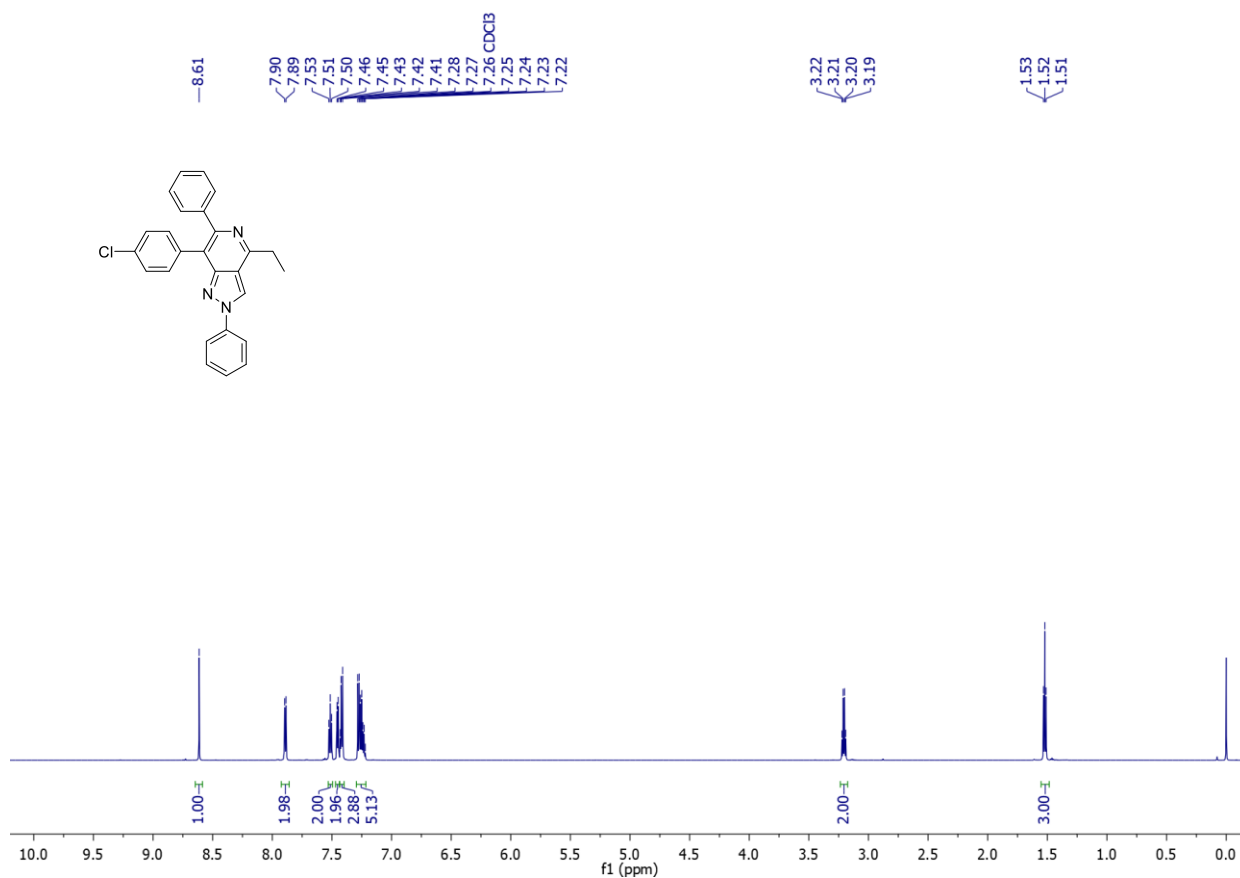

**Figure S120.** 7-(4-Chlorophenyl)-4-ethyl-2,6-diphenyl-2*H*-pyrazolo[4,3-*c*]pyridine (**36**). <sup>1</sup>H NMR spectrum (700 MHz, CDCl<sub>3</sub>).

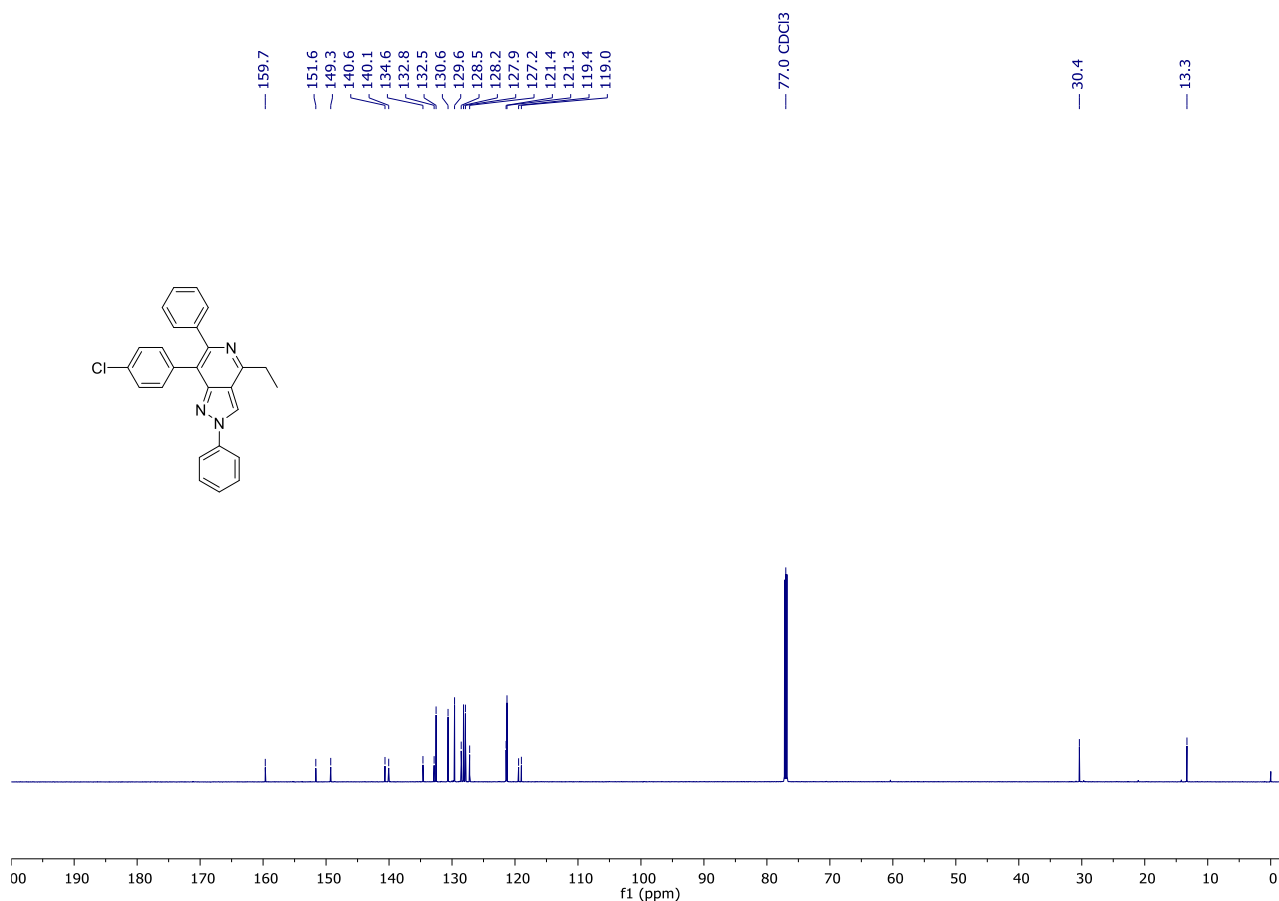

**Figure S121.** 7-(4-Chlorophenyl)-4-ethyl-2,6-diphenyl-2H-pyrazolo[4,3-c]pyridine (**36**).  $^{13}\text{C}$  NMR (176 MHz,  $\text{CDCl}_3$ ).

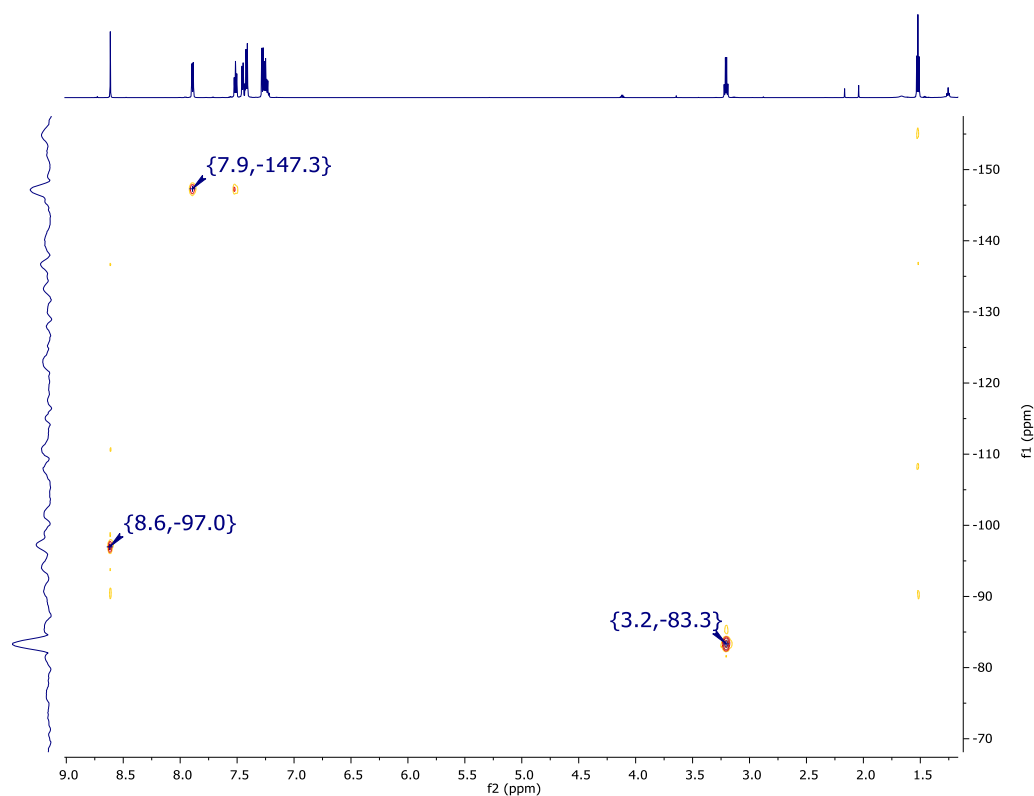

**Figure S122.** 7-(4-Chlorophenyl)-4-ethyl-2,6-diphenyl-2H-pyrazolo[4,3-c]pyridine (**36**).  $^1\text{H}$ - $^{15}\text{N}$  LR HSQMBC spectrum (700 MHz,  $\text{CDCl}_3$ ).

+MS, 3.0min #181

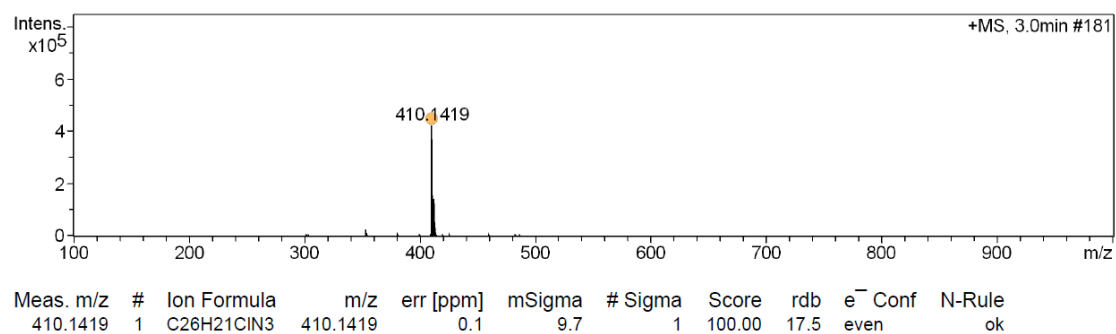

**Figure S123.** 7-(4-Chlorophenyl)-4-ethyl-2,6-diphenyl-2*H*-pyrazolo[4,3-*c*]pyridine (**36**). HRMS (ESI-TOF).

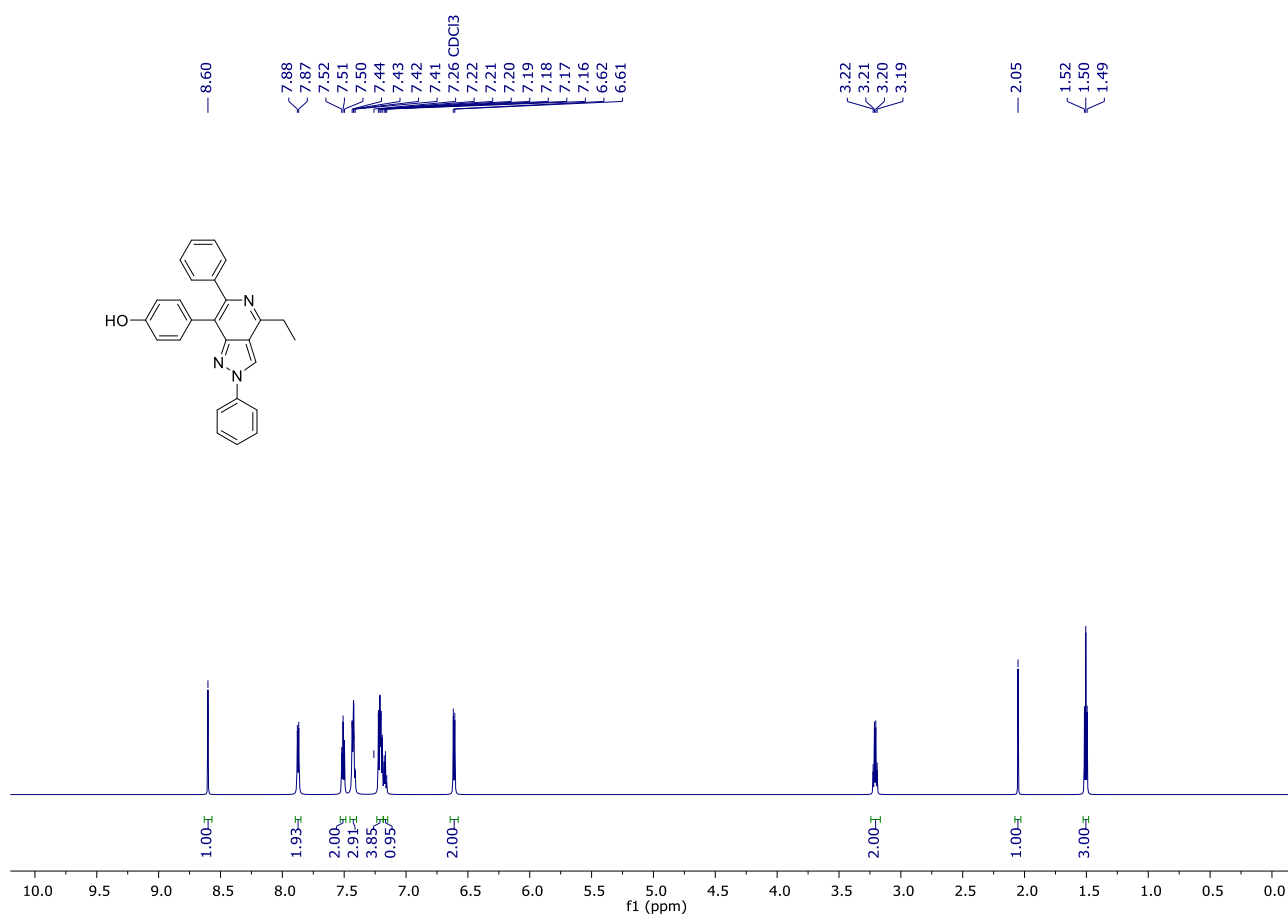

**Figure S124.** 4-(4-Ethyl-2,6-diphenyl-2*H*-pyrazolo[4,3-*c*]pyridin-7-yl)phenol (**37**). <sup>1</sup>H NMR spectrum (700 MHz, CDCl<sub>3</sub>).



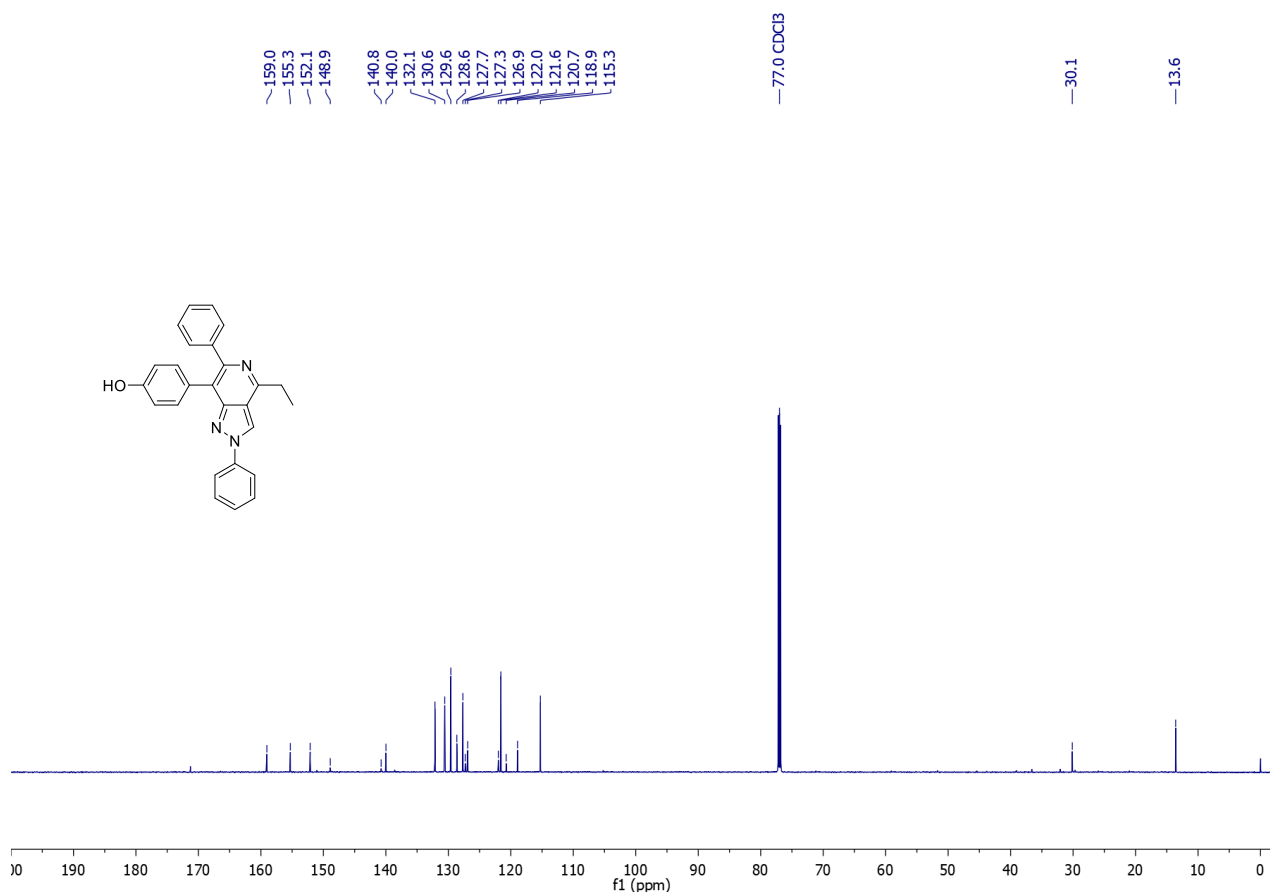

**Figure S125.** 4-(4-Ethyl-2,6-diphenyl-2H-pyrazolo[4,3-c]pyridin-7-yl)phenol (37). <sup>13</sup>C NMR (176 MHz, CDCl<sub>3</sub>).

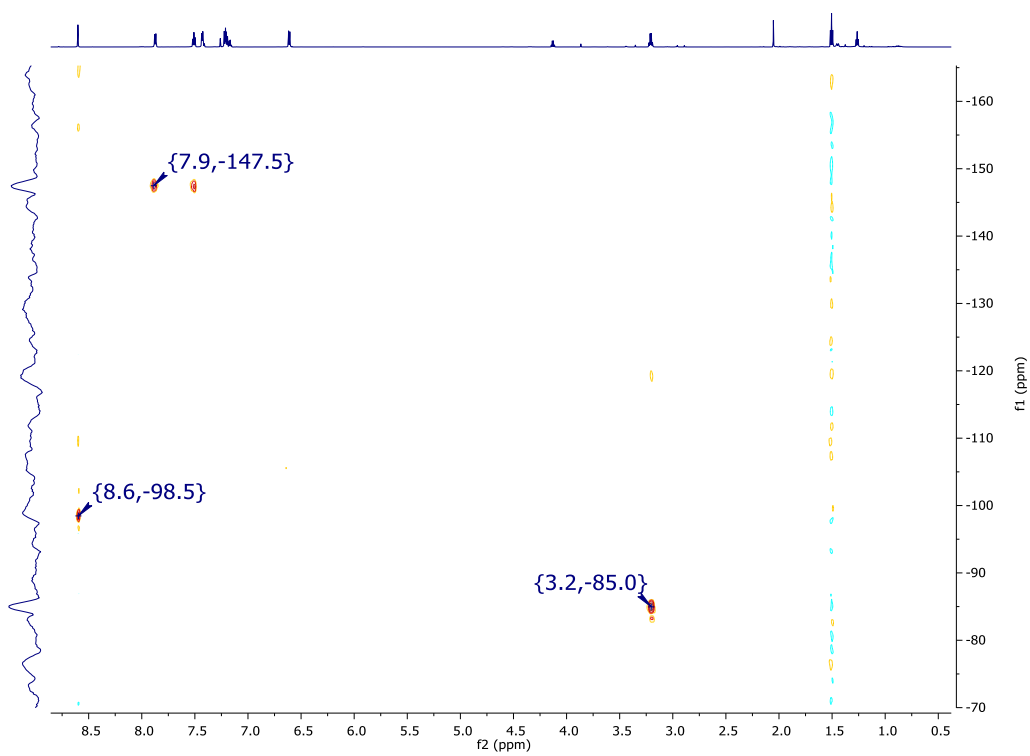

**Figure S126.** 4-(4-Ethyl-2,6-diphenyl-2H-pyrazolo[4,3-c]pyridin-7-yl)phenol (37). <sup>1</sup>H-<sup>15</sup>N LR HSQMBBC spectrum (700 MHz, CDCl<sub>3</sub>).

+MS, 2.9min #174

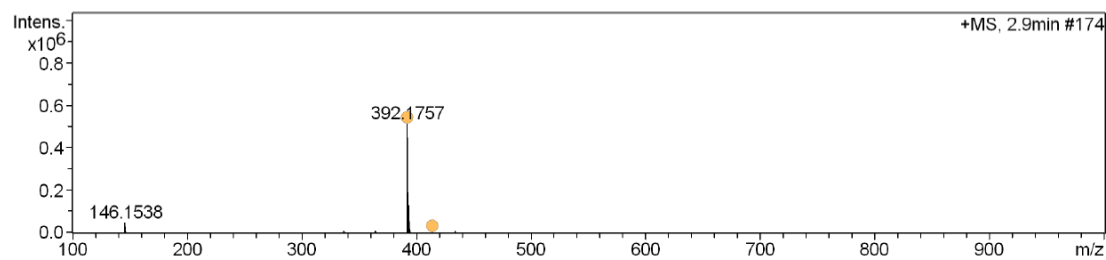

| Meas. m/z | # | Ion Formula                                        | m/z      | err [ppm] | mSigma | # Sigma | Score  | rdb  | e <sup>-</sup> Conf | N-Rule |
|-----------|---|----------------------------------------------------|----------|-----------|--------|---------|--------|------|---------------------|--------|
| 392.1757  | 1 | C <sub>26</sub> H <sub>22</sub> N <sub>3</sub> O   | 392.1757 | -0.0      | 3.0    | 1       | 100.00 | 17.5 | even                | ok     |
| 414.1589  | 1 | C <sub>26</sub> H <sub>21</sub> N <sub>3</sub> NaO | 414.1577 | -2.8      | 41.5   | 1       | 100.00 | 17.5 | even                | ok     |

**Figure S127.** 4-(4-Ethyl-2,6-diphenyl-2*H*-pyrazolo[4,3-*c*]pyridin-7-yl)phenol (**37**). HRMS (ESI-TOF).

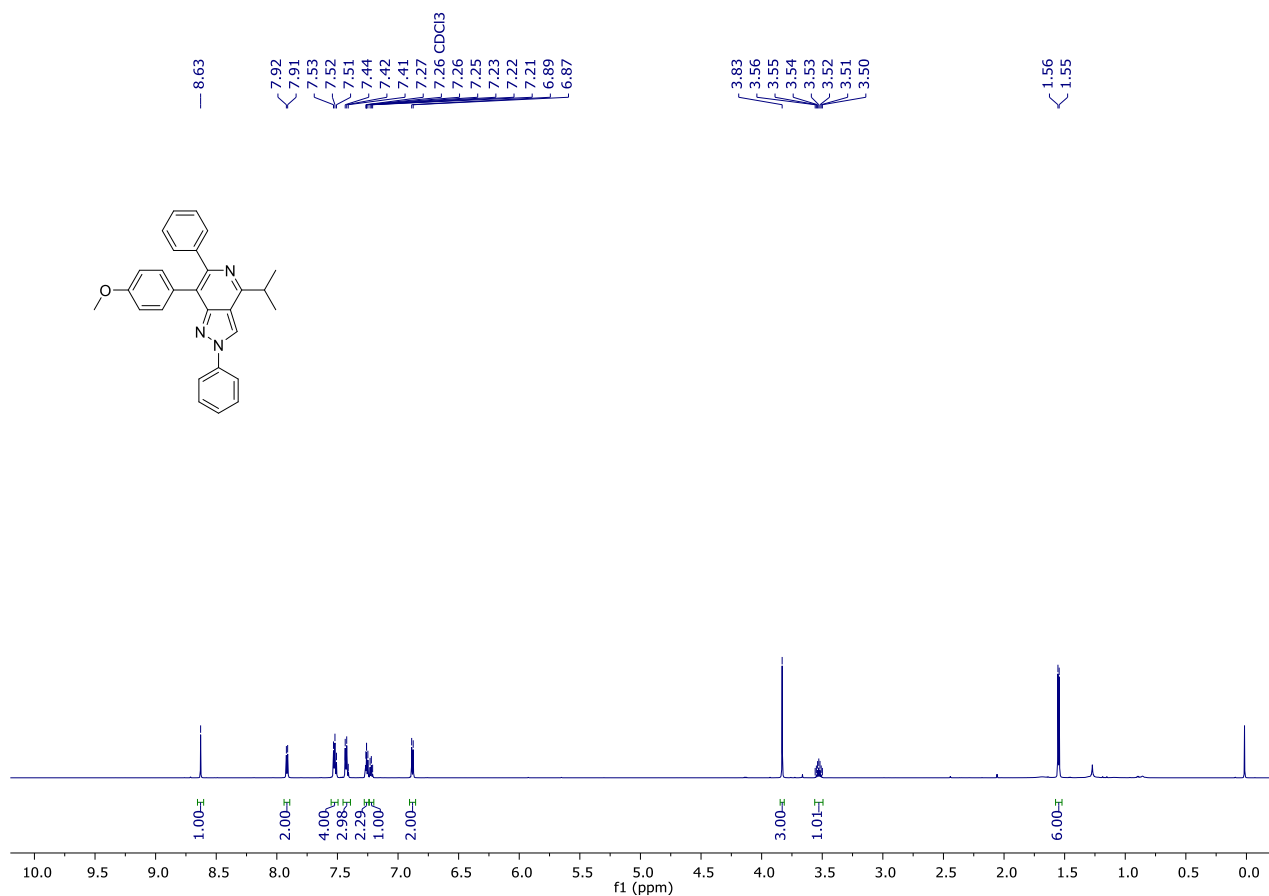

**Figure S128.** 4-Isopropyl-7-(4-methoxyphenyl)-4-methyl-2,6-diphenyl-2H-pyrazolo[4,3-c]pyridine (**38**). <sup>1</sup>H NMR spectrum (700 MHz, CDCl<sub>3</sub>).

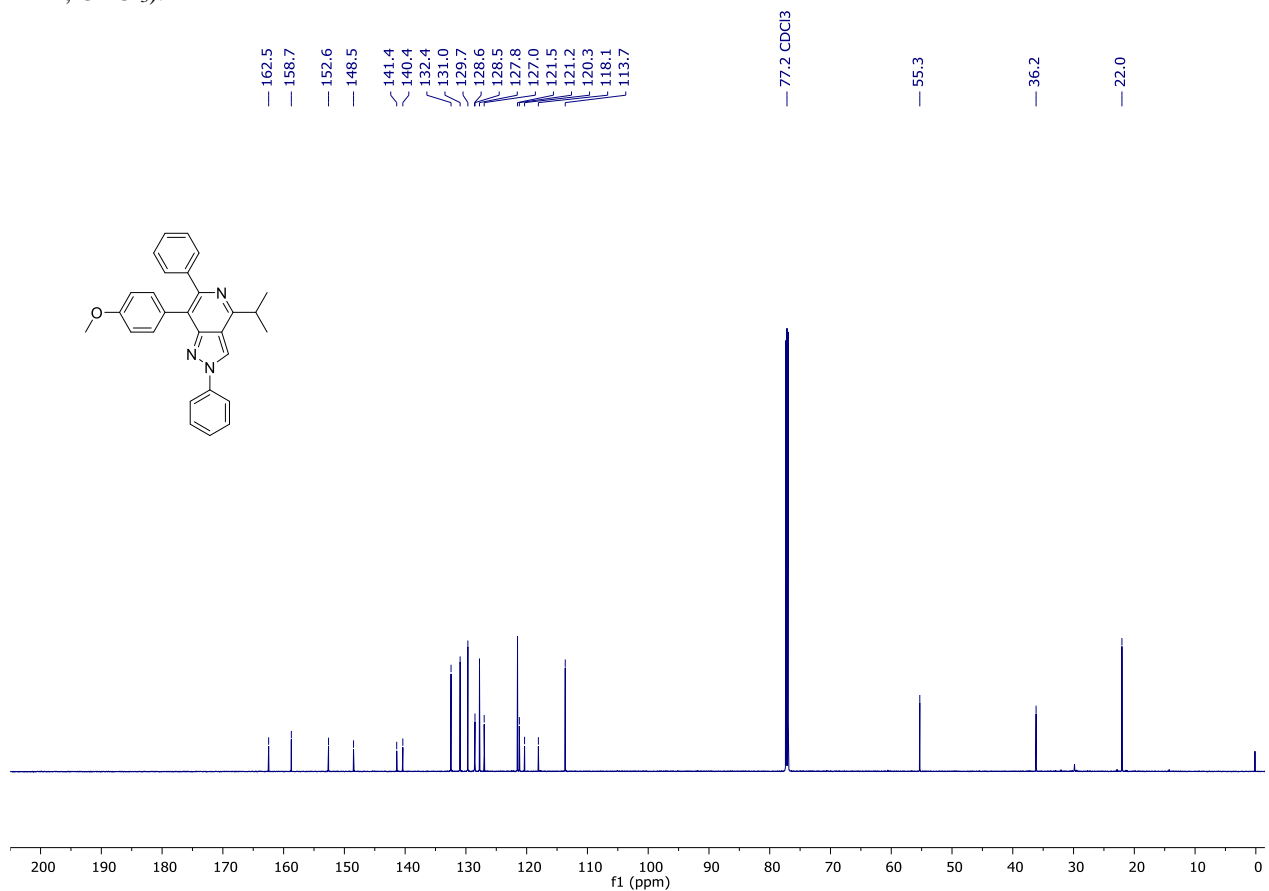

**Figure S129.** 4-Isopropyl-7-(4-methoxyphenyl)-4-methyl-2,6-diphenyl-2H-pyrazolo[4,3-c]pyridine (**38**). <sup>13</sup>C NMR (176 MHz, CDCl<sub>3</sub>).

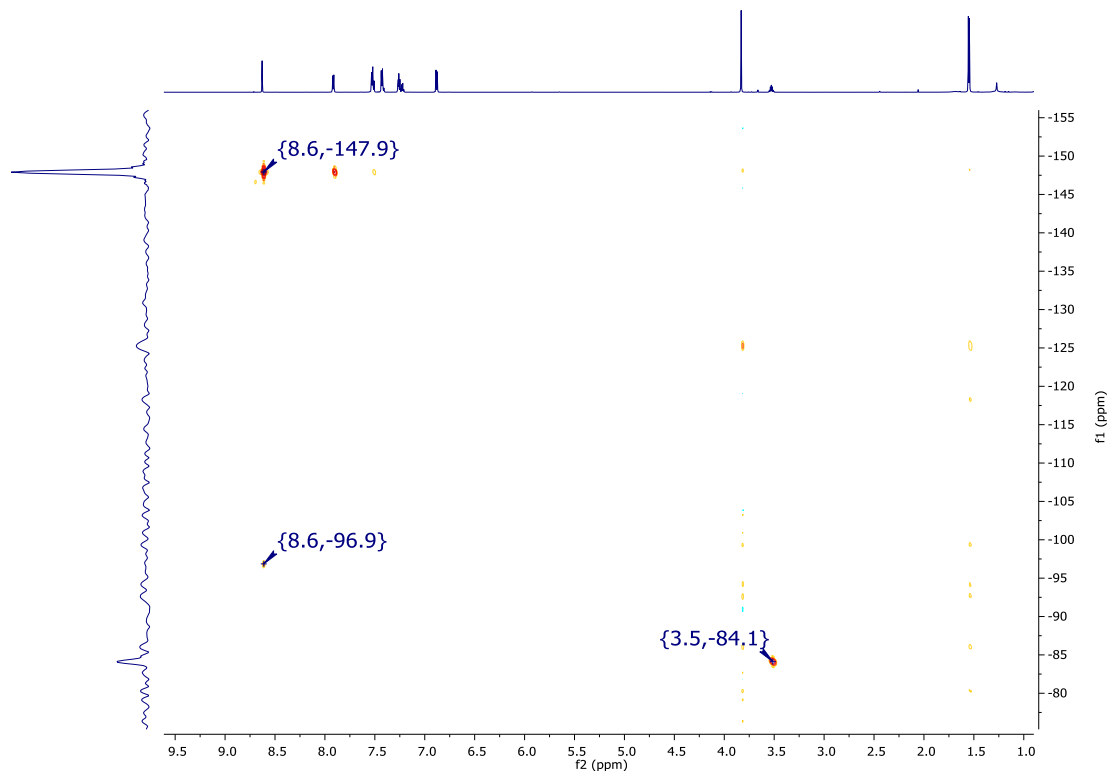

**Figure S130.** 4-Isopropyl-7-(4-methoxyphenyl)-4-methyl-2,6-diphenyl-2*H*-pyrazolo[4,3-*c*]pyridine (**38**).  $^1\text{H}$ - $^{15}\text{N}$  HMBC spectrum (700 MHz,  $\text{CDCl}_3$ ).

**+MS, 4.2min #246**

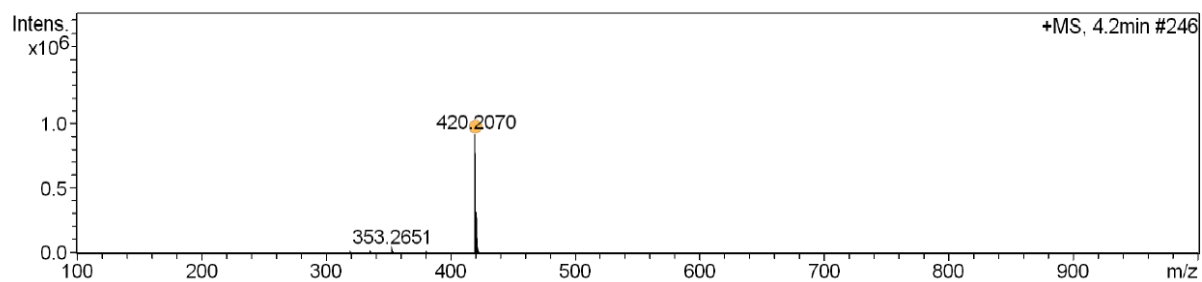

| Meas. $m/z$ | # | Ion Formula                                      | $m/z$    | err [ppm] | mSigma | # Sigma | Score  | rdb  | $e^-$ | Conf | N-Rule |
|-------------|---|--------------------------------------------------|----------|-----------|--------|---------|--------|------|-------|------|--------|
| 420.2070    | 1 | C <sub>28</sub> H <sub>26</sub> N <sub>3</sub> O | 420.2070 | -0.0      | 17.8   | 1       | 100.00 | 17.5 | even  |      | ok     |

**Figure S131.** 4-Isopropyl-7-(4-methoxyphenyl)-4-methyl-2,6-diphenyl-2*H*-pyrazolo[4,3-*c*]pyridine (**38**). HRMS (ESI-TOF).

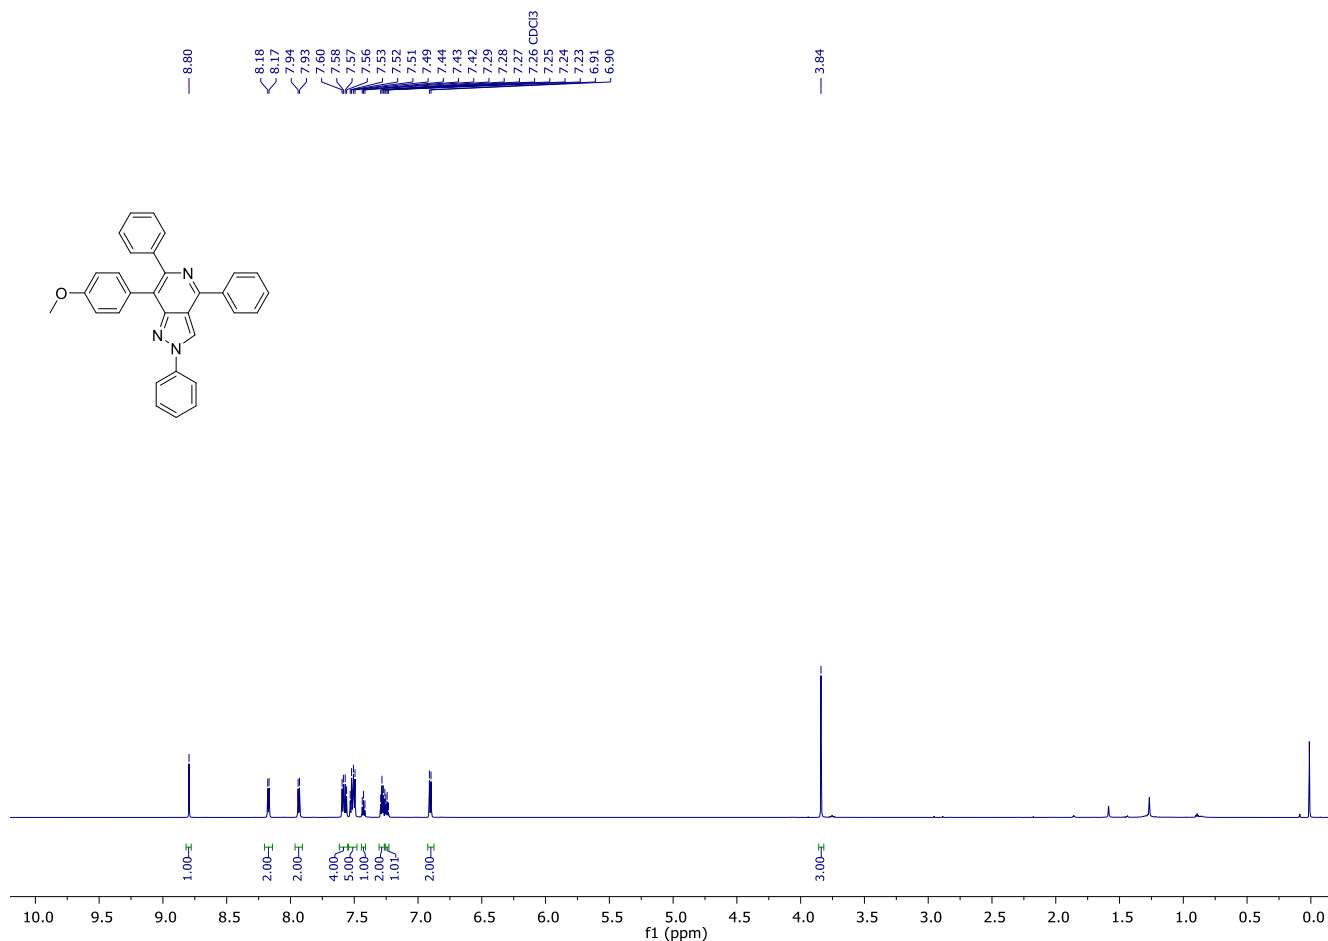

**Figure S132.** 7-(4-Methoxyphenyl)-2,4,6-triphenyl-2H-pyrazolo[4,3-c]pyridine (**39**). <sup>1</sup>H NMR spectrum (700 MHz, CDCl<sub>3</sub>).

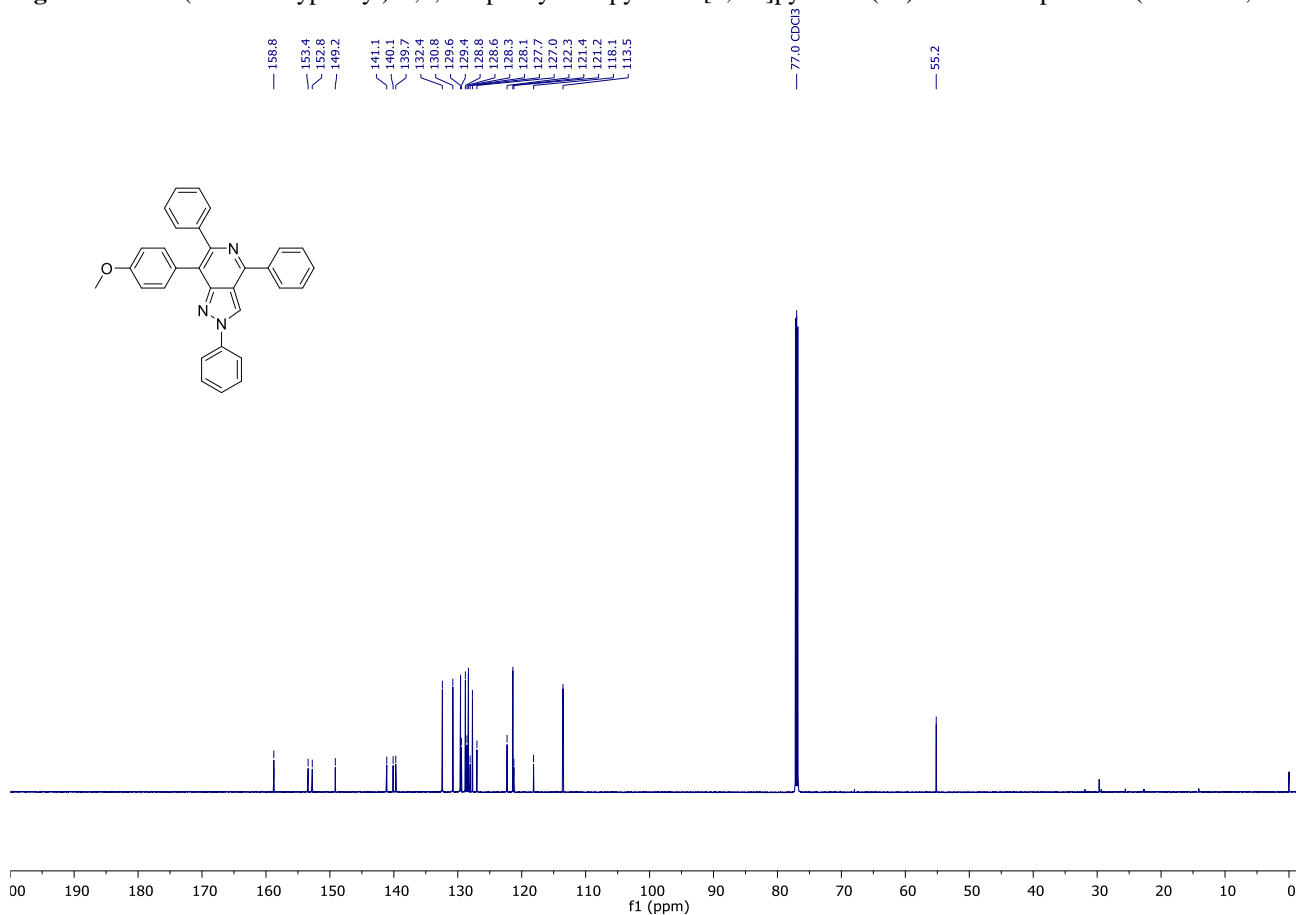

**Figure S133.** 7-(4-Methoxyphenyl)-2,4,6-triphenyl-2H-pyrazolo[4,3-c]pyridine (**39**). <sup>13</sup>C NMR (176 MHz, CDCl<sub>3</sub>).

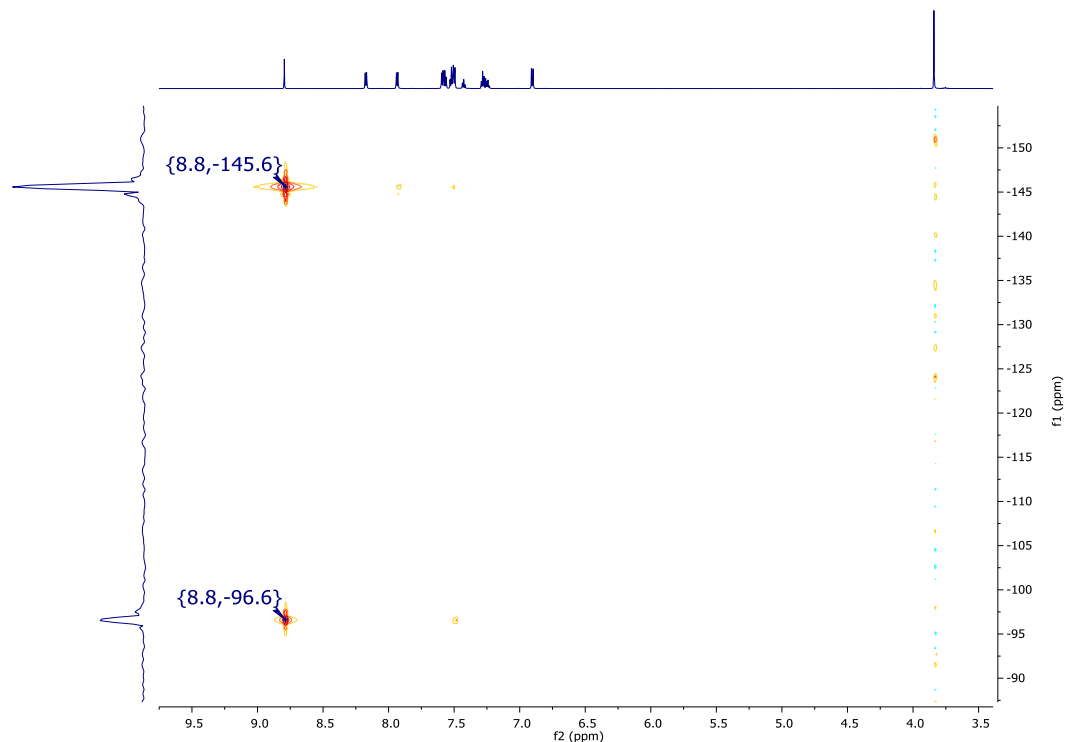

**Figure S134.** 7-(4-Methoxyphenyl)-2,4,6-triphenyl-2*H*-pyrazolo[4,3-*c*]pyridine (**39**).  $^1\text{H}$ - $^{15}\text{N}$  LR HSQMBBC spectrum (700 MHz,  $\text{CDCl}_3$ ).

**+MS, 7.1min #425**

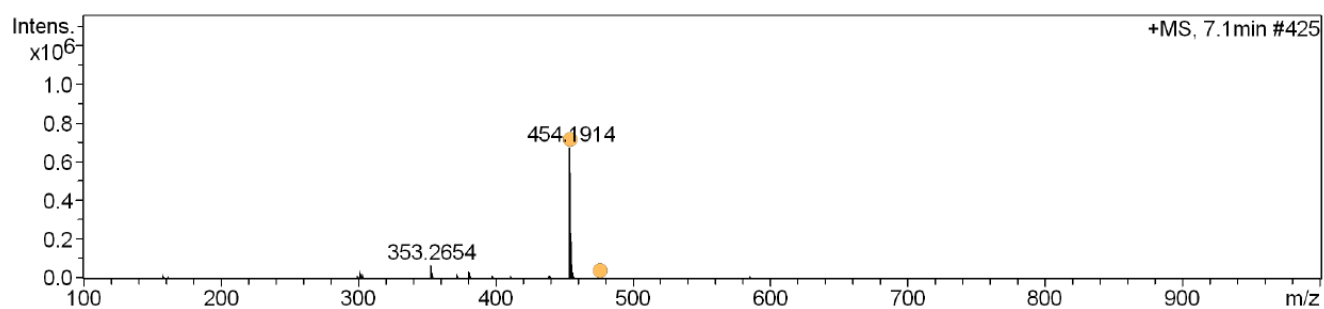

| Meas. m/z | # | Ion Formula                                        | m/z      | err [ppm] | mSigma | # Sigma | Score  | rdb  | e <sup>-</sup> Conf | N-Rule |
|-----------|---|----------------------------------------------------|----------|-----------|--------|---------|--------|------|---------------------|--------|
| 454.1914  | 1 | C <sub>31</sub> H <sub>24</sub> N <sub>3</sub> O   | 454.1914 | 0.0       | 1.4    | 1       | 100.00 | 21.5 | even                | ok     |
| 476.1721  | 1 | C <sub>31</sub> H <sub>23</sub> N <sub>3</sub> NaO | 476.1733 | 2.6       | 107.0  | 1       | 100.00 | 21.5 | even                | ok     |

**Figure S135.** 7-(4-Methoxyphenyl)-2,4,6-triphenyl-2*H*-pyrazolo[4,3-*c*]pyridine (**39**). HRMS (ESI-TOF).

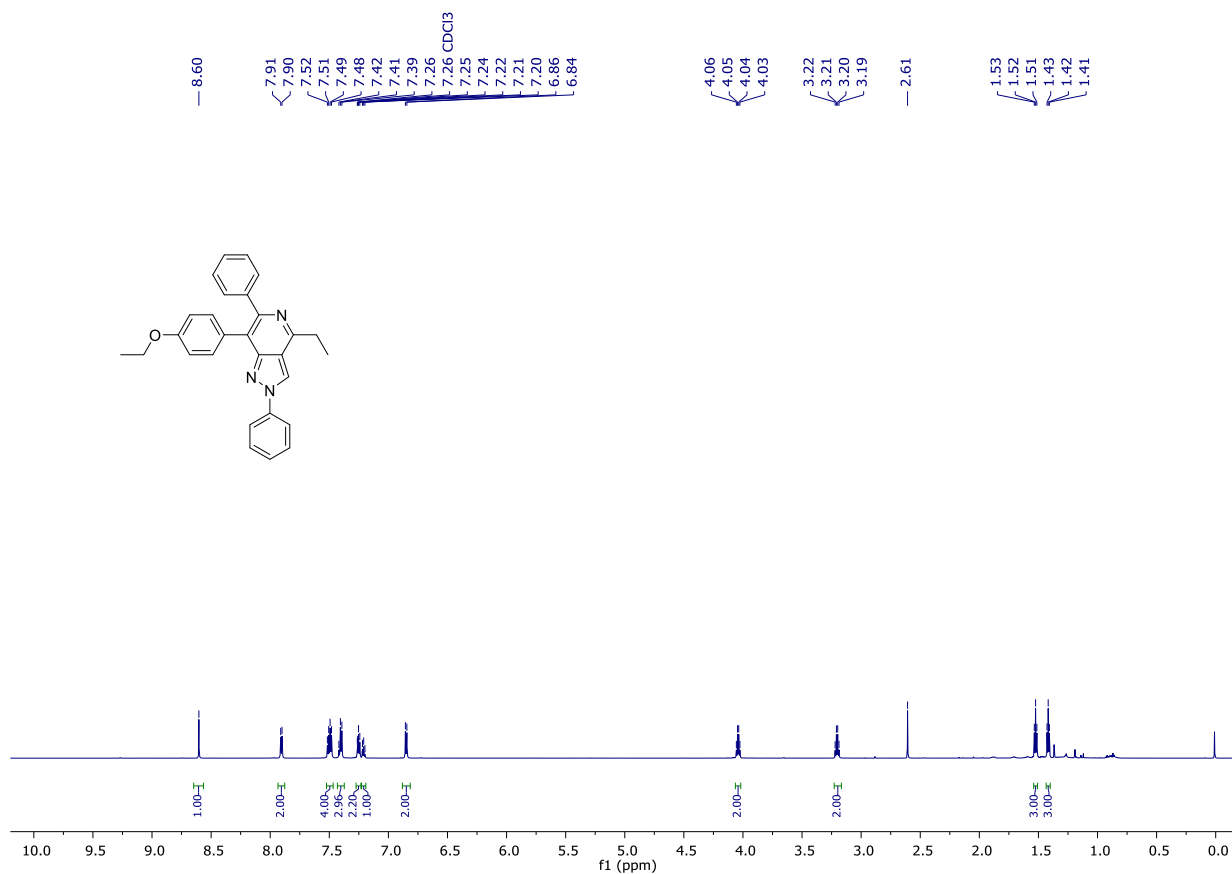

**Figure S136.** 7-(4-Ethoxyphenyl)-4-ethyl-2,6-diphenyl-2*H*-pyrazolo[4,3-*c*]pyridine (**40**). <sup>1</sup>H NMR spectrum (700 MHz, CDCl<sub>3</sub>).

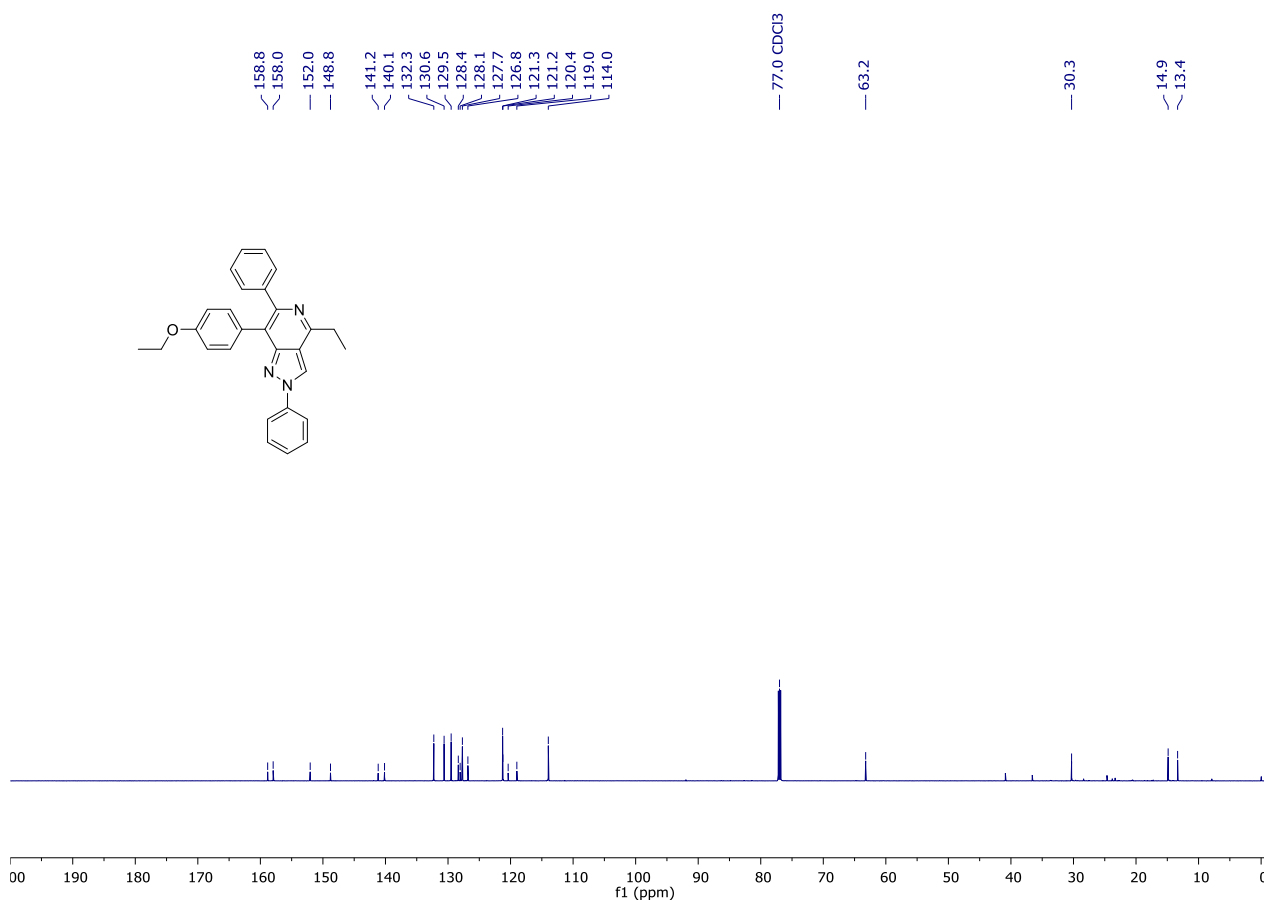

**Figure S137.** 7-(4-Ethoxyphenyl)-4-ethyl-2,6-diphenyl-2*H*-pyrazolo[4,3-*c*]pyridine (**40**). <sup>13</sup>C NMR (176 MHz, CDCl<sub>3</sub>).

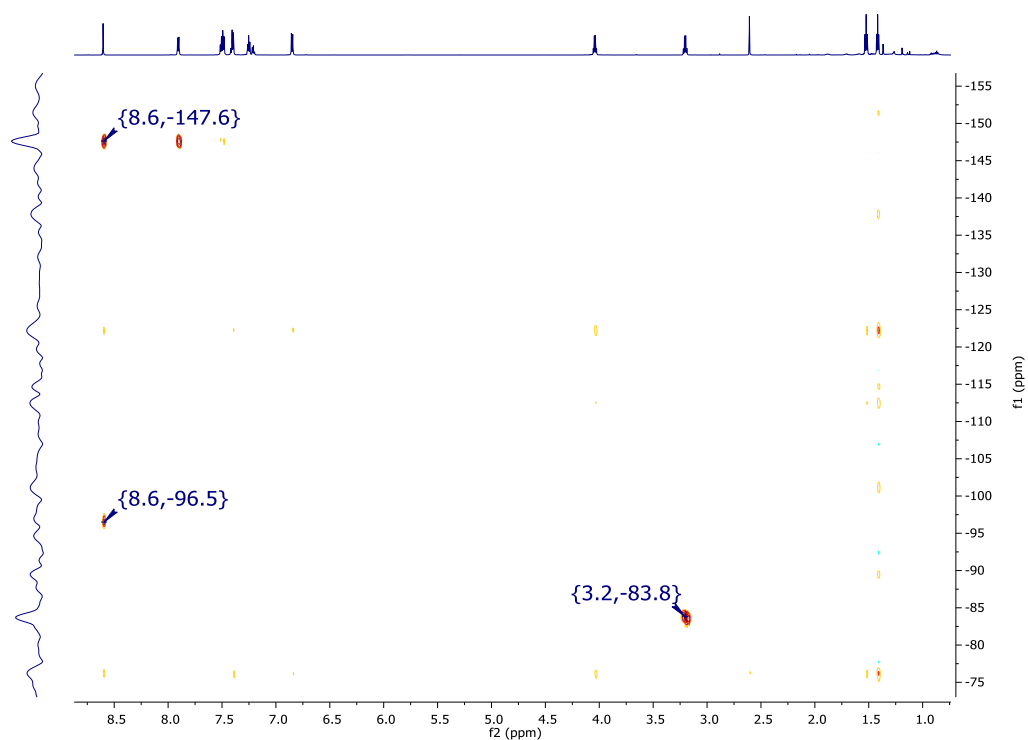

**Figure S138.** 7-(4-Ethoxyphenyl)-4-ethyl-2,6-diphenyl-2*H*-pyrazolo[4,3-*c*]pyridine (**40**).  $^1\text{H}$ - $^{15}\text{N}$  LR HSQMBBC spectrum (700 MHz,  $\text{CDCl}_3$ ).

**+MS, 4.3min #258**

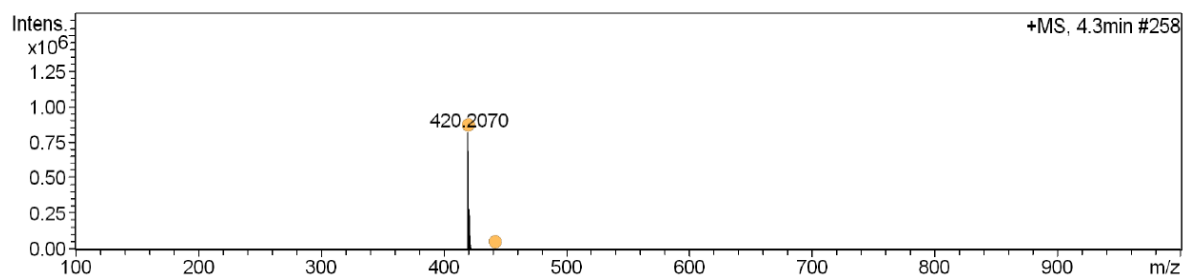

| Meas. m/z | # | Ion Formula                                        | m/z      | err [ppm] | mSigma | # Sigma | Score  | rdb  | e <sup>-</sup> | Conf | N-Rule |
|-----------|---|----------------------------------------------------|----------|-----------|--------|---------|--------|------|----------------|------|--------|
| 420.2070  | 1 | C <sub>28</sub> H <sub>26</sub> N <sub>3</sub> O   | 420.2070 | -0.1      | 14.5   | 1       | 100.00 | 17.5 | even           |      | ok     |
| 442.1894  | 1 | C <sub>28</sub> H <sub>25</sub> N <sub>3</sub> NaO | 442.1890 | -1.0      | 34.0   | 1       | 100.00 | 17.5 | even           |      | ok     |

**Figure S139.** 7-(4-Ethoxyphenyl)-4-ethyl-2,6-diphenyl-2*H*-pyrazolo[4,3-*c*]pyridine (**40**). HRMS (ESI-TOF).



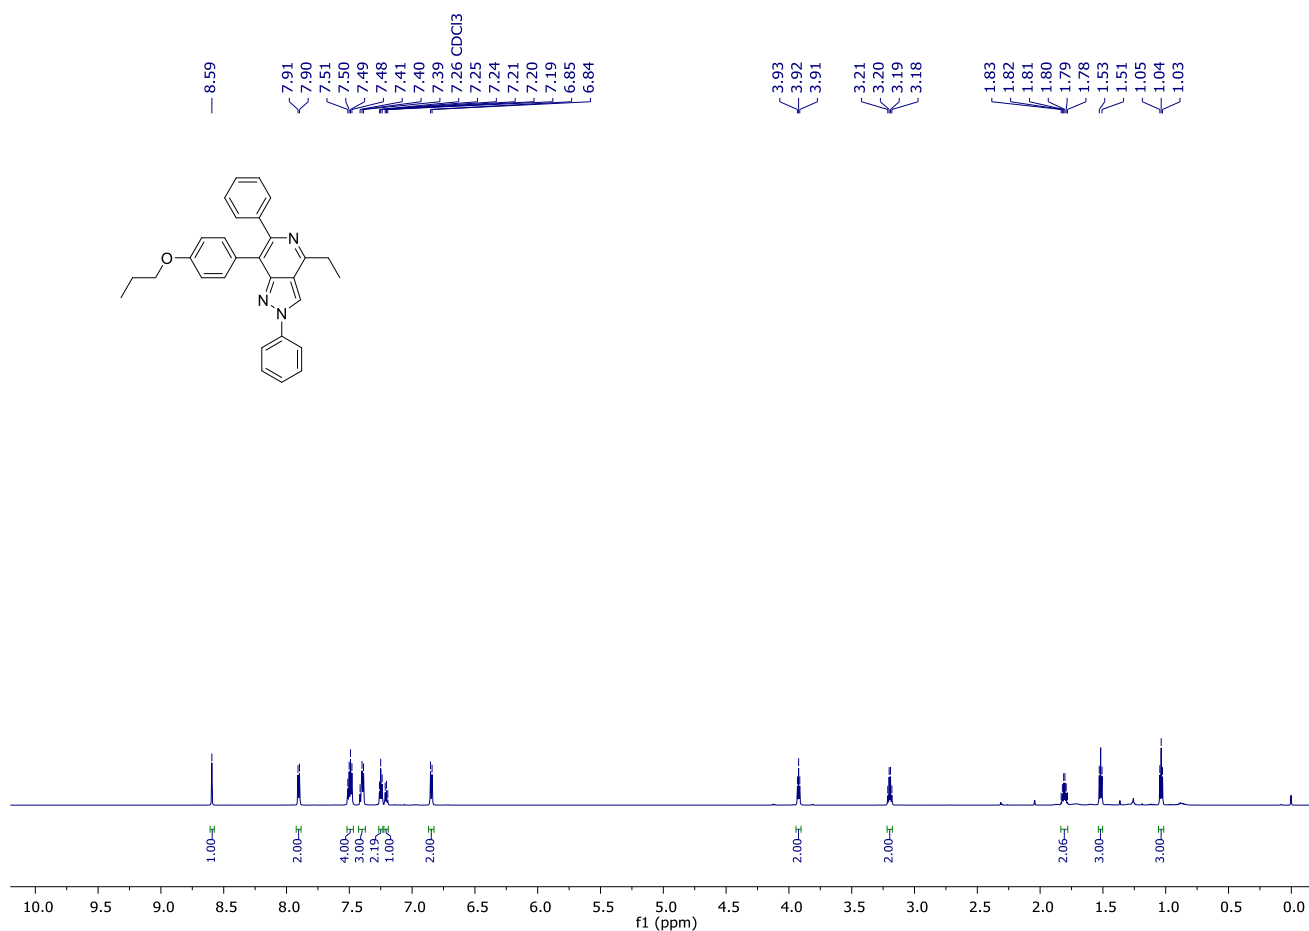

**Figure S140.** 4-Ethyl-2,6-diphenyl-7-(4-propoxyphenyl)-2H-pyrazolo[4,3-c]pyridine (**41**). <sup>1</sup>H NMR spectrum (700 MHz, CDCl<sub>3</sub>).

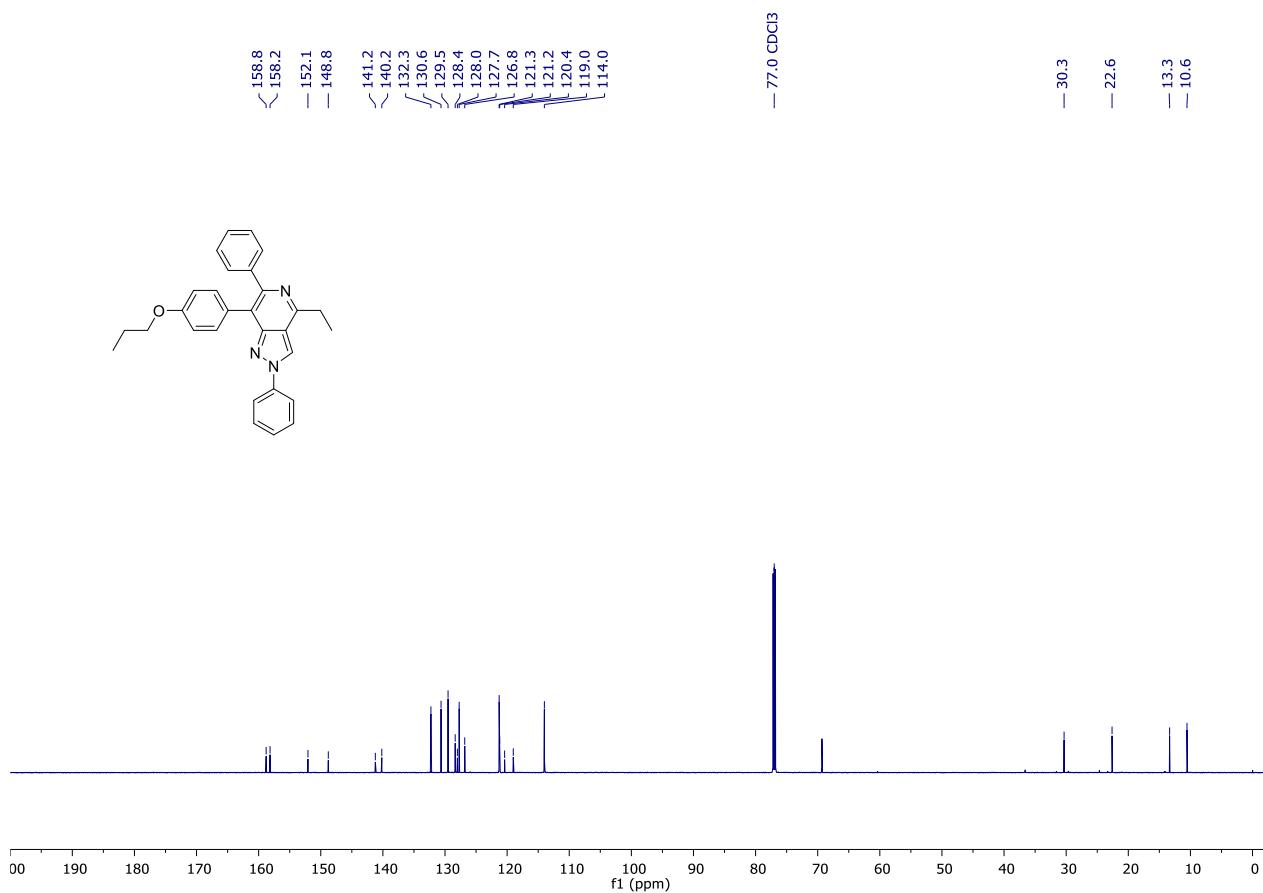

**Figure S141.** 4-Ethyl-2,6-diphenyl-7-(4-propoxyphenyl)-2H-pyrazolo[4,3-c]pyridine (**41**). <sup>13</sup>C NMR (176 MHz, CDCl<sub>3</sub>).

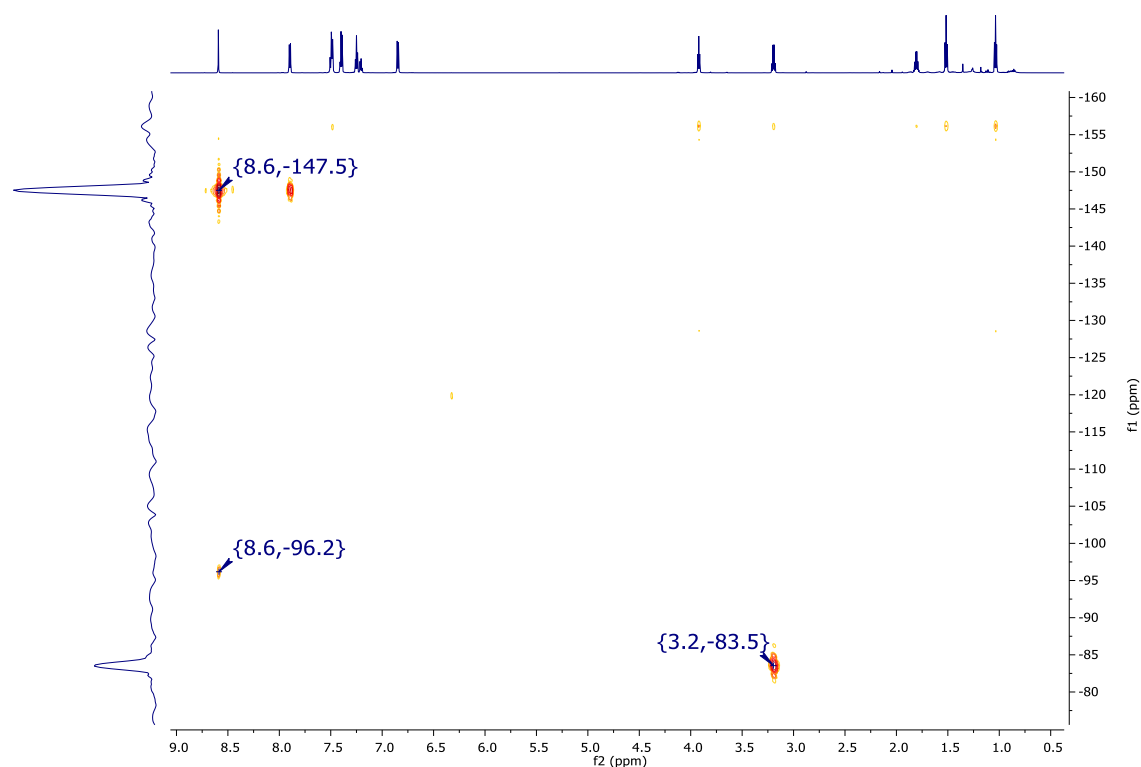

**Figure S142.** 4-Ethyl-2,6-diphenyl-7-(4-propoxyphenyl)-2*H*-pyrazolo[4,3-*c*]pyridine (**41**).  $^1\text{H}$ - $^{15}\text{N}$  HMBC spectrum (700 MHz,  $\text{CDCl}_3$ ).

**+MS, 6.3min #378**

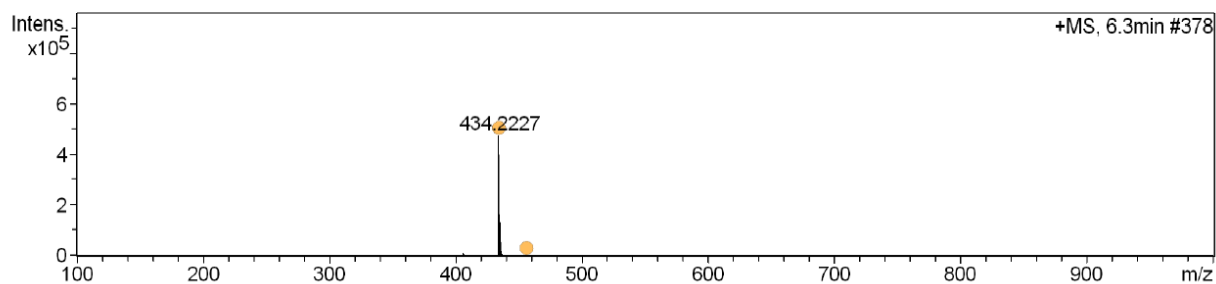

| Meas. $m/z$ | # | Ion Formula                                      | $m/z$    | err [ppm] | mSigma | # Sigma | Score  | rdb  | $e^-$ Conf | N-Rule |
|-------------|---|--------------------------------------------------|----------|-----------|--------|---------|--------|------|------------|--------|
| 434.2227    | 1 | $\text{C}_{29}\text{H}_{28}\text{N}_3\text{O}$   | 434.2227 | 0.1       | 2.2    | 1       | 100.00 | 17.5 | even       | ok     |
| 456.2041    | 1 | $\text{C}_{29}\text{H}_{27}\text{N}_3\text{NaO}$ | 456.2046 | -1.1      | 30.0   | 1       | 100.00 | 17.5 | even       | ok     |

**Figure S143.** 4-Ethyl-2,6-diphenyl-7-(4-propoxyphenyl)-2*H*-pyrazolo[4,3-*c*]pyridine (**41**). HRMS (ESI-TOF).

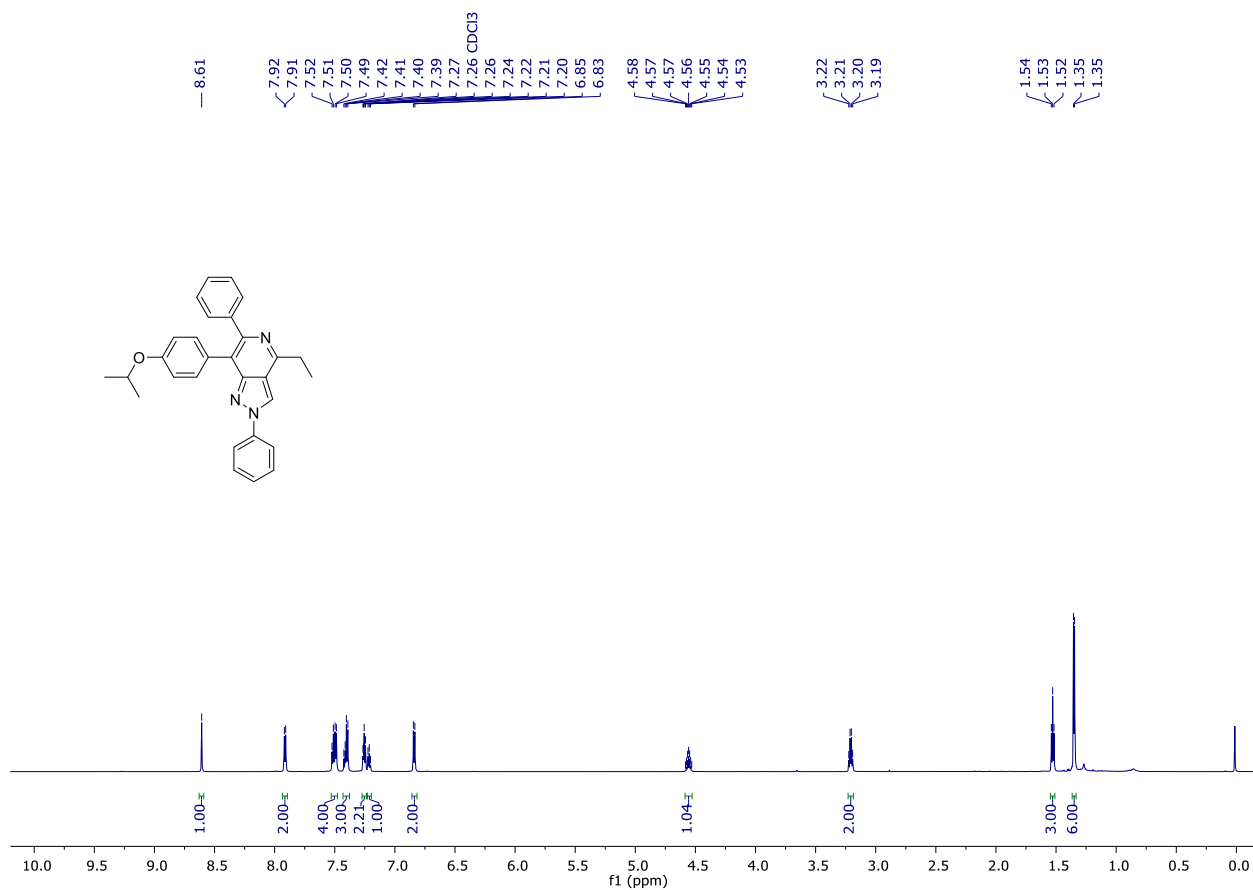

**Figure S144.** 4-Ethyl-7-(4-isopropoxyphenyl)-2,6-diphenyl-2H-pyrazolo[4,3-c]pyridine (**42**). <sup>1</sup>H NMR spectrum (700 MHz, CDCl<sub>3</sub>).

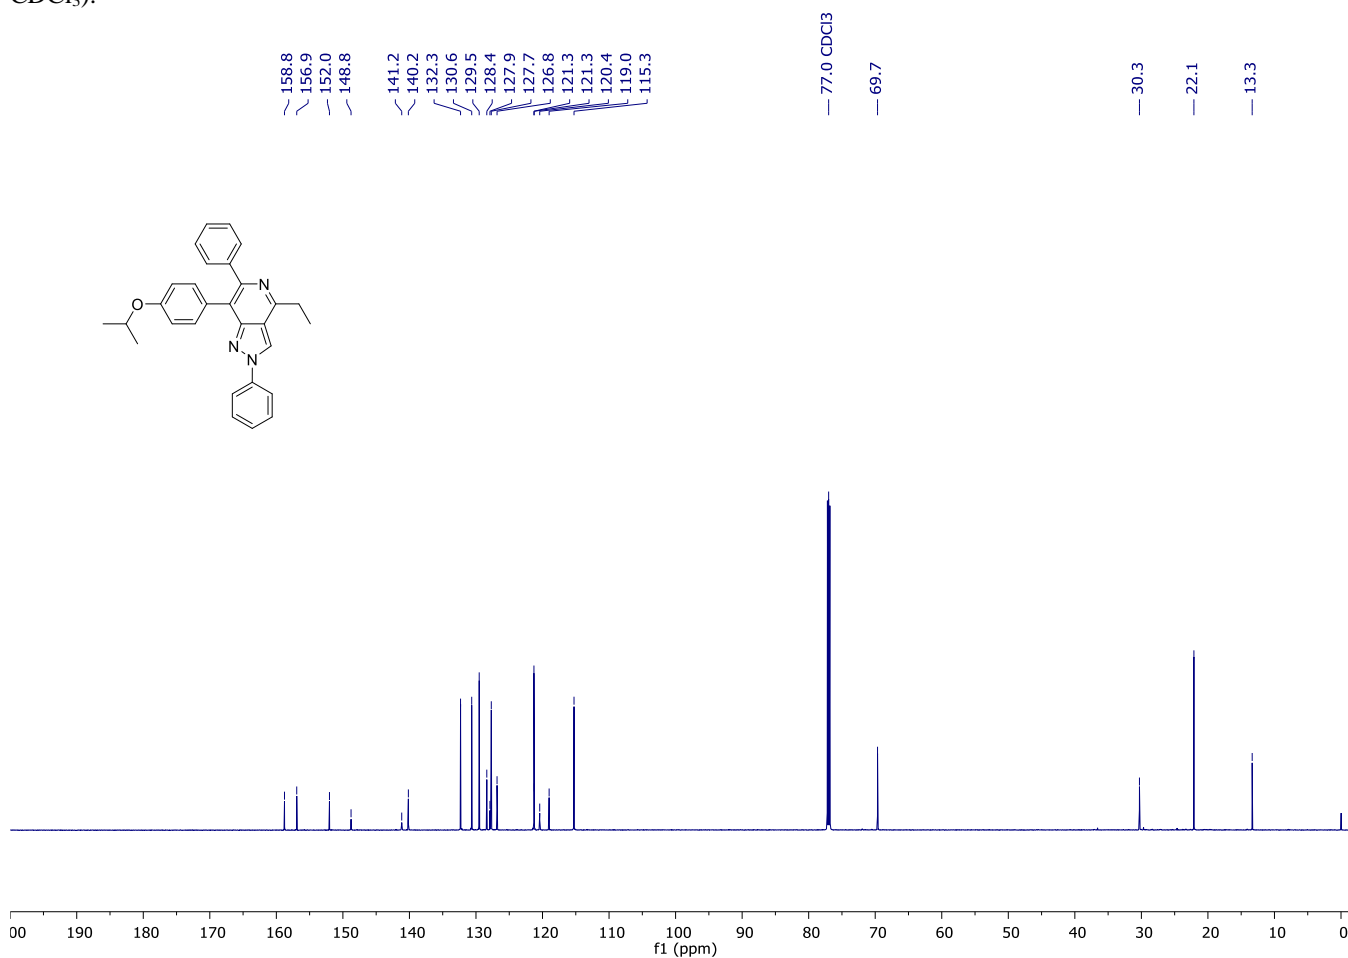

**Figure S145.** 4-Ethyl-7-(4-isopropoxyphenyl)-2,6-diphenyl-2H-pyrazolo[4,3-c]pyridine (**42**). <sup>13</sup>C NMR (176 MHz, CDCl<sub>3</sub>).

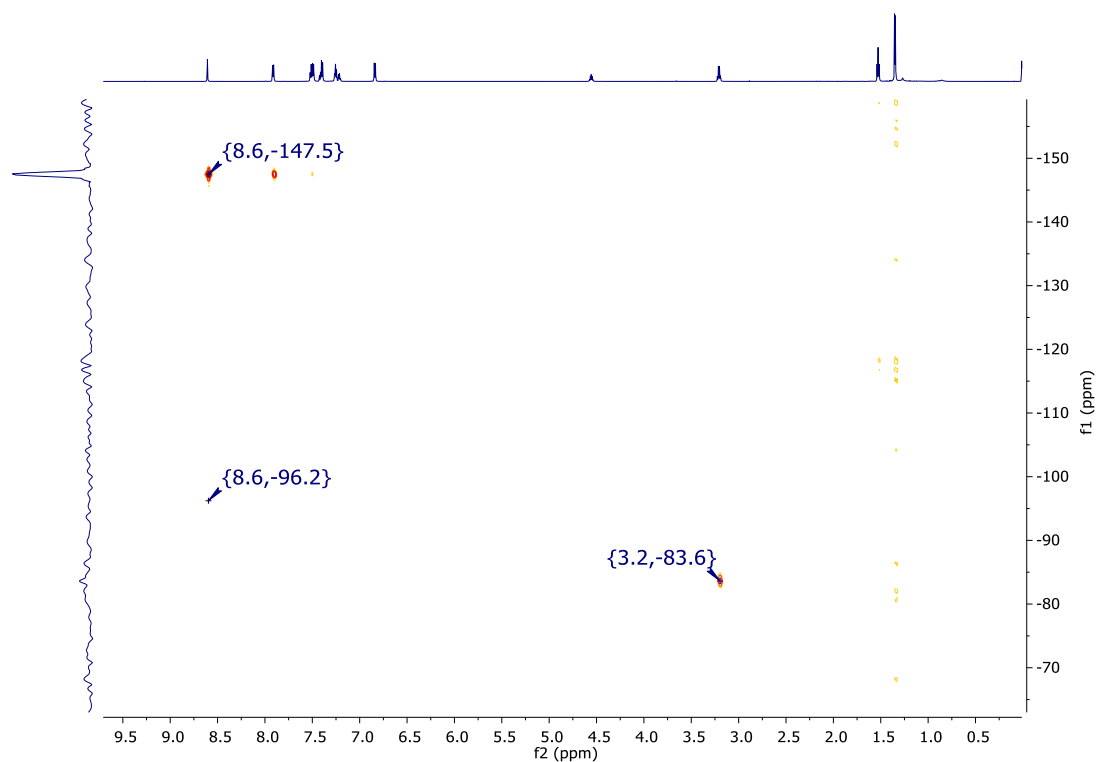

**Figure S146.** 4-Ethyl-7-(4-isopropoxyphenyl)-2,6-diphenyl-2*H*-pyrazolo[4,3-*c*]pyridine (**42**). <sup>1</sup>H-<sup>15</sup>N HMBC spectrum (700 MHz, CDCl<sub>3</sub>).

+MS, 4.2min #250

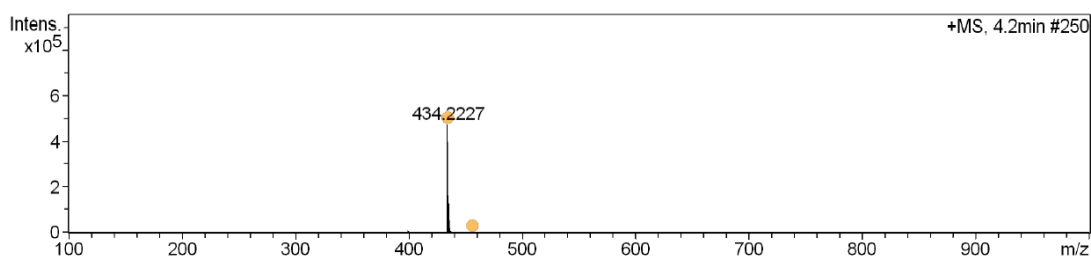

| Meas. m/z | # | Ion Formula                                        | m/z      | err [ppm] | mSigma | # Sigma | Score  | rdb  | e <sup>-</sup> Conf | N-Rule |
|-----------|---|----------------------------------------------------|----------|-----------|--------|---------|--------|------|---------------------|--------|
| 434.2227  | 1 | C <sub>29</sub> H <sub>28</sub> N <sub>3</sub> O   | 434.2227 | 0.1       | 4.5    | 1       | 100.00 | 17.5 | even                | ok     |
| 456.2052  | 1 | C <sub>29</sub> H <sub>27</sub> N <sub>3</sub> NaO | 456.2046 | -1.3      | 31.9   | 1       | 100.00 | 17.5 | even                | ok     |

**Figure S147.** 4-Ethyl-7-(4-isopropoxyphenyl)-2,6-diphenyl-2*H*-pyrazolo[4,3-*c*]pyridine (**42**). HRMS (ESI-TOF).
